**Effects of prenatal small-quantity lipid-based nutrient supplements on pregnancy, birth and infant outcomes: a systematic review and meta-analysis of individual participant data from randomized controlled trials in low- and middle-income countries**

Kathryn G. Dewey, K. Ryan Wessells, Charles D. Arnold, Seth Adu-Afarwuah, Benjamin F. Arnold, Per Ashorn, Ulla Ashorn, Ana Garcés, Lieven Huybregts, Nancy F. Krebs, Anna Lartey, Jef L. Leroy, Kenneth Maleta, Susana L. Matias, Sophie E. Moore, Malay K. Mridha, Harriet Okronipa, Christine P. Stewart

Institute for Global Nutrition and Department of Nutrition, University of California, Davis, Davis, CA, USA (KGD, KRW, CDA, CPS)

Department of Nutrition and Food Science, University of Ghana, Legon, Accra, Ghana (SAA, AL)

Francis I. Proctor Foundation, University of California, San Francisco, San Francisco, CA, USA (BFA)

Center for Child, Adolescent and Maternal Health Research, Faculty of Medicine and Health Technology, Tampere University, Tampere, Finland (PA, UA)

Department of Paediatrics, Tampere University Hospital, Tampere, Finland (PA)

Proyecto Salud y Nutrición, Jhpiego, Guatemala City, Guatemala (AG)

Poverty, Health, and Nutrition Division, International Food Policy Research Institute, Washington, DC, USA (LH, JL)

Section of Nutrition, Department of Pediatrics, University of Colorado School of Medicine, Denver, CO, USA (NFK)

Department of Nutrition and Dietetics, School of Global and Public Health, Kamuzu University of Health Sciences, Blantyre, Malawi (KM)

Department of Nutritional Sciences and Toxicology, University of California, Berkeley, Berkeley, CA, USA (SLM)

Department of Women & Children's Health, King's College London, London, UK and MRC Unit The Gambia at the London School of Hygiene and Tropical Medicine, Fajara, The Gambia (SEM)

Center for Non-communicable Diseases and Nutrition, BRAC James P Grant School of Public Health, Bangladesh (MKM)

Department of Nutritional Sciences, Oklahoma State University, Stillwater, OK, USA (HO)

Corresponding Author: Kathryn G. Dewey, Department of Nutrition, University of California, One Shields Ave., Davis, CA 95616; 530 752 0851; [kgdewey@ucdavis.edu](mailto:kgdewey@ucdavis.edu)

Sources of Support: Bill & Melinda Gates Foundation OPP49817. The funder had no role in the design, implementation, analysis or interpretation of the data.

Short running head: Effects of prenatal SQ-LNS

Abbreviations: BEP, balanced energy protein; BMIZ, body mass index-for-age z-score; EFA, essential fatty acids; GRADE, Grading of Recommendations Assessment, Development and Evaluation; HCGAZ, head circumference-for-gestational age z-score; HCZ, head circumference-for-age z-score; IFA, iron and folic acid supplement; IPD, individual participant data; IRB, institutional review board; LAZ, length-for-age z-score; LBW, low birth weight; LMIC, low-

and middle-income countries; LGA, large-for-gestational age; LGAZ, length-for-gestational age z-score; LNS, lipid-based nutrient supplements; LQ-LNS, large-quantity lipid-based nutrient supplements; MD, mean difference; MMS, multiple micronutrient supplement; MQ-LNS, medium-quantity lipid-based nutrient supplements; MUAC, mid-upper arm circumference; MUACZ, mid-upper arm circumference z-score; PR, prevalence ratio; RCT, randomized controlled trial; RR, relative risk; SAP, statistical analysis plan; SGA, small-for-gestational age; SOC, standard of care; SQ-LNS, small-quantity lipid-based nutrient supplements; SVN, small vulnerable newborn; WAZ, weight-for-age z-score; WGAZ, weight-for-gestational age z-score; WLZ, weight-for-length z-score.

Registry and registry number for systematic reviews or meta-analyses: Registered at [www.crd.york.ac.uk/PROSPERO](http://www.crd.york.ac.uk/PROSPERO) as CRD42021283391 on 11 April 2021.

Data described in the manuscript, code book, and analytic code will not be made available because they are compiled from 4 different trials, and access is under the control of the investigators of each of those trials.

Dr. Nancy Krebs is on the Editorial Board of the American Journal of Clinical Nutrition and played no role in the Journal's evaluation of the manuscript.

## 1 **Abstract**

2 Background: Undernutrition during pregnancy increases the risk of giving birth to a small  
3 vulnerable newborn. Small-quantity lipid-based nutrient supplements (SQ-LNS) contain both  
4 macro- and micronutrients and can help prevent nutritional deficiencies during pregnancy and  
5 lactation.

6 Objectives: We examined effects of SQ-LNS provided to pregnant women, compared to a) iron  
7 and folic acid or standard of care (IFA/SOC) or b) multiple micronutrient supplements (MMS),  
8 and identified characteristics that modified effects of SQ-LNS on birth outcomes.

9 Methods: We conducted a 2-stage meta-analysis of individual participant data from 4  
10 randomized controlled trials of SQ-LNS provided to pregnant women ( $n = 5,273$ ). We generated  
11 study-specific and subgroup estimates of SQ-LNS compared with IFA/SOC or MMS and pooled  
12 the estimates. In sensitivity analyses, we examined whether results differed depending on  
13 methods for gestational age dating, birth anthropometry, or study design.

14 Results: SQ-LNS (vs IFA/SOC) increased birth weight (mean difference: +49g; 95% CI: 26,  
15 71g), duration of gestation (+0.12 wk; 95% CI: 0.01, 0.24 wk), and all birth anthropometric z-  
16 scores (+0.10-0.13 SD); it reduced risk of low birthweight by 11%, newborn stunting by 17%,  
17 newborn wasting by 11%, and small head size by 11%. Only 2 trials compared SQ-LNS and  
18 MMS; birth outcomes did not differ except for a marginal increase in head circumference for  
19 gestational age (+0.11; 95% CI: -0.01, 0.23). Effect estimates for SQ-LNS vs IFA/SOC were  
20 greater among female infants and among women with body mass index  $< 20 \text{ kg/m}^2$ ,  
21 inflammation, malaria, or household food insecurity. Effect estimates for SQ-LNS vs MMS were  
22 greater among female infants, first-born infants, and women  $< 25 \text{ y}$ .

23 Conclusions: SQ-LNS had positive impacts on multiple outcomes compared to IFA/SOC, but  
24 further research directly comparing SQ-LNS and MMS is needed. Targeting SQ-LNS to  
25 vulnerable subgroups may be worth considering. Analysis registered at  
26 [www.crd.york.ac.uk/PROSPERO](http://www.crd.york.ac.uk/PROSPERO) (CRD42021283391).

27 Keywords: Maternal nutrition, low birthweight, preterm birth, fetal growth restriction, balanced  
28 energy protein supplementation, antenatal interventions, infant wasting, infant stunting

29

## 30 Introduction

31 Undernutrition is prevalent among women of reproductive age globally, with an estimated 1.2  
32 billion deficient in one or more micronutrients (1), 571 million (30%) with anemia (2-4), and 170  
33 million (~10%) being underweight (3, 4). As a result, many women and girls enter pregnancy  
34 with nutritional deficits. The risk of undernutrition during pregnancy is exacerbated by the  
35 elevated nutrient needs to support gestation, particularly in low- and middle-income countries  
36 (LMICs) where diets are often inadequate in multiple nutrients (5). This situation contributes to  
37 poor maternal health and the risk of giving birth to a small vulnerable newborn (SVN), an  
38 umbrella term that encompasses small-for-gestational age (SGA), preterm birth, and low  
39 birthweight (LBW) (6). In 2020, 26.2% of all livebirths globally were SVNs, with 16.3% SGA,  
40 8.8% preterm, and 1.1% both SGA and preterm (7). Although poor nutrition is not the only cause  
41 of these outcomes (8), interventions to improve maternal nutrition, such as multiple  
42 micronutrient supplements (MMS) and balanced energy-protein supplementation (BEP) for  
43 undernourished mothers, should be considered critical elements of antenatal care packages aimed  
44 at reducing SVN births (9).

45 Lipid-based nutrient supplements (LNS) provide multiple micronutrients embedded in a food  
46 base that also provides energy, protein and fat. LNS for pregnant women are a type of BEP, as  
47 they meet the criterion that protein contributes < 25% of the energy content (10). The intended  
48 daily ration of LNS can be small- medium- or large-quantity (SQ-, MQ- or LQ-LNS) (11).  
49 Maternal SQ-LNS was designed to fill nutrient gaps during pregnancy and the first 6 mo  
50 postpartum with a daily ration of only 20 g (118 kcal/d) (11), which minimizes cost and potential  
51 displacement of home-prepared foods. SQ-LNS is not primarily designed to fill energy gaps, as  
52 such gaps can be filled by more affordable local foods (11). SQ-LNS provides several key

53 nutrients not provided by iron and folic acid (IFA) supplements or MMS, including essential  
54 fatty acids (EFAs) as well as calcium, magnesium, potassium, and phosphorus (11). This  
55 combination of macro- and micro-nutrients addresses multiple potential nutritional deficiencies  
56 and thus can reduce maternal undernutrition. Maternal SQ-LNS is currently being distributed by  
57 USAID in selected food aid programs (12), but its use is not yet widespread.

58 A previous meta-analysis of maternal LNS (13) demonstrated that LNS given during pregnancy,  
59 compared to IFA, had positive effects on birth weight, length, duration of gestation, SGA, and  
60 newborn stunting. That meta-analysis included 3 trials, all of which used SQ-LNS. In a separate  
61 comparison of LNS vs MMS that also included 3 trials (2 SQ-LNS, 1 MQ-LNS), there were no  
62 significant differences in birth outcomes (13). More recently, Hunter et al. (14) conducted a  
63 meta-analysis of maternal LNS vs MMS that included 4 trials (2 SQ-LNS, 1 MQ-LNS, 1 LQ-  
64 LNS); they found a significant reduction in LBW but not preterm birth or SGA. The authors of  
65 these previous meta-analyses did not have individual participant data (IPD) and thus were not  
66 able to examine individual-level effect modification.

67 Effect modification analysis can provide important insights regarding the potential for  
68 participants to benefit from an intervention, as well as their potential to respond (15). These 2  
69 concepts reflect different attributes, with potential to benefit most likely related to greater deficits  
70 at baseline, and potential to respond related to lack of constraints on exhibiting an improvement  
71 in the outcome due to factors such as infection or inflammation. In some cases, individuals with  
72 greater potential to benefit may also have a lower potential to respond, which can limit the  
73 beneficial impact of an intervention. Identification of subgroups of pregnant women with the  
74 greatest potential to benefit from or respond to LNS can help inform decisions regarding  
75 targeting. We conducted an IPD meta-analysis of randomized controlled trials (RCTs) of SQ-

76 LNS provided to pregnant women that had 2 objectives: 1) to compare overall effects of SQ-  
77 LNS with provision of a) IFA or standard of care (IFA/SOC) or b) MMS, and 2) examine  
78 potential effect modifiers of the impact of SQ-LNS (as compared to either IFA/SOC or MMS) on  
79 birth outcomes.

80

## 81 **Methods**

82 The protocol for this systematic review and IPD meta-analysis was prospectively registered on  
83 PROSPERO (CRD42021283391) (16). The statistical analysis plan (SAP) is available on Open  
84 Science Framework (<https://osf.io/nj5f9/>) (17) and was posted prior to analysis. The protocol was  
85 reviewed by the institutional review board (IRB) of the University of California, Davis and  
86 determined to be exempt from IRB approval given that protocols for each individual trial had  
87 been previously approved by their respective ethical committees.

88

### 89 *Inclusion and exclusion criteria for this IPD meta-analysis*

90 We included prospective randomized controlled trials of maternal SQ-LNS that met the  
91 following study-level inclusion criteria: 1) trial was conducted in a low- or middle-income  
92 country (18), 2) maternal SQ-LNS (~125 kcal/d) was provided for at least part of pregnancy to  
93 intervention group participants, 3) comparison group(s) received iron and folic acid (IFA),  
94 multiple micronutrient supplements (MMS) (defined below) or standard of care (SOC), 4) trial  
95 reported at least one outcome of interest (defined below), and 5) trial used an individual or  
96 cluster randomized design in which the same participants were measured at baseline and endline  
97 (longitudinal follow-up) or different participants were measured at baseline and endline



98 (repeated cross-sectional data collection). Trials were excluded if: 1) severe or moderate  
99 malnutrition was an inclusion criterion for pregnant women to be eligible to participate, 2) study  
100 was conducted with sick or hospitalized populations, 3) the only available comparison group  
101 received other types of non-LNS maternal food supplementation, or 4) SQ-LNS provision was  
102 combined with an additional nutrition-specific intervention within a single arm (e.g. SQ-LNS +  
103 food rations vs. control), and there was no appropriate comparison group that would allow  
104 isolation of the SQ-LNS effect (e.g., food rations alone).

105  
106 For comparisons of SQ-LNS with MMS, MMS was defined as including at least 3  
107 micronutrients (19), and similar in form (e.g. tablet or capsule) to globally used MMS  
108 formulations (20). We used the same exclusion criterion as Smith et al. (19), i.e., excluding  
109 micronutrient powders because they provide additional nutrients compared to MMS tablets that  
110 might have independent effects on the outcomes of interest.

111  
112 *Search methods and identification of studies*

113 We began the search by considering the studies identified by and included in the 2018 Cochrane  
114 systematic review and meta-analysis of the provision of preventive LNS to pregnant women  
115 (13). Then we repeated the database search methods employed in that review to capture any  
116 studies published or registered as a randomized trial between January 2018 and September 2021.  
117 There were no language restrictions. We searched the following international electronic  
118 bibliographic databases: The Cochrane Library (Cochrane Central Register of Controlled Trials,  
119 Cochrane Database of Systematic Reviews), MEDLINE (Ovid, In-Process and Other Non-  
120 Indexed Citations Ovid, Epub ahead of print Ovid), EMBASE (Ovid), CINAHL Complete

121 (EBSCOhost), Web of Science (Social Sciences Citation Index, Science Citation Index,  
122 Conference Proceedings Citation Index-Science, Conference Proceedings Citation Index-Social  
123 Sciences), Epistemonikos (current issue), ClinicalTrials.gov, and WHO International Clinical  
124 Trials Registry Platform. In addition, we searched nine regional databases: IBECS, SciELO  
125 (Scientific Electronic Library Online), AIM (Africa Index Medicus), IMEMR (Index Medicus  
126 for the Eastern Mediterranean Region), LILACS (Latin American and Caribbean Health  
127 Sciences Literature), IRIS (PAHO/WHO Institutional Repository for Information Sharing)  
128 WPRIM (Western Pacific Index Medicus), IMSEAR (Index Medicus for the South-East Asian  
129 Region), and Native Health Research Database.

130

131 After reviewing the titles and abstracts of all studies included in the previous review, as well as  
132 the additional studies identified by the database searches, we selected all potentially relevant  
133 studies for full text review and screened them based on the inclusion and exclusion criteria. After  
134 completing the search, we communicated with investigators of all potentially eligible studies in  
135 progress, regardless of whether the results had been published.

136

### 137 *Data collection and harmonization*

138 We invited the principal investigators of eligible studies published or in progress to participate in  
139 this IPD meta-analysis, and we provided a data dictionary listing definitions of variables  
140 requested. Each contacted investigator provided de-identified individual participant datasets with  
141 those variables to the IPD analyst (CDA), who communicated with investigators to request any  
142 missing variables or other clarifications, as needed.

143

144 *IPD integrity*

145 We conducted a complete-case intention-to-treat analysis (21). We evaluated whether the study  
146 sample sizes in our pooled data set were the same as in study protocols and publications. To  
147 address missing outcome data, we tabulated the percentage of participants lost to follow-up  
148 between enrollment and the assessment of the outcomes for each study. We also assessed  
149 whether missing data were differential with respect to intervention group by comparing rates of  
150 missingness across randomized arms.

151  
152 We flagged biologically implausible values. For anthropometric outcomes, we calculated z-  
153 scores using the 2006 WHO child growth standards (22, 23) and the INTERGROWTH standards  
154 (24), checked the values for acceptable SDs, and flagged implausible values if they were outside  
155 of published WHO acceptable ranges (22, 23). Implausible values were inspected for errors and  
156 either winsorized (25) if within 2 SD of the WHO acceptable ranges or removed from analysis if  
157 clearly impossible on an outcome-by-outcome basis. Such cleaning was necessary for <0.2% of  
158 participants. There was a consistently low rate of implausibility across outcomes and studies. We  
159 also checked summary statistics from the harmonized data-set (e.g., means and SDs) against each  
160 trial's published values.

161  
162 *Assessment of risk of bias in each study and quality of evidence across studies*

163 Two independent reviewers (KRW and CDA) assessed risk of bias in each trial against the  
164 following criteria: random sequence generation and allocation concealment (selection bias),  
165 blinding of participants and personnel (performance bias), blinding of outcome assessment  
166 (detection bias), incomplete outcome data (attrition bias), selective reporting (reporting bias), and

167 other sources of bias (26). Any discrepancies were resolved by discussion or consultation with  
168 the core working group, as needed. KRW, CDA and CPS assessed the quality of evidence for  
169 anthropometric outcomes across all trials based on the 5 Grading of Recommendations  
170 Assessment, Development and Evaluation (GRADE) criteria: risk of bias, inconsistency of  
171 effect, imprecision, indirectness, and publication bias (27).

172

### 173 *Specification of outcomes and effect measures*

174 We prespecified all outcomes in the SAP (17). As shown in **Box 1**, there were 3 categories of  
175 outcomes: 1) birth size and duration of gestation, 2) anthropometric outcomes at 6 mo of age,  
176 and 3) adverse outcomes (miscarriage, stillbirth, Cesarean-section, early neonatal mortality,  
177 neonatal mortality, and 0-6 mo mortality). Continuous birth size outcomes included values in  
178 units of measurement (e.g., birth weight in g; birth length, head circumference and mid-upper  
179 arm circumference (MUAC) in cm), as z-scores (length-for-age z-score (LAZ), weight-for-age z-  
180 score (WAZ), weight-for-length z-score (WLZ), BMI-for-age z-score (BMIZ), and head  
181 circumference-for-age z-score (HCZ)) based on WHO Child Growth Standards at birth (22, 23)),  
182 and as z-scores for gestational age (weight-for-gestational age z-score (WGAZ), length-for-  
183 gestational age z-score (LGAZ) and head circumference-for-gestational age z-score (HCGAZ)  
184 based on INTERGROWTH-21st standards (24)). At birth, BMIZ was used instead of WLZ  
185 because the latter cannot be calculated for children with lengths <45 cm and exclusion of those  
186 infants would create bias; when WLZ can be calculated these 2 variables are highly correlated  
187 ( $r>0.90$ ). For continuous outcomes based on INTERGROWTH-21st standards, we excluded  
188 participants without ultrasound data for calculation of gestational age. Binary birth size outcomes  
189 included low birth weight (LBW, < 2500 g), birth weight < 2000 g, small-for gestational age

190 (SGA, < 10th percentile based on INTERGROWTH-21st), large-for-gestational age (LGA,  
191 >90th percentile based on INTERGROWTH-21st), newborn stunting (LAZ < -2 SD), low LGAZ  
192 (< -2 SD), low BMIZ (< -2 SD), low HCZ (< -2 SD), and low HCGAZ (< -2 SD). Duration of  
193 gestation was expressed in wk, and preterm birth was defined as delivery < 37 wk. For binary  
194 outcomes based on gestational age, we retained participants without ultrasound dating but  
195 conducted a sensitivity analysis in which they were excluded.

196  
197 For continuous outcomes, the principal measure of effect was the mean difference (MD) between  
198 intervention and comparison groups; for binary outcomes it was the relative risk (RR) for birth  
199 outcomes and adverse outcomes, and the prevalence ratio (PR; relative difference in proportions  
200 between groups) for anthropometric outcomes at 6 mo of age. We also estimated the effect for  
201 binary outcomes as the absolute differences between intervention groups in events per 1000  
202 individuals. The absolute differences are useful for assessing public health impact, but we  
203 considered them secondary outcomes because they can be less consistent than RRs or PRs across  
204 studies (26).

205  
206 The comparisons of interest were 1) SQ-LNS vs IFA/SOC and 2) SQ-LNS vs MMS. Study arms  
207 in which SQ-LNS began prior to conception were excluded from the main analyses because the  
208 objectives were to evaluate effects of SQ-LNS when given during pregnancy; however, the pre-  
209 conception study arms were included in sensitivity analyses.

210

211 *Synthesis methods and exploration of variation in effects*

212 We followed the same procedures for analysis as described previously (28), which included  
213 evaluation of full sample main effects of the intervention as well as effect modification by  
214 individual-level characteristics. We had also planned to evaluate effect modification by study  
215 level characteristics (17) but only 4 eligible trials were identified, so there was inadequate  
216 statistical power for study-level effect modification; thus those analyses are not described herein.

217  
218 Briefly, we followed a two-stage meta-analysis approach (29). In the first stage, intervention  
219 effect estimates (or effect modification interaction term estimates) were generated within each  
220 individual study according to its study design. In the second stage, the first-stage estimates were  
221 pooled using both inverse-variance fixed effects and random effects.

222  
223 The individual-level characteristics considered as potential effect modifiers were similar to those  
224 included in our previous IPD meta-analysis of trials using child SQ-LNS (28). The potential  
225 effect modifiers for this analysis are shown in **Box 2**.

226  
227 We assessed heterogeneity of effect estimates using  $I^2$  and  $\text{Tau}^2$  statistics, within strata when  
228 relevant (30). We used a P value  $<0.05$  for main effects and a p-for-interaction  $< 0.10$  for effect  
229 modification by individual-level characteristics. Given that the birth outcomes are highly  
230 correlated and the effect modification analyses are inherently exploratory, we did not adjust for  
231 multiple hypothesis testing because doing so may be unnecessary and counterproductive (31).

232

### 233 *Additional sensitivity analyses*

234 We pre-specified several sensitivity analyses:

- 235 • Exclusion of trials with a high level of missingness (>20%) of outcome data relative to  
236 enrollment for pregnancy outcomes and relative to live births for later outcomes.
- 237 • For outcomes that rely on gestational age, exclusion of individuals for whom there is no  
238 ultrasound dating of the gestational age of the fetus.
- 239 • For birth outcomes (e.g., infant anthropometry), exclusion of individuals for whom data  
240 were collected >72 hours after birth.
- 241 • Exclusion of studies in which additional LNS was provided to certain mothers (e.g., those  
242 with low BMI or gestational weight gain).
- 243 • Inclusion of trials/arms that provided SQ-LNS prior to conception (pooled main effects  
244 only).

245

## 246 **Results**

### 247 *Literature search and study characteristics*

248 We identified 4 trials that met our selection criteria and were completed in time to be included in  
249 our analyses, all of which provided IPD (**Figure 1, Table 1**). The trials were conducted in  
250 Bangladesh (32), Ghana (33), Malawi (34), and Guatemala (35) between 2009 and 2017. The  
251 Guatemala study was one of 4 sites in the Women First trial (35). In that trial, an unfortified LNS  
252 (in addition to SQ-LNS) supplying 300 kcal/d was provided to intervention group women who  
253 were either underweight or who had inadequate gestational weight gain. In 3 of the 4 study sites  
254 (Democratic Republic of the Congo, India, and Pakistan), >90% of enrolled women in the  
255 intervention groups received this supplement in addition to SQ-LNS, so the total amount of LNS  
256 provided to them was ~418 kcal/d, which would be categorized as MQ-LNS rather than SQ-

257 LNS. Therefore, only the Guatemala site is included in these analyses (where < 10% of enrolled  
258 women received the unfortified LNS in addition to SQ-LNS).

259  
260 All 4 trials provided data for the comparison of SQ-LNS vs IFA/SOC; in 3 trials IFA was  
261 provided to this comparison group (32-34), and in 1 trial (Guatemala) the comparison group  
262 received SOC (biweekly visits to monitor pregnancy status) (35). Two of the 4 trials (Ghana and  
263 Malawi) also included an arm that received MMS and thus provided data for the comparison of  
264 SQ-LNS vs MMS (33, 34). In Ghana and in the “complete follow-up” cohort in Malawi (who  
265 received supplementation beyond pregnancy, see Table 1), SQ-LNS and MMS were provided  
266 until 6 mo postpartum and IFA was provided until delivery followed by placebo (low dose  
267 calcium) until 6 mo postpartum; in the “simplified follow-up” cohort in Malawi  
268 (supplementation only during pregnancy), SQ-LNS, MMS or IFA were provided only until  
269 delivery (33, 34). In Bangladesh, SQ-LNS was provided until 6 mo postpartum and IFA until 3  
270 mo postpartum (32), and in Guatemala, SQ-LNS was provided only until delivery (35). The  
271 nutrient composition of SQ-LNS was nearly identical across trials (**Supplemental Table 1**),  
272 except for more vitamin D and less zinc in the version used in Guatemala. The MMS used in  
273 Ghana and Malawi was a formulation designed to match the micronutrient content of the SQ-  
274 LNS (11), which was based in part on results of a trial in Guinea-Bissau (36) that demonstrated a  
275 greater impact on birth weight when the MMS contained 2X (vs 1X) the recommended dietary  
276 allowance of most of the nutrients (except for iron, folic acid and vitamin A). Thus, the MMS  
277 used in Ghana and Malawi had higher levels of most of the micronutrients compared to the  
278 United Nations International Multiple Micronutrient Antenatal Preparation (UNIMMAP) (37).

279



280 Mean gestational age when prenatal supplementation began was ~12 wk in Guatemala, ~13 wk  
281 in Bangladesh, and 16-17 wk in Ghana and Malawi (**Table 1**). Mean maternal age was lowest in  
282 Bangladesh (~22 y) and 24-27 y in the other sites. Mean maternal BMI was lowest in  
283 Bangladesh (20.1 kg/m<sup>2</sup>) and Malawi (20.5 kg/m<sup>2</sup>), and was considerably higher in Ghana and  
284 Guatemala (~24-25 kg/m<sup>2</sup>). The proportion of women who were nulliparous at enrollment was  
285 highest in Bangladesh and lowest in Guatemala. In the 3 sites in which household food insecurity  
286 was assessed (Ghana, Malawi and Bangladesh), the percentage reporting moderate or severe  
287 food insecurity ranged from 30% in Ghana to 66% in Malawi. Additional information on  
288 maternal, child and household characteristics is available in **Supplemental Table 2**.

289

290 The study populations differed with regard to risk of adverse birth outcomes, with Bangladesh  
291 having the highest incidence (in the IFA/SOC group) of LBW (37%), SGA (59%), newborn  
292 stunting (23%), low BMIZ (34%) and preterm birth (14%) (**Supplemental Table 3**). The  
293 incidence of these outcomes in the IFA/SOC groups in the other 3 sites was 13-14% for LBW,  
294 22-27% for SGA, 10-17% for newborn stunting, 6-11% for low BMIZ, and 8-12% for preterm  
295 birth. Study-level data on anthropometric outcomes at 6 mo of age and adverse outcomes in the  
296 IFA/SOC groups are available in **Supplemental Tables 4-5**.

297

298 All trials were judged to have low risk of bias for 6 of the 7 categories: random sequence  
299 generation, allocation concealment, outcome assessment (except for 1 trial labeled “unclear”),  
300 incomplete outcome, selective reporting, and “other” (**Supplemental Table 6 and Supplemental**  
301 **Figure 1**). All trials had a high risk of bias for blinding of participants, as blinding was not  
302 possible given the physical difference in the supplements provided.

303

304 ***SQ-LNS vs IFA/SOC***

305 *Main effects*

306 For most birth outcomes, all 4 trials contributed to the pooled effect estimates and the total  
307 sample size was 4,922-5,348 (**Table 2**). For continuous birth outcomes based on  
308 INTERGROWTH-21st standards, we excluded participants without ultrasound data, as  
309 mentioned above, and as a result only 3 trials contributed to the estimates for WGAZ, LGAZ and  
310 HCGAZ (total n ~1,460-1,717).

311 Maternal SQ-LNS had a significant positive effect on all of the continuous birth outcomes, with  
312 a MD compared to IFA/SOC of +49 g for birth weight, +0.2 cm for birth length, +0.10-0.13 z-  
313 scores for WAZ, WGAZ, LAZ, LGAZ, BMIZ, HCZ, and HCGAZ, +0.08 cm for MUAC, and  
314 +0.12 wk for duration of gestation. Maternal SQ-LNS reduced the risk of LBW by 11%,  
315 newborn stunting by 17%, low BMIZ by 11%, and low HCZ by 11%. Effect estimates for the  
316 other binary birth outcomes were not statistically significant but were in the same direction  
317 (except for LGA, RR 1.00 (0.61, 1.65)).

318 We rated the quality of the evidence for all birth outcomes as moderate based on the GRADE  
319 criteria listed in the Methods: 3-4 RCTs were available for all outcomes, risk of bias was low  
320 except for blinding of participants, heterogeneity was low, precision was rated as high because  
321 all trials had sample sizes > 400, all trials were directly aimed at evaluating SQ-LNSs, and funnel  
322 plots revealed no indication of publication bias.

323 In general, there was consistency across studies in the direction of effects, with very low  
324 heterogeneity based on  $I^2$  values (**Figures 2A-F** for birth weight, LBW, newborn LAZ, newborn

325 HCZ, newborn BMIZ and duration of gestation; **Supplemental Figures 2A-BM** for all  
326 outcomes). Low  $I^2$  values may be attributable to relatively wide CIs for some of the point  
327 estimates rather than low variability in the RRs. For nearly all outcomes, fixed effects and  
328 random-effects models generated identical estimates.

329 With regard to the sensitivity analyses, no trials had a high level of missingness of outcome data,  
330 so no sensitivity analyses for that reason were needed. When including only ultrasound dating  
331 for outcomes dependent on gestational age (which excluded the Bangladesh trial), the magnitude  
332 of the effect estimates increased but effects remained non-significant: RR=0.86 (0.73, 1.01) for  
333 SGA (n=1,717), MD=0.15 (-0.03, 0.33) for duration of gestation (n=1,880) and RR=0.90 (0.68,  
334 1.18) for preterm birth (n=1,880) (**Supplemental Table 7A**). For the other sensitivity analyses,  
335 restricting birth size outcomes to data collected within 72 h of birth, or excluding the Guatemala  
336 trial (in which some women received additional LNS), or including the pre-conception arm of  
337 the Guatemala trial, there was very little change in the findings.

338  
339 For most of the effects of SQ-LNS vs IFA/SOC on anthropometric outcomes at 6 mo of age, all  
340 4 trials contributed to the pooled estimates and the total sample size was ~5,030; outcomes based  
341 on MUACZ were not available for Guatemala (**Table 3**). Maternal SQ-LNS reduced  
342 underweight at 6 mo (PR 0.85 (0.73, 0.99)), but effects on the other outcomes were not  
343 statistically significant. In sensitivity analyses, the PR for underweight became non-significant  
344 when Guatemala was excluded (0.96 (0.80, 1.16)) (with or without exclusion of the “simplified  
345 follow-up” cohort in Malawi; in this cohort and in Guatemala, maternal supplementation did not  
346 continue after delivery). The PR for underweight was not strengthened when the pre-conception

347 arm was included for Guatemala (0.90 (0.78, 1.13)). For other outcomes, these sensitivity  
348 analyses did not substantively alter the findings (**Supplemental Table 7B**).

349  
350 There were no significant differences in any of the adverse outcomes for the SQ-LNS vs  
351 IFA/SOC comparison, and the RR was generally  $\leq 1$  except for incidence of stillbirths (**Table 4**).  
352 Because of uncertainty in gestational age dating, it is sometimes difficult to distinguish between  
353 miscarriage and stillbirths (i.e., before vs. after 28 wk gestation), and in low resource settings it  
354 can also be difficult to differentiate between stillbirth and early neonatal death (34). For these  
355 reasons, Table 4 includes comparisons for 2 composite variables for these outcomes (miscarriage  
356 or stillbirth; miscarriage or stillbirth or early neonatal mortality). The RRs for those composite  
357 adverse outcomes were both  $< 1.0$ . Adverse outcome findings were similar in the sensitivity  
358 analyses (**Supplemental Table 7C**).

359  
360 *Effect modification by individual-level characteristics*

361 For several characteristics, the p-for-interaction was  $> 0.10$  for all or almost all infant birth  
362 outcomes, i.e., effect modification was generally not evident for child birth order, maternal  
363 height, education, or anemia at baseline, gestational age at start of supplementation, compliance  
364 with supplementation, household socio-economic status or sanitation (see **Supplemental**  
365 **Figures 3A-N** for results stratified by all characteristics). For 5 characteristics, the p-for-  
366 interaction was  $< 0.10$  for at least 2 birth outcomes, and data from at least 3 trials were available  
367 (**Figures 3A-J** show 12 selected birth outcomes for each of these characteristics, though the  
368 number of outcomes for which p-for-interaction was  $< 0.10$  varied). The estimated effects of  
369 maternal SQ-LNS on birth outcomes were greater among a) female (vs. male) infants, for birth

370 weight, WAZ, LBW, birth weight < 2 kg, BMIZ, low BMIZ, HCZ, duration of gestation, and  
371 preterm birth; b) women with lower BMI (< 20 vs.  $\geq 20$  kg/m<sup>2</sup>), for MUAC and low infant HCZ;  
372 c) younger women (< 25 vs.  $\geq 25$  y), for duration of gestation and birth weight <2 kg (although a  
373 greater effect on SGA was seen among women  $\geq 25$  y); d) women with inflammation at baseline  
374 (vs. without inflammation), for WAZ (Supplemental Figure 3H1), duration of gestation and low  
375 infant HCZ; and e) women with greater household food insecurity (moderate to severe vs. mild  
376 or secure), for birth length (Supplemental Figure 3M1), LAZ, head circumference (Supplemental  
377 Figure 3M1) and newborn stunting. Only 2 trials had information on maternal malaria at  
378 baseline, but in those trials the effect estimates for maternal SQ-LNS were greater among women  
379 with a positive rapid test for malaria at baseline (vs. those with a negative test) for birth weight,  
380 WAZ, LBW and SGA (Supplemental Figures 3I1-2). In sensitivity analyses including only  
381 ultrasound dating for outcomes dependent on gestational age (**Supplemental Table 8**), the  
382 interaction with child sex was still evident for duration of gestation but not preterm birth; the  
383 interaction with maternal age was still significant (and stronger) for duration of gestation but not  
384 for SGA; the interaction with maternal inflammation became weaker for duration of gestation;  
385 and there was no change in the interaction with maternal malaria for SGA. In sensitivity analyses  
386 restricted to anthropometric outcomes assessed within 72 h of birth, results were generally  
387 stronger for the interactions with child sex and maternal inflammation, similar for maternal BMI,  
388 age, and household food insecurity, and weaker for maternal malaria (for birth weight and LBW,  
389 but not SGA). The other sensitivity analyses (e.g., exclusion of the Guatemala study) did not  
390 substantively alter the results of the effect modification analyses (available at <https://osf.io/nj5f9/>  
391 (17)).

392 We explored whether the greater effect of SQ-LNS on birth size outcomes among females (vs.  
393 males) could be attributed mainly to the mediating effects on duration of gestation: when  
394 including duration of gestation in the models, the p-for-interaction was  $> 0.10$  for birth weight,  
395 WAZ, BMIZ and HCZ but remained  $< 0.10$  for LBW, birth weight  $< 2$  kg, and low BMIZ  
396 (available at [https://osf.io/nj5f9/\(17\)](https://osf.io/nj5f9/(17))).

397 Some of the above characteristics also modified the effect estimates for maternal SQ-LNS vs.  
398 IFA/SOC with respect to infant anthropometric outcomes at 6 mo, particularly infant sex. Effect  
399 estimates were larger for females than for males, as was the case for the birth outcomes (**Figure**  
400 **4**). Among females, maternal SQ-LNS was associated with a 26% reduction in underweight and  
401 a 30% reduction in low HCZ, whereas there was no reduction among males. These findings were  
402 very similar in the sensitivity analyses excluding Guatemala (with or without exclusion of the  
403 “simplified follow-up” cohort in Malawi) (available at [https://osf.io/nj5f9/\(17\)](https://osf.io/nj5f9/(17))). For 3 other  
404 characteristics, the p-for-interaction was  $< 0.10$  for at least 2 distinct infant outcomes at 6 mo.  
405 Effect estimates for maternal SQ-LNS were greater among a) women with greater food  
406 insecurity, for LAZ and underweight at 6 mo (**Supplemental Figures 3M3-4**); b) women with  
407 improved sanitation, for WAZ and WLZ at 6 mo (**Supplemental Figure 3N3**); and c) later-born  
408 children, for underweight and stunting at 6 mo (**Supplemental Figure 3B4**).

409 **Supplemental Figures 4A-N** present pooled estimates for adverse outcomes, stratified by  
410 potential individual-level effect modifiers. For many of the potential effect modifiers, the p-for-  
411 interaction was  $> 0.10$  for all of the adverse outcomes; for several other potential effect  
412 modifiers, the p-for-interaction was  $< 0.10$  for only one adverse outcome, and for that outcome  
413 the difference between SQ-LNS and IFA/SOC groups was not significant in either subgroup. For  
414 birth order, the p-for-interaction was  $< 0.10$  for 2 outcomes: neonatal mortality and mortality 0-6

415 mo. In both cases, the stratum-specific estimates were not significant: neonatal and 0-6 mo  
416 mortality RRs were respectively 0.54 (0.27, 1.06) and 0.60 (0.32, 1.15) among first-born infants,  
417 and 1.08 (0.69, 1.70) and 1.22 (0.86, 1.73) among later-born infants. These results were similar  
418 in the sensitivity analyses (available at <https://osf.io/nj5f9/> (17)).

## 419 *SQ-LNS vs MMS*

### 420 *Main effects*

421 Effects of SQ-LNS vs MMS on birth outcomes are based on 2 trials and a total sample size of  
422 1,121-1,539 (**Table 5**). There were marginally significant differences in head circumference  
423 (+0.14 (-0.02, 0.31) cm) and HCGAZ (+0.11 (-0.01, 0.23)) favoring the SQ-LNS group, but p-  
424 values for all other outcomes were > 0.10. There was low heterogeneity, and fixed effects and  
425 random-effects models generated nearly identical estimates (**Figures 5A-C** and **Supplemental**  
426 **Figures 5A-AF**). We rated the quality of the evidence for all outcomes as low because data were  
427 available for only 2 trials, both conducted in Africa.

428 Most of the pre-planned sensitivity analyses were not applicable to these 2 trials, except for the  
429 one restricting birth size outcomes to data collected within 72 h of birth. In that sensitivity  
430 analysis, there was little change in the results except that the MDs for head circumference (+0.21  
431 (-0.03, 0.45)) and HCGAZ (+0.16 (-0.01, 0.34)) became larger (though still marginally  
432 significant).

433 **Table 6** shows that there were no significant effects of SQ-LNS vs MMS on anthropometric  
434 outcomes at 6 mo of age. Findings were not altered when excluding the “simplified cohort  
435 follow-up” in Malawi. **Table 7** shows no significant differences in adverse outcomes for the SQ-  
436 LNS vs MMS comparison.

437 *Effect modification by individual-level characteristics*

438 For most characteristics, the p-for-interaction was  $> 0.10$  for all infant birth outcomes, i.e., effect  
439 modification was not evident for maternal height, BMI, education, or anemia at baseline,  
440 gestational age at start of supplementation, compliance with supplementation, household socio-  
441 economic status, food insecurity, or sanitation (**Supplemental Figures 6A-M**). The p-for-  
442 interaction was  $< 0.10$  for at least 1 birth size outcome for 5 characteristics: child sex, birth order,  
443 maternal age, inflammation at baseline, and malaria at baseline. Effect modification estimates for  
444 maternal SQ-LNS vs MMS were greater (p-for-interaction  $< 0.10$ ) among a) female (vs. male)  
445 infants for head circumference, HCZ, birth weight  $< 2$  kg, SGA, low BMIZ and low HCZ  
446 (Supplemental Figures 6A1-2), b) first-born (vs. later-born) infants for birth weight and WAZ  
447 (Supplemental Figure 6B1), and c) younger women ( $< 25$  vs.  $> 25$  y) for SGA (Supplemental  
448 Figure 6E). Effect modification by maternal inflammation was difficult to interpret: effect  
449 estimates for maternal SQ-LNS vs. MMS were greater among women with inflammation for  
450 birth weight, but greater among those without inflammation for HCZ and HCGAZ  
451 (Supplemental Figure 6H1). Results for effect modification by maternal malaria were not  
452 interpretable because they could not be confirmed in the sensitivity analysis restricted to  
453 anthropometric outcomes measured within 72 h of birth, due to insufficient sample sizes in the  
454 subgroup with malaria at enrollment. Results of the sensitivity analysis restricted to birth size  
455 measured within 72 h for effect modification by child sex, birth order and maternal age are  
456 available at <https://osf.io/nj5f9/> (17); the findings were similar but for some outcomes the sample  
457 sizes in certain subgroups were insufficient to generate effect estimates.



458 Some of the above characteristics also modified the effect estimates for maternal SQ-LNS vs.  
459 MMS with regard to a few of the anthropometric outcomes at 6 mo, but the results were not  
460 always consistent across outcomes (Supplemental Figures 6A3&4-6M3&4).

461 For most of the adverse outcomes, statistical power to examine effect modification was low  
462 because they are rare events and the total sample size for this comparison, with both trials  
463 combined, was  $\leq 1,566$ .

464

465

## 466 **Discussion**

467 In this IPD meta-analysis, data from 4 trials showed that maternal SQ-LNS, compared to IFA or  
468 SOC, increased mean birth weight, length, head circumference, BMIZ, MUAC and duration of  
469 gestation, and on average reduced the incidence of LBW by 11%, newborn stunting by 17%,  
470 newborn wasting (low BMIZ) by 11%, and small head size (low HCZ) by 15%. Only 2 trials  
471 directly compared maternal SQ-LNS and MMS; birth outcomes did not differ significantly  
472 between these groups, although there was a marginally significant difference in newborn head  
473 circumference. Several individual-level characteristics appeared to modify the impact of  
474 maternal SQ-LNS. For the comparison with IFA or SOC, effect estimates for SQ-LNS were  
475 greater among female infants and among women with BMI  $< 20 \text{ kg/m}^2$ , inflammation or malaria  
476 at enrollment, or greater household food insecurity. For the comparison with MMS, effect  
477 estimates for SQ-LNS were greater among female infants, first-born infants, and women  $< 25 \text{ y}$   
478 of age. Some of these findings may have implications with regard to potential targeting of SQ-  
479 LNS to vulnerable women, as discussed below.

480 Main effects on birth outcomes and adverse outcomes

481 For SQ-LNS vs IFA/SOC, our estimated main effects for birth outcomes are similar to those of  
482 Das et al. (13), which is expected because their analysis included 3 of the 4 trials in our IPD  
483 analysis. We report on several birth outcomes not included in the Das et al. meta-analysis:  
484 newborn BMIZ and low BMIZ, and birth size for gestational age outcomes using the  
485 INTERGROWTH-21st standard. The MD in birth weight was 49 g, which is similar to the  
486 estimated impact of other types of BEP (10). The RR of 0.89 for LBW translates into an  
487 estimated absolute difference of ~29 events per 1000 births. For newborn stunting, wasting, and  
488 small head size, the estimated absolute differences are 32, 24 and 22 events per 1000 births,  
489 respectively. For SGA (RR 0.96 (0.92, 1.01)), the upper bound of the 95% CI slightly exceeded  
490 1.0; in a sensitivity analysis restricted to results based on ultrasound dating of gestational age  
491 (which required exclusion of the largest trial, in Bangladesh), the RR was more substantial but  
492 the upper bound of the 95% CI did not change (0.86 (0.73, 1.01)). The RR for preterm birth was  
493 not significant in the main analysis (0.94 (0.80, 1.10)) or in the sensitivity analysis restricted to  
494 ultrasound dating (0.90 (0.68, 1.18)). The effect estimates for birth size z-scores for gestational  
495 age (+0.13 in WGAZ, +0.13 in LGAZ, and +0.11 in HCGAZ) were similar to those for WAZ  
496 (+0.12), LAZ (+0.11) and HCZ (+0.10), suggesting that the impact of SQ-LNS on birth size was  
497 mainly attributable to improvements in fetal growth.

498 For SQ-LNS vs MMS, we cannot directly compare our estimated main effects to those of Das et  
499 al. (13) because their analysis included 1 MQ-LNS trial in addition to the 2 SQ-LNS trials that  
500 are in our IPD meta-analysis. Although neither meta-analysis showed significant differences in  
501 birth outcomes between (SQ-)LNS and MMS groups, the MDs for all of the birth size outcomes  
502 in our IPD analysis were in the same direction as those for the SQ-LNS vs IFA/SOC analysis,

503 though generally of lower magnitude except for the MD in head circumference (which was  
504 almost identical between the SQ-LNS vs MMS and SQ-LNS vs IFA/SOC comparisons, e.g.,  
505 HCGAZ +0.11 (-0.01, 0.23) and +0.11 (0.02, 0.20), respectively).

506 Because only 2 trials have directly compared SQ-LNS with MMS, it is useful to examine how  
507 the estimated effects of SQ-LNS vs IFA/SOC compare with those of MMS vs IFA in previous  
508 meta-analyses, which included a large number of trials (19, 38). Effects of MMS vs IFA on mean  
509 birth weight (+48 (40, 57) g in Smith et al. (19)) and RR for LBW (0.86-0.88) (19, 38) are quite  
510 similar to those shown for SQ-LNS vs IFA/SOC herein, and the results for SGA and preterm  
511 birth are also similar. However, we have demonstrated positive effects of SQ-LNS on newborn  
512 LAZ, stunting, HCZ, and small HCZ, whereas these outcomes have not been reported in the  
513 MMS vs IFA meta-analyses. The MD for head circumference in the SQ-LNS vs MMS  
514 comparison suggests that the differences in nutrient composition between these two supplements  
515 (e.g., inclusion of EFAs, calcium in SQ-LNS) may influence certain parameters of fetal growth,  
516 even if effects on birth weight are similar.

517 In both the SQ-LNS vs IFA/SOC and SQ-LNS vs MMS comparisons, we did not find significant  
518 differences in incidence of Caesarian-section, miscarriage, stillbirths, early neonatal mortality,  
519 neonatal mortality or mortality from birth to 6 mo of age, although it should be noted that the  
520 statistical power to detect differences in some of these rare outcomes was particularly limited.

#### 521 Effect modification for birth outcomes

##### 522 *SQ-LNS vs IFA/SOC*

523 The impact of SQ-LNS was greater among female than among male infants for many of the birth  
524 outcomes. Among females, effect estimates for SQ-LNS suggested reductions of 20% for LBW,

525 24%, for newborn stunting, 22% for newborn wasting and 17% for small head size, and an  
526 increase in duration of gestation of +0.3 (0.15, 0.45) wk. In exploratory analyses, we found that  
527 the effects on birth size were only partially explained by the increased duration of gestation,  
528 suggesting that among female fetuses, SQ-LNS influenced both of the pathways leading to  
529 SVNs, i.e., “born too soon” and “born too small” (6). It is noteworthy that child sex did not  
530 modify the effects of MMS (vs IFA) on LBW or SGA (19). It is unclear why the effects of SQ-  
531 LNS were stronger among female fetuses. In our previous IPD meta-analysis of SQ-LNS  
532 provided directly to infants and young children 6-23 mo of age, we also found a greater impact  
533 among females than among males for child stunting, wasting and small head size (15), as well as  
534 anemia (39). We interpreted this as a greater potential to respond to nutritional interventions  
535 among females than among males (15). Males are more vulnerable to environmental stressors  
536 (40, 41), and are at higher risk of morbidity and mortality in early life, which could constrain  
537 their response to nutrition interventions. Our results suggest that this vulnerability begins prior to  
538 birth and is thus likely to be biologically rather than socially driven.

539 For some outcomes, effects of SQ-LNS were greater among mothers with a low BMI at  
540 enrollment than among those with  $\text{BMI} \geq 20 \text{ kg/m}^2$ . The p-for-interaction was significant only  
541 for low HCZ and mean MUAC but effect estimates were also somewhat larger among low BMI  
542 mothers for most of the other birth size outcomes (though not for duration of gestation or preterm  
543 birth). Among mothers with low BMI, effect estimates for SQ-LNS suggested reductions of 23%  
544 for newborn small head size and 20% for newborn stunting. This could be interpreted as a  
545 greater potential to benefit among infants of low BMI mothers.

546 Similarly, effects of SQ-LNS were greater among infants of women with inflammation or  
547 malaria at enrolment. For inflammation, the p-for-interaction was significant for WAZ, duration

548 of gestation and small head size and there was a similar pattern for several other birth outcomes.  
549 Among women with inflammation, effect estimates for SQ-LNS suggested reductions of 33% for  
550 LBW, 31% for newborn stunting, 33% for newborn wasting and 40% for small head size. For  
551 malaria, the p-for-interaction was significant for birth weight, WAZ, LBW, and SGA. Among  
552 women with malaria, effect estimates for SQ-LNS suggested reductions of 47% for LBW and  
553 40% for SGA. These are large relative reductions in the risk of being “born too small”, and  
554 suggest that SQ-LNS may be mitigating the adverse effects of maternal inflammation and  
555 possibly malaria on fetal growth (42, 43).

556 Effects of SQ-LNS were also greater among women in households with moderate-to-severe food  
557 insecurity than in those with less food insecurity. The p-for-interaction was significant for birth  
558 length, LAZ, newborn stunting, and head circumference (in cm) and there was a similar pattern  
559 for several other birth outcomes. Among women with greater food insecurity, effect estimates for  
560 SQ-LNS suggested reductions of 16% for LBW and 25% for newborn stunting. These findings  
561 suggest a greater potential to benefit among women with food insecurity, perhaps because they  
562 are at greater risk of nutrient inadequacy.

563 Effects of SQ-LNS on birth size outcomes tended to be greater among infants of mothers who  
564 consumed supplements  $\geq 4$  days/wk than in those with lower compliance, although the p-for-  
565 interaction was significant only for stunting. Among women with higher compliance, effect  
566 estimates for SQ-LNS suggested reductions of 16% for LBW, 22% for newborn stunting, 14%  
567 for newborn wasting, and 18% for small head size.

568 Effect modification was generally not evident for other maternal characteristics. This could be  
569 important, as it suggests that a response to maternal SQ-LNS is not constrained by short maternal  
570 stature, low education, anemia at baseline, later gestational age at start of supplementation, or

571 low household socio-economic status. In the IPD meta-analysis of MMS vs IFA (19), there was a  
572 greater impact of MMS on SGA among women with more education, compared to those with  
573 less education. This type of interaction was not observed for SQ-LNS. The lack of interaction of  
574 SQ-LNS with maternal anemia is also noteworthy because the iron content of SQ-LNS (20 mg)  
575 was much lower than that of IFA (60 mg) in these trials. Although this difference in iron content  
576 may influence the risk of maternal iron-deficiency anemia (44-46), it does not appear to  
577 compromise the impact of maternal SQ-LNS on infant outcomes (47).

578

#### 579 *SQ-LNS vs MMS*

580 As was found for the comparison of SQ-LNS vs IFA/SOC, effect estimates for SQ-LNS vs MMS  
581 were greater among female than among male infants. The p-for-interaction with infant sex was  
582 significant for several outcomes (HCZ, SGA, birth weight < 2 kg, low BMIZ, and small head  
583 size), and the effect estimates for SQ-LNS were significant among females for LGAZ (+0.17  
584 (0.00, 0.33)), HCZ (+0.21 (0.01, 0.40)) and HCGAZ (+0.19 (0.02, 0.37)). It is noteworthy that  
585 these differences between intervention groups among females are for outcomes that reflect linear  
586 growth and head size, and may be attributable to the differences in nutrient content between SQ-  
587 LNS and MMS, particularly EFAs (important for brain development) (48) and minerals such as  
588 calcium, potassium and magnesium (important for linear growth).

589 Effects of SQ-LNS vs MMS appeared to be greater among first-born than among later-born  
590 infants. The p-for-interaction was significant for birth weight and WAZ, and among first-born  
591 infants the effect estimates for SQ-LNS were substantial for birth weight (+120 (35, 205) g) and  
592 HCZ (+0.31 (0.05, 0.58)). However, there was heterogeneity between the 2 sites for this

593 interaction, with results being driven by greater effects of SQ-LNS among first-born infants in  
594 Ghana but not in Malawi.

595 Effects of SQ-LNS on SGA were more beneficial among younger women than among those  $\geq 25$   
596 y, and there was a similar pattern for other birth outcomes. Among infants of younger mothers,  
597 effect estimates for SQ-LNS vs MMS were significant for birth weight (+69 (4, 135)), WAZ  
598 (+0.16 (0.01, 0.31)), and HCZ (+0.20 (0.00, 0.40)). This could reflect a greater potential to  
599 benefit among infants of younger mothers (who are also more likely to be first-born), among  
600 whom improved intake of EFAs and certain minerals could be more critical.

#### 601 Effects on anthropometric status at 6 mo

602 An important biological and programmatic question is whether prenatal supplementation has a  
603 sustained impact on infant growth status after birth. Previous evidence on this question has been  
604 mixed (49). In this meta-analysis, maternal SQ-LNS (compared to IFA or SOC) reduced the  
605 prevalence of underweight at 6 mo of age by 15%, but effects on the other anthropometric  
606 outcomes were not statistically significant. Among female infants, underweight at 6 mo was  
607 reduced by 26%, whereas no effect was observed among male infants. In 3 cohorts (Bangladesh,  
608 Ghana and half of the Malawi cohort), mothers continued to receive supplements after delivery  
609 for up to 6 mo, so it is possible that some of the impact on infant underweight at 6 mo is  
610 attributable to postpartum effects, e.g., through breast milk composition or maternal caregiving  
611 capacity. However, when we excluded the two cohorts in which mothers did not continue to  
612 receive supplements postpartum (Guatemala and half of the Malawi cohort), the effect estimate  
613 for underweight was weaker rather than stronger, suggesting that the reduction in underweight is  
614 likely related to SQ-LNS received prenatally. This is an important finding because underweight  
615 among infants is a key risk factor for mortality (50-52).

616 There were no significant differences in infant anthropometric status at 6 mo in the comparison  
617 of SQ-LNS vs MMS.

### 618 Strengths and limitations

619 Strengths of this IPD meta-analysis include the high quality of the randomized controlled trials  
620 contributing to the estimates, data from diverse settings on 3 different continents, and the  
621 consistency in findings between fixed-effects and random-effects models as well as in most of  
622 the sensitivity analyses. Limitations include the relatively small number of trials (especially for  
623 the SQ-LNS vs MMS comparison), and limited statistical power to detect differences in rare  
624 outcomes. Results of the effect modification analyses should be interpreted with caution because  
625 many of the potential effect modifiers are interrelated and also may be confounded by other  
626 unmeasured factors. In addition, there was variation in the methods used in each study to assess  
627 certain potential effect modifiers such as household food insecurity and socio-economic status.

628

### 629 Conclusions and implications

630 Maternal SQ-LNS has substantial positive effects on birth outcomes when compared with IFA or  
631 SOC, especially among female infants and among vulnerable women such as those with low  
632 BMI, inflammation or malaria at enrollment, or greater household food insecurity. Provision of  
633 SQ-LNS to pregnant women may also reduce the prevalence of underweight among infants at 6  
634 mo of age. An important programmatic question is whether maternal SQ-LNS is superior to  
635 MMS, which is lower in cost and is currently being scaled-up (53, 54). Based on this meta-  
636 analysis as well as the meta-analyses of MMS (19, 38), we conclude that SQ-LNS and MMS  
637 have similar positive effects on birth weight outcomes when comparing each with IFA.



638 However, it is not known whether MMS has an impact on newborn LAZ, stunting, BMIZ,  
639 wasting, HCZ, or small HCZ, all of which were improved in the SQ-LNS vs IFA/SOC  
640 comparisons herein. With only 2 trials directly comparing SQ-LNS and MMS, the statistical  
641 power to detect differences between intervention groups was considerably lower than was the  
642 case for the SQ-LNS vs IFA/SOC comparison. Moreover, the MMS used in those 2 trials had  
643 1.5-2 times the amounts of most micronutrients compared to the MMS formulation currently  
644 being scaled up (UNIMMAP), which may have reduced the likelihood of detecting differences in  
645 birth outcomes between the SQ-LNS and MMS groups. Further trials that include this  
646 comparison are needed.

647 It is possible that the impact of SQ-LNS on certain birth outcomes is superior to that of MMS  
648 within vulnerable populations, even if the main effects on those outcomes do not differ  
649 significantly in the general population. For example, among infants of women < 25 y of age,  
650 birth weight and head circumference were greater in the SQ-LNS group, compared to MMS. As  
651 mentioned above, effects of SQ-LNS vs IFA/SOC were largest in more vulnerable women,  
652 whereas effects of MMS (vs IFA) on birth size (LBW or SGA) have not been shown to differ in  
653 such subgroups (i.e., younger women, those with low BMI) (19). The MMS vs IFA IPD meta-  
654 analysis did not include household food insecurity or maternal inflammation as potential effect  
655 modifiers.

656 The large and consistent impact of SQ-LNS (vs IFA/SOC) among women with one or more  
657 biomarkers of inflammation at enrollment on several different metrics of fetal growth (ponderal,  
658 linear and head size) is noteworthy, given that the percentage of women in this subgroup was  
659 40.8% in Ghana, 45.9% in Malawi and 16.6% in Bangladesh (this information was not available

660 for Guatemala). These findings suggest a greater potential to benefit from maternal SQ-LNS  
661 among such women. The mechanisms underlying these findings require further investigation.  
662 Further research is also needed to elucidate potential biological explanations for the stronger  
663 effects of maternal SQ-LNS observed among female infants, compared to males, and how to  
664 overcome the constraints on response among males. Regardless of the mechanism, the  
665 substantial reduction in risk of newborn stunting among females may have implications with  
666 regard to subsequent height during childhood, adolescence and adulthood (55, 56). Greater  
667 maternal stature in females at the time of childbearing may reduce the risk of SGA and thereby  
668 help prevent the intergenerational transmission of impaired growth.

669 From a programmatic perspective, the effects among vulnerable subgroups demonstrated herein  
670 suggest that targeting provision of SQ-LNS to younger women, those with low BMI, or those in  
671 households with food insecurity may be worth considering. This type of targeting is envisioned  
672 for BEP interventions in general (9), and the 2016 WHO guideline on antenatal care (57) already  
673 recommends prenatal BEP in populations with a high prevalence of undernutrition among  
674 pregnant women. Given that SQ-LNS meets the definition of BEP, our results support the  
675 strategy of targeting food-based supplements to pregnant women who have the greatest potential  
676 to benefit. SQ-LNS provides less energy than most BEP supplements that have been evaluated,  
677 but at present there is no clear dose-response relationship between the quantity of LNS (or BEP  
678 of other types) and birth outcomes (58). Further research is needed to identify the optimal energy  
679 content of LNS for pregnant women. However, it is noteworthy that the effects of SQ-LNS (vs  
680 IFA/SOC) on birth outcomes in this IPD analysis were larger among women with greater food  
681 insecurity, despite the small amount of energy provided. This implies that improving intake of  
682 essential nutrients during pregnancy in high-risk populations is of paramount importance.

683

## 684 **Acknowledgments**

685 We thank all of the co-investigators, collaborators, study teams, participants and local  
686 communities involved in the trials included in these analyses. These trials benefitted from the  
687 contributions of many partner organizations, including: icddr,b (Rang-Din Nutrition Study); the  
688 International Lipid-based Nutrient Supplements Project Steering Committee (iLiNS Project  
689 trials); NICHD-Global Network for Women’s and Children’s Health Research and Institute of  
690 Nutrition in Central America and Panama (INCAP) (Women First trial); and Nutriset (for  
691 development of SQ-LNS).

692

693 The authors’ responsibilities were as follows—KGD: drafted the manuscript with input from  
694 KRW, CDA, CPS and other coauthors; KRW, CDA, KGD, and CPS: wrote the statistical  
695 analysis plan; BFA, PA, LH, NFK, JL, SM: reviewed, contributed to, and approved the statistical  
696 analysis plan; KRW and CDA: compiled the data; CDA: conducted the data analysis; and all  
697 authors: read, contributed to, and approved the final manuscript; KGD is responsible for final  
698 content.

699

700 Supported by Bill & Melinda Gates Foundation grant OPP49817 (to KGD). All authors report no  
701 conflicts of interest.

## REFERENCES

1. Stevens G.A., Beal T., Mbuya M.N.N., Luo H., Neufeld L.M., Global Micronutrient Deficiencies Research G. Micronutrient deficiencies among preschool-aged children and women of reproductive age worldwide: a pooled analysis of individual-level data from population-representative surveys. *Lancet Glob Health* 2022;10:e1590-e9.
2. World Health Organization. Global Anaemia Estimates. 2021. Available at: [https://www.who.int/data/gho/data/themes/topics/anaemia\\_in\\_women\\_and\\_children](https://www.who.int/data/gho/data/themes/topics/anaemia_in_women_and_children). Accessed on: 4 April 2022.
3. United Nations Children's Fund. UNICEF Programming Guidance. Prevention of malnutrition in women before and during pregnancy and while breastfeeding. New York: UNICEF, 2021. Available at: <https://www.unicef.org/media/114561/file/Maternal%20Nutrition%20Programming%20Guidance.pdf>. Accessed on: 18 March 2024.
4. United Nations Children's Fund. UNICEF Data: Monitoring the situation of children and women. Women's Nutrition. 2021. Available at: <https://data.unicef.org/topic/nutrition/womens-nutrition/#resources>. Accessed on: 18 March 2024.
5. Torheim L.E., Ferguson E.L., Penrose K., Arimond M. Women in resource-poor settings are at risk of inadequate intakes of multiple micronutrients. *J Nutr* 2010;140:2051S-8S.
6. Ashorn P., Ashorn U., Muthiani Y., Aboubaker S., Askari S., Bahl R., et al. Small vulnerable newborns-big potential for impact. *Lancet* 2023;401:1692-706.
7. Lawn J.E., Ohuma E.O., Bradley E., Idueta L.S., Hazel E., Okwaraji Y.B., et al. Small babies, big risks: global estimates of prevalence and mortality for vulnerable newborns to accelerate change and improve counting. *Lancet* 2023;401:1707-19.
8. Hunter P.J., Awoyemi T., Ayede A.I., Chico R.M., David A.L., Dewey K.G., et al. Biological and pathological mechanisms leading to the birth of a small vulnerable newborn. *Lancet* 2023;401:1720-32.
9. Hofmeyr G.J., Black R.E., Rogozinska E., Heuer A., Walker N., Ashorn P., et al. Evidence-based antenatal interventions to reduce the incidence of small vulnerable newborns and their associated poor outcomes. *Lancet* 2023;401:1733-44.
10. Ota E., Hori H., Mori R., Tobe-Gai R., Farrar D. Antenatal dietary education and supplementation to increase energy and protein intake. *Cochrane Database of Systematic Reviews* 2015:CD000032.
11. Arimond M., Zeilani M., Jungjohann S., Brown K.H., Ashorn P., Allen L.H., Dewey K.G. Considerations in developing lipid-based nutrient supplements for prevention of undernutrition: Experience from the International Lipid-Based Nutrient Supplements (iLiNS) Project. *Matern Child Nutr* 2015;11 31-61.
12. USAID Advancing Nutrition. Small-Quantity Lipid-Based Nutrient Supplement Program implementation learnings and considerations for scale-up from International Food Relief Partnership partners in Honduras, Niger, and Somalia. Arlington, VA: USAID Advancing Nutrition. 2022. Available at: <https://www.advancingnutrition.org/resources/small-quantity-lipid-based-nutrient-supplement-program-implementation>. Accessed on: 12 April 2023.
13. Das J.K., Hoodbhoy Z., Salam R.A., Bhutta A.Z., Valenzuela-Rubio N.G., Weise Prinzo Z., Bhutta Z.A. Lipid-based nutrient supplements for maternal, birth, and infant developmental outcomes. *Cochrane Database of Systematic Reviews* 2018;8:CD012610.

14. Hunter P.J., Muthiani Y., Nasanen-Gilmore P.K., Koivu A.M., Portfors P., Bastola K., et al. A modular systematic review of antenatal interventions to address undernutrition during pregnancy in the prevention of low birth weight. *Amer J Clin Nutr* 2023;117 Suppl 2:S134-S47.
15. Dewey K.G., Stewart C.P., Wessells K.R., Prado E.L., Arnold C.D. Small-quantity lipid-based nutrient supplements for the prevention of child malnutrition and promotion of healthy development: Overview of individual participant data meta-analysis and programmatic implications. *Amer J Clin Nutr* 2021;114:3S-14S.
16. Wessells R., Dewey K., Stewart C., Arnold C., Prado E. Modifiers of the effect of LNS provided to pregnant women on maternal, birth and infant outcomes: A systematic review and meta-analysis of individual participant data from randomized controlled trials in low- and middle-income countries. PROSPERO CRD42021283391. 2021. Available from: [https://www.crd.york.ac.uk/prospero/display\\_record.php?ID=CRD42021283391](https://www.crd.york.ac.uk/prospero/display_record.php?ID=CRD42021283391) Accessed on: 18 March 2024..
17. Wessells K.R., Dewey K., Arnold C.D., Stewart C., Prado E. Modifiers of the effect of LNS provided to pregnant women on maternal, birth and infant outcomes. *Open Science Framework*. 2021. Available at: <https://osf.io/nj5f9/>. Accessed on: 18 March 2024.
18. World Bank Historical Classification by Income Group. Available at: <http://databank.worldbank.org/data/download/site-content/OGHIST.xls> Accessed on: 22 August 2019.
19. Smith E.R., Shankar A.H., Wu L.S., Aboud S., Adu-Afarwuah S., Ali H., et al. Modifiers of the effect of maternal multiple micronutrient supplementation on stillbirth, birth outcomes, and infant mortality: a meta-analysis of individual patient data from 17 randomised trials in low-income and middle-income countries. *Lancet Glob Health* 2017;5:e1090-e100.
20. WHO. WHO antenatal care recommendations for a positive pregnancy experience. Nutritional interventions update: Multiple micronutrient supplements during pregnancy. Geneva: World Health Organization, 2020.
21. Johnston B.C., Guyatt G.H. Best (but oft-forgotten) practices: intention-to-treat, treatment adherence, and missing participant outcome data in the nutrition literature. *Am J Clin Nutr* 2016;104:1197-201.
22. WHO Multicentre Growth Reference Study Group. WHO Child Growth Standards: Length/height-for-age, weight-for-age, weight-for-length, weight-for-height and body mass index-for-age: Methods and development. Geneva: World Health Organization, 2006.
23. WHO Multicentre Growth Reference Study Group. WHO Child Growth Standards: Head circumference-for-age, arm circumference-for-age, triceps skinfold-for-age and subscapular skinfold-for-age: Methods and development. Geneva: World Health Organization, 2007.
24. Villar J., Cheikh Ismail L., Victora C.G., Ohuma E.O., Bertino E., Altman D.G., et al. International standards for newborn weight, length, and head circumference by gestational age and sex: the Newborn Cross-Sectional Study of the INTERGROWTH-21st Project. *Lancet* 2014;384:857-68.
25. Tukey J. The future of data analysis. *The Annals of Mathematical Statistics* 1962;33:1-67.
26. Higgins J., Green S. *Cochrane Handbook for Systematic Reviews for Interventions*, Version 5.1.0. The Cochrane Collaboration 2011. Available from [www.handbook.cochrane.org](http://www.handbook.cochrane.org).

27. Balshem H., Helfand M., Schunemann H.J., Oxman A.D., Kunz R., Brozek J., et al. GRADE guidelines: 3. Rating the quality of evidence. *J Clin Epidemiol* 2011;64:401-6.
28. Dewey K.G., Wessells K.R., Arnold C.D., Prado E.L., Abbeddou S., Adu-Afarwuah S., et al. Characteristics that modify the effect of small-quantity lipid-based nutrient supplementation on child growth: An individual participant data meta-analysis of randomized controlled trials. *Amer J Clin Nutr* 2021;114 (Suppl 1):15S-42S.
29. Burke D.L., Ensor J., Riley R.D. Meta-analysis using individual participant data: one-stage and two-stage approaches, and why they may differ. *Stat Med* 2017;36:855-75.
30. Higgins J.P., Thompson S.G., Deeks J.J., Altman D.G. Measuring inconsistency in meta-analyses. *BMJ* 2003;327:557-60.
31. Streiner D.L. Best (but oft-forgotten) practices: the multiple problems of multiplicity-whether and how to correct for many statistical tests. *Am J Clin Nutr* 2015;102:721-8.
32. Mridha M.K., Matias S.L., Chaparro C.M., Paul R.R., Hussain S., Vosti S.A., et al. Lipid-based nutrient supplements for pregnant women reduce newborn stunting in a cluster-randomized controlled effectiveness trial in Bangladesh. *Amer J Clin Nutr* 2016;103:236-49.
33. Adu-Afarwuah S., Lartey A., Okronipa H., Ashorn P., Zeilani M., Peerson J.M., et al. Lipid-based nutrient supplement increases the birth size of infants of primiparous women in Ghana. *Amer J Clin Nutr* 2015;101:835-46.
34. Ashorn P., Alho L., Ashorn U., Cheung Y.B., Dewey K.G., Harjunmaa U., et al. The impact of lipid-based nutrient supplement provision to pregnant women on newborn size in rural Malawi: A randomized controlled trial. *Amer J Clin Nutr* 2015;101:387-97.
35. Hambidge K.M., Westcott J.E., Garces A., Figueroa L., Goudar S.S., Dhaded S.M., et al. A multicountry randomized controlled trial of comprehensive maternal nutrition supplementation initiated before conception: The Women First trial. *Amer J Clin Nutr* 2019;109:457-69.
36. Kaestel P., Michaelsen K.F., Aaby P., Friis H. Effects of prenatal multimicronutrient supplements on birth weight and perinatal mortality: a randomised, controlled trial in Guinea-Bissau. *Eur J Clin Nutr* 2005;59:1081-9.
37. The Multiple Micronutrient Supplement Technical Advisory Group (MMS-TAG), The Micronutrient Forum (MNF). Expert consensus on an open-access United Nations International Multiple Micronutrient Antenatal Preparation - multiple micronutrient supplement product specification. *Annals New York Acad Sci* 2020;1470:3-13.
38. Keats E.C., Haider B.A., Tam E., Bhutta Z.A. Multiple-micronutrient supplementation for women during pregnancy. *Cochrane Database Syst Rev* 2019;3:CD004905.
39. Wessells K.R., Arnold C.D., Stewart C.P., Prado E.L., Abbeddou S., Adu-Afarwuah S., et al. Characteristics that modify the effect of small-quantity lipid-based nutrient supplementation on child anemia and micronutrient status: an individual participant data meta-analysis of randomized controlled trials. *Amer J Clin Nutr* 2021;114:68S-94S.
40. Moore S.E. Sex differences in growth and neurocognitive development in infancy and early childhood. *Proc Nutr Soc* 2024:1-8.
41. Wells J.C. Natural selection and sex differences in morbidity and mortality in early life. *J Theor Biol* 2000;202:65-76.
42. Sauder M.W., Lee S.E., Schulze K.J., Christian P., Wu L.S.F., Khattry S.K., et al. Inflammation throughout pregnancy and fetal growth restriction in rural Nepal. *Epidemiol Infect* 2019;147:e258.



43. Desai M., ter Kuile F.O., Nosten F., McGready R., Asamoia K., Brabin B., Newman R.D. Epidemiology and burden of malaria in pregnancy. *Lancet Infect Dis* 2007;7:93-104.
44. Adu-Afarwuah S., Lartey A., Okronipa H., Ashorn P., Zeilani M., Baldiviez L.M., et al. Impact of small-quantity lipid-based nutrient supplement on hemoglobin, iron status and biomarkers of inflammation in pregnant Ghanaian women. *Matern Child Nutr* 2017;13.
45. Jorgensen J.M., Ashorn P., Ashorn U., Baldiviez L.M., Gondwe A., Maleta K., et al. Effects of lipid-based nutrient supplements or multiple micronutrient supplements compared with iron and folic acid supplements during pregnancy on maternal haemoglobin and iron status. *Matern Child Nutr* 2018;14:e12640.
46. Matias S.L., Mridha M.K., Young R.T., Hussain S., Dewey K.G. Daily maternal lipid-based nutrient supplementation with 20 mg iron, compared with iron and folic acid with 60 mg iron, resulted in lower iron status in late pregnancy but not at 6 months postpartum in either the mothers or their infants in Bangladesh. *J Nutr* 2018;148:1615-24.
47. Oaks B.M., Jorgensen J.M., Baldiviez L.M., Adu-Afarwuah S., Maleta K., Okronipa H., et al. Prenatal Iron Deficiency and Replete Iron Status Are Associated with Adverse Birth Outcomes, but Associations Differ in Ghana and Malawi. *J Nutr* 2019;149:513-21.
48. Martinat M., Rossitto M., Di Miceli M., Laye S. Perinatal Dietary Polyunsaturated Fatty Acids in Brain Development, Role in Neurodevelopmental Disorders. *Nutrients* 2021;13.
49. Devakumar D., Fall C.H., Sachdev H.S., Margetts B.M., Osmond C., Wells J.C., et al. Maternal antenatal multiple micronutrient supplementation for long-term health benefits in children: a systematic review and meta-analysis. *BMC Med* 2016;14:90.
50. Mertens A., Benjamin-Chung J., Colford J.M., Jr., Coyle J., van der Laan M.J., Hubbard A.E., et al. Causes and consequences of child growth faltering in low-resource settings. *Nature* 2023;621:568-76.
51. Mahmud I., Guesdon B., Kerac M., Grijalva-Eternod C.S. Mortality risk in infants receiving therapeutic care for malnutrition: A secondary analysis. *Matern Child Nutr* 2024:e13635.
52. McDonald C.M., Olofin I., Flaxman S., Fawzi W.W., Spiegelman D., Caulfield L.E., et al. The effect of multiple anthropometric deficits on child mortality: meta-analysis of individual data in 10 prospective studies from developing countries. *Am J Clin Nutr* 2013;97:896-901.
53. Verney A.M.J., Busch-Hallen J.F., Walters D.D., Rowe S.N., Kurzawa Z.A., Arabi M. Multiple micronutrient supplementation cost-benefit tool for informing maternal nutrition policy and investment decisions. *Matern Child Nutr* 2023;19:e13523.
54. Healthy Mothers Healthy Babies. Multiple Micronutrient Supplementation. Available at: <https://hmhbconsortium.org/mms/>. Accessed on: 18 March 2024.
55. Kumordzie S.M., Adu-Afarwuah S., Arimond M., Young R.R., Adom T., Boatman R., et al. Maternal and infant lipid-based nutritional supplementation increases height of Ghanaian children at 4-6 years only if the mother was not overweight before conception. *J Nutr* 2019;149:847-55.
56. Bentil H.J., Adu-Afarwuah S., Prado E.L., Arnold C.D., Hastings P.D., Guyer A.E., et al. Sustained effects of small-quantity lipid-based nutrient supplements provided during the first 1000 days on child growth at 9-11 y in a randomized controlled trial in Ghana. *Am J Clin Nutr* 2024;119:425-32.
57. WHO. WHO recommendations on antenatal care for a positive pregnancy experience. Geneva, 2016.

58. McDonald C.M., Wessells K.R., Stewart C.P., Dewey K.G., de Pee S., Rana R., et al.  
Antenatal interevent strategies providing food or cash with micronutrients to pregnant and breastfeeding women in low- and middle-income countries: a scoping review. *Matern Child Nutr* 2024, in submission.
59. International Classification of Disease 10th Revision (ICD-10). 2010. Available online at: [http://www.who.int/classifications/icd/ICD10Volume2\\_en\\_2010.pdf?ua=1](http://www.who.int/classifications/icd/ICD10Volume2_en_2010.pdf?ua=1). Accessed on: 14 June 2021.
60. WHO, UNICEF Joint Monitoring Programme. Sanitation. Available at <http://washdata.org/monitoring/sanitation>. Accessed on: 26 August 2019.



**Box 1: Outcome variables<sup>1</sup>**

| <b>Continuous outcomes</b>                                              | <b>Categorical outcomes</b>                                        |
|-------------------------------------------------------------------------|--------------------------------------------------------------------|
| <b>Birth size and duration of gestation</b>                             |                                                                    |
| Birth weight (g), weight-for-age z score (WAZ)                          | Low birth weight (LBW) < 2500 g (59), Birth weight < 2000 g        |
| Weight-for-gestational age z-score (WGAZ)                               | Small-for-gestational age (SGA) < 10 <sup>th</sup> percentile (24) |
|                                                                         | Large-for-gestational age (LGA) > 90 <sup>th</sup> percentile (24) |
| Birth length (cm), length-for-age z score (LAZ)                         | Newborn stunting, LAZ < -2 SD (22)                                 |
| Length-for-gestational age z-score (LGAZ)                               | Low LGAZ (LGAZ < -2 SD) (24)                                       |
| BMI-for-age z-score (BMIZ) <sup>2</sup>                                 | Newborn wasting, BMIZ < -2 SD (22)                                 |
| Birth head circumference (cm), head circumference-for-age z score (HCZ) | Small head circumference, HCZ < -2 SD (23)                         |
| Head circumference-for-gestational age z score (HCGAZ)                  | Low HCGAZ, HCGAZ < -2 SD (2)                                       |
| Mid-upper arm circumference (MUAC, cm)                                  |                                                                    |
| Duration of gestation (wk)                                              | Preterm birth (duration of gestation < 37 wk)                      |
| <b>Anthropometric outcomes at 6 months of age</b>                       |                                                                    |
| Weight-for-age Z score (WAZ)                                            | Underweight, WAZ < -2 SD (22)                                      |
| Length-for-age Z score (LAZ)                                            | Stunting, LAZ < -2 SD (22)                                         |
| Weight-for-length Z score (WLZ)                                         | Wasting, WLZ < -2 SD (22)                                          |
| Head circumference-for-age Z score (HCZ)                                | Small head circumference, HCZ < -2 SD (23)                         |
| MUAC-for-age Z score (MUACZ)                                            | Low MUAC, MUACZ < -2 SD or MUAC < 125 mm (23)                      |
|                                                                         | Acute malnutrition, WLZ < -2 SD or MUAC < 125 mm (22)              |
| <b>Adverse outcomes</b>                                                 |                                                                    |
|                                                                         | Cesarian-section                                                   |
|                                                                         | Miscarriage, embryo or fetal death < 28 weeks (59)                 |
|                                                                         | Stillbirth, fetal death ≥ 28 weeks gestation (59)                  |
|                                                                         | Early neonatal mortality ≤ 7 days (59)                             |
|                                                                         | Neonatal mortality ≤ 28 days (59)                                  |
|                                                                         | Infant mortality < 6 months                                        |

<sup>1</sup> BMIZ, BMI-for-age z-score; HCGAZ, head circumference-for-gestational age z-score; HCZ, head circumference-for-age z-score; LAZ, length-for-age z-score; LBW, low birth weight; LGA, large-for-gestational age; LGAZ, length-for-gestational age z-score; MUAC, mid-upper arm circumference; MUACZ, mid-upper arm circumference-for-age z-score; SGA, small-for-gestational age; WAZ, weight-for-age z-score; WGAZ, weight-for-gestational age z-score; WLZ, weight-for-length z-score

<sup>2</sup> BMIZ is used as a proxy for weight-for-length z-score because the latter is not calculated for children with lengths < 45 cm (22).

## Box 2: Potential effect modifiers<sup>1</sup>

| Individual-level child, maternal and household effect modifiers                                                                                                                                                                                                                                                                                                                                                                                                                                                                                                                                                                                                                                                                                                                                                                                                                                        |
|--------------------------------------------------------------------------------------------------------------------------------------------------------------------------------------------------------------------------------------------------------------------------------------------------------------------------------------------------------------------------------------------------------------------------------------------------------------------------------------------------------------------------------------------------------------------------------------------------------------------------------------------------------------------------------------------------------------------------------------------------------------------------------------------------------------------------------------------------------------------------------------------------------|
| <b>Child</b> <ul style="list-style-type: none"><li>• Sex (female vs. male)</li><li>• Birth order (first born vs. later born)</li></ul>                                                                                                                                                                                                                                                                                                                                                                                                                                                                                                                                                                                                                                                                                                                                                                 |
| <b>Maternal</b> <ul style="list-style-type: none"><li>• Maternal height (&lt; 150.1 cm vs. <math>\geq</math> 150.1 cm)<sup>2</sup></li><li>• Maternal BMI (&lt; 20 kg/m<sup>2</sup> vs. <math>\geq</math> 20 kg/m<sup>2</sup>)<sup>3</sup></li><li>• Maternal age (&lt; 25 y vs. <math>\geq</math> 25 y)</li><li>• Maternal education (no formal or incomplete primary vs. complete primary or greater)</li><li>• Baseline anemia status (Hb <math>\geq</math> 110 g/L vs. &lt; 110 g/L)</li><li>• Baseline inflammation status (CRP <math>\leq</math> 5 mg/L and AGP <math>\leq</math> 1 g/L vs. not)</li><li>• Baseline malaria status (positive rapid test for malaria vs. negative test)</li><li>• Gestational age at start of supplementation (&lt; 14 wk vs. <math>\geq</math> 14 wk)</li><li>• Compliance with supplementation (<math>\geq</math> 4 d/wk vs. &lt; 4 d/wk)<sup>4</sup></li></ul> |
| <b>Household</b> <ul style="list-style-type: none"><li>• Household socio-economic status (&lt; study median vs. <math>\geq</math> study median)<sup>5</sup></li><li>• Household food security (moderate to severe food insecurity vs. mild to secure)</li><li>• Sanitation (unimproved vs. improved)<sup>6</sup></li></ul>                                                                                                                                                                                                                                                                                                                                                                                                                                                                                                                                                                             |

<sup>1</sup> Comparisons follow the format nonreference vs. reference category. AGP,  $\alpha$ -1-acid glycoprotein; CRP, C-reactive protein; Hb, hemoglobin. Some potential effect modifiers that were listed in the statistical analysis plan were not included: maternal marital status was dropped because of insufficient variation; maternal depression was dropped because it was evaluated only at 6 mo postpartum; source water quality was not included because there was little variation in two of the eligible trials; season at time of conception was not included because the seasonal factors that may influence pregnancy outcomes (rainy/dry, harvest/hungry, heat stress) do not always coincide and a 9-month pregnancy involves exposure to several seasons at different stages of pregnancy.

<sup>2</sup> Cutoff is -2 SD for height at 19 years of age: [https://www.who.int/growthref/hfa\\_girls\\_5\\_19years\\_z.pdf?ua=1](https://www.who.int/growthref/hfa_girls_5_19years_z.pdf?ua=1)

<sup>3</sup> When a pre-pregnancy weight measurement was not available, we estimated weight back to the 9th week of gestation using a restricted cubic spline model regressing baseline weight on gestational age at enrollment with 4 knots based on quintiles in the study's full dataset.

<sup>4</sup> Cutoff of > 4 d/wk chosen to accommodate the categorical variable for compliance used in the Bangladesh trial (32), which had only these choices: “did not take at all,” “used to take sometimes (1–3 d/wk),” “used to take almost every day (4–6 d/wk),” “used to take regularly every day,” and “other.”

<sup>5</sup> Based on a study-defined, study-specific assets index

<sup>6</sup> Improved sanitation includes flush/pour flush to piped sewer system, septic tanks or pit latrines; ventilated improved pit latrines, composting toilets or pit latrines with slabs (60); see Supplemental Table 2, based on baseline data

**Table 1. Characteristics of trials included in the individual participant data analysis<sup>1</sup>**

| Country, years of study, study name, N, trial design, (author date)                                                      | Maternal Intervention Groups                                                                          | Comparisons        |                | Maternal Characteristics at enrollment |                  |                                                 |                 |                                          |
|--------------------------------------------------------------------------------------------------------------------------|-------------------------------------------------------------------------------------------------------|--------------------|----------------|----------------------------------------|------------------|-------------------------------------------------|-----------------|------------------------------------------|
|                                                                                                                          |                                                                                                       | SQ-LNS vs. control | SQ-LNS vs. MMS | Gestational age (wk)                   | Maternal age (y) | Maternal pre-pregnancy BMI (kg/m <sup>2</sup> ) | Nulliparous (%) | Moderately or severely food insecure (%) |
| Bangladesh, 2011-2015, RDNS, N=4011, cluster RCT; longitudinal follow-up (Mridha 2016) (32)                              | SQ-LNS from < 20 weeks gestation to 6 mo post-partum                                                  | ✓                  |                | 13.1 (3.8)                             | 22.0 (5.0)       | 20.1 (2.7)                                      | 39.7            | 38.2                                     |
|                                                                                                                          | IFA from < 20 weeks gestation to 3 mo post-partum <sup>2</sup>                                        | ✓                  |                |                                        |                  |                                                 |                 |                                          |
| Ghana, 2009-2014, iLiNS-DYAD-G, N=1320, RCT; longitudinal follow-up (Adu-Afarwuah 2015) (33)                             | SQ-LNS from < 20 weeks gestation to 6 mo post-partum                                                  | ✓                  | ✓              | 16.2 (3.3)                             | 26.5 (5.3)       | 23.9 (4.3)                                      | 36.8            | 29.7                                     |
|                                                                                                                          | IFA from < 20 weeks gestation to delivery, low-dose Ca from delivery to 6 mo post-partum              | ✓                  |                |                                        |                  |                                                 |                 |                                          |
|                                                                                                                          | MMS from < 20 weeks gestation to 6 mo post-partum                                                     |                    | ✓              |                                        |                  |                                                 |                 |                                          |
| Malawi, 2011-2014, iLiNS-DYAD-M, N= 1391 <sup>3</sup> , RCT, longitudinal follow-up (Ashorn 2015) (34)                   | SQ-LNS from < 20 weeks gestation to 6 mo post-partum <sup>4</sup>                                     | ✓                  | ✓              | 16.8 (2.1)                             | 25.1 (6.2)       | 20.5 (2.7)                                      | 20.6            | 66.2                                     |
|                                                                                                                          | IFA from < 20 weeks gestation to delivery, low-dose Ca from delivery to 6 mo post-partum <sup>4</sup> | ✓                  |                |                                        |                  |                                                 |                 |                                          |
|                                                                                                                          | MMS from < 20 weeks gestation to 6 mo post-partum <sup>4</sup>                                        |                    | ✓              |                                        |                  |                                                 |                 |                                          |
| Guatemala, 2013 - 2017 Women First <sup>5</sup> , N = 1808 <sup>6</sup> RCT, longitudinal follow-up (Hambidge 2019) (35) | SQ-LNS from ≥ 3 months pre-conception to delivery                                                     | (✓) <sup>7</sup>   |                | 11.9 (2.0)                             | 24.4 (4.3)       | 25.4 (4.1)                                      | 6.3             | -                                        |
|                                                                                                                          | SQ-LNS from start of 2 <sup>nd</sup> trimester (12-14 weeks) to delivery                              | ✓                  |                |                                        |                  |                                                 |                 |                                          |
|                                                                                                                          | standard of care (SOC)                                                                                | ✓                  |                |                                        |                  |                                                 |                 |                                          |

<sup>1</sup>IFA, iron and folic acid supplements; LNS, lipid-based nutrient supplements; MMS, multiple micronutrient supplements; SQ-LNS, small-quantity lipid-based nutrient supplement; RCT, randomized controlled trial

<sup>2</sup>In 3 study arms of the RDNS trial, women received IFA during pregnancy and for 3 months post-partum (these study arms differed in that index children received one of 3 different child supplements from 6-24 months); for the purpose of these analyses, these study arms were combined and compared with the maternal SQ-LNS arm.

<sup>3</sup>Total number enrolled in Malawi was 1391. 869 women were assigned to the complete intervention and 18-month follow-up. 522 women were assigned to pregnancy supplementation only, with simplified follow-up.

<sup>4</sup>Interventions noted in the table were provided to women assigned to the complete intervention cohort. Women in the simplified follow-up received supplements (SQ-LNS, IFA or MMS) from  $\leq 20$  weeks of gestation to delivery only.

<sup>5</sup>The Women First trial provided a protein-energy supplement (in addition to SQ-LNS) to enrolled women who were either underweight or who had inadequate gestational weight gain. In 3 of the 4 study sites (Democratic Republic of the Congo, India, and Pakistan), >90% of enrolled women received this supplement in addition to SQ-LNS. Therefore, only the Guatemala site is included in these analyses (where < 10% of enrolled women received a protein-energy supplement in addition to SQ-LNS).

<sup>6</sup>Total number enrolled (prior to conception) was 1808 in Guatemala; the number of live births for data analysis was 651 (193 in the preconception arm, 229 in the pregnancy arm, 229 in the SOC arm).

<sup>7</sup>The study arm that provided pre-conception SQ-LNS was excluded from the primary comparisons; results including this arm are presented in supplemental materials.

**Table 2. Main effects of maternal SQ-LNS vs IFA/SOC on birth outcomes<sup>1</sup>**

| <b>Birth outcome</b>                                                | <b>Number of participants (trials)</b> | <b>SQ-LNS events per 1000</b> | <b>IFA/SOC events per 1000</b> | <b>MD or RR plus difference in events per 1000 (95% CI)<sup>2</sup></b> | <b>P value<sup>3</sup></b> | <b>Heterogeneity <i>I</i><sup>2</sup></b> | <b>Quality of the evidence (GRADE)</b> |
|---------------------------------------------------------------------|----------------------------------------|-------------------------------|--------------------------------|-------------------------------------------------------------------------|----------------------------|-------------------------------------------|----------------------------------------|
| Birth weight (g)                                                    | 5273 (4)                               | -                             | -                              | 48.7 (26.1, 71.2)                                                       | <0.001                     | 0.00                                      | Moderate                               |
| Weight-for-age z score (WAZ)                                        | 5273 (4)                               | -                             | -                              | 0.12 (0.06, 0.17)                                                       | <0.001                     | 0.00                                      | Moderate                               |
| Weight-for-gestational age z-score (WGAZ) <sup>4</sup>              | 1717 (3)                               | -                             | -                              | 0.13 (0.05, 0.21)                                                       | 0.001                      | 0.31                                      | Moderate                               |
| Low birth weight (LBW)                                              | 5273 (4)                               | 168                           | 198                            | 0.89 (0.80, 0.99)<br>-28.6 (-51.3, -5.9)                                | 0.033<br>0.013             | 0.00<br>0.00                              | Moderate                               |
| Birth weight < 2 kg                                                 | 5273 (4)                               | 25                            | 35                             | 0.78 (0.60, 1.01)<br>-9.1 (-18.5, 0.2)                                  | 0.062<br>0.054             | 0.00<br>0.00                              | Moderate                               |
| Small-for-gestational age (SGA)                                     | 5181 (4)                               | 303                           | 335                            | 0.96 (0.92, 1.01)<br>-23.0 (-46.7, 0.7)                                 | 0.133<br>0.057             | 0.00<br>0.00                              | Moderate                               |
| Large-for-gestational age (LGA)                                     | 4834 (3)                               | 20                            | 23                             | 1.00 (0.61, 1.65)<br>1.1 (-3.1, 5.3)                                    | 0.984<br>0.611             | 0.00<br>0.00                              | Moderate                               |
| Birth length (cm)                                                   | 5014 (4)                               | -                             | -                              | 0.20 (0.09, 0.31)                                                       | <0.001                     | 0.00                                      | Moderate                               |
| Length-for-age z score (LAZ)                                        | 5014 (4)                               | -                             | -                              | 0.11 (0.06, 0.17)                                                       | <0.001                     | 0.00                                      | Moderate                               |
| Length-for-gestational age z-score (LGAZ) <sup>4</sup>              | 1460 (3)                               | -                             | -                              | 0.13 (0.05, 0.21)                                                       | 0.002                      | 0.00                                      | Moderate                               |
| Newborn stunting                                                    | 5014 (4)                               | 138                           | 164                            | 0.83 (0.74, 0.93)<br>-32.2 (-51.5, -12.9)                               | 0.001<br>0.001             | 0.00<br>0.00                              | Moderate                               |
| Low LGAZ                                                            | 4922 (4)                               | 118                           | 127                            | 0.90 (0.80, 1.01)<br>-12.0 (-29.6, 5.6)                                 | 0.082<br>0.182             | 0.00<br>0.00                              | Moderate                               |
| BMI-for-age z-score (BMIZ)                                          | 5002 (4)                               | -                             | -                              | 0.10 (0.04, 0.16)                                                       | 0.002                      | 0.00                                      | Moderate                               |
| Low BMIZ                                                            | 5002 (4)                               | 123                           | 145                            | 0.89 (0.81, 0.98)<br>-23.6 (-42.7, -4.5)                                | 0.022<br>0.015             | 0.26<br>0.20                              | Moderate                               |
| Head circumference (cm)                                             | 5016 (4)                               | -                             | -                              | 0.11 (0.04, 0.18)                                                       | 0.002                      | 0.00                                      | Moderate                               |
| Head circumference-for-age z-score (HCZ)                            | 5016 (4)                               | -                             | -                              | 0.10 (0.04, 0.16)                                                       | 0.001                      | 0.00                                      | Moderate                               |
| Head circumference-for-gestational age z-score (HCGAZ) <sup>4</sup> | 1461 (3)                               | -                             | -                              | 0.11 (0.02, 0.20)                                                       | 0.019                      | 0.00                                      | Moderate                               |
| Low HCZ                                                             | 5016 (4)                               | 100                           | 118                            | 0.85 (0.75, 0.96)<br>-22.1 (-40.5, -3.7)                                | 0.009<br>0.019             | 0.00<br>0.00                              | Moderate                               |

|                                         |          |     |     |                                         |                |              |          |
|-----------------------------------------|----------|-----|-----|-----------------------------------------|----------------|--------------|----------|
| Low HCGAZ                               | 4924 (4) | 54  | 64  | 0.88 (0.76, 1.01)<br>-6.4 (-18.4, 5.5)  | 0.072<br>0.291 | 0.00<br>0.32 | Moderate |
| Mid-upper arm circumference (MUAC) (cm) | 4581 (3) | -   | -   | 0.08 (0.02, 0.14)                       | 0.009          | 0.00         | Moderate |
| Duration of gestation (wk)              | 5348 (4) | -   | -   | 0.12 (0.01, 0.24)                       | 0.040          | 0.00         | Moderate |
| Preterm birth                           | 5348 (4) | 106 | 111 | 0.94 (0.80, 1.10)<br>-7.1 (-25.8, 11.5) | 0.445<br>0.454 | 0.00<br>0.00 | Moderate |

<sup>1</sup>BMIZ, BMI-for-age z-score; GRADE, Grading of Recommendations Assessment, Development and Evaluation; HCGAZ, head circumference-for-gestational age z-score; HCZ, head circumference-for-age z-score; IFA, iron and folic acid supplement; LAZ, length-for-age z-score; LBW, low birth weight; LGA, large-for-gestational age; LGAZ, length-for-gestational age z-score; MD, mean difference; MUAC, mid-upper arm circumference; RR, relative risk; SGA, small-for-gestational age; SOC, standard of care; SQ-LNS, small-quantity lipid-based nutrient supplement; WAZ, weight-for-age z-score; WGAZ, weight-for-gestational age z-score

<sup>2</sup>For continuous outcomes, values are MDs: LNS – IFA/SOC (95% CIs). For binary outcomes, values are RRs: LNS compared with IFA/SOC (95% CIs). Difference in events per 1000 was calculated using the prevalence difference (95% CI) and multiplying by 1000.

<sup>3</sup>The P value column corresponds to the pooled main effect 2-sided superiority testing of the intervention effect estimate and 95% CI presented in the preceding column.  $I^2$  describes the percentage of variability in effect estimates that may be due to heterogeneity rather than chance. Roughly, 0.3 – 0.6 may be considered moderate heterogeneity.

<sup>4</sup> For continuous outcomes based on INTERGROWTH-21st standards, we excluded participants without ultrasound data for calculation of gestational age. For the corresponding binary outcomes (SGA, LGA, Low LGAZ, Low HCGAZ), we retained participants without ultrasound dating but conducted a sensitivity analysis in which they were excluded.

**Table 3. Main effects of maternal SQ-LNS vs IFA/SOC on infant anthropometric outcomes at 6 mo of age<sup>1</sup>**

| Infant anthropometric outcomes at 6 mo            | Number of participants (trials) | SQ-LNS events per 1000 | IFA/SOC events per 1000 | MD or PR plus difference in events per 1000 (95% CI) <sup>2</sup> | P value <sup>3</sup> | Heterogeneity <i>I</i> <sup>2</sup> | Quality of the evidence (GRADE) |
|---------------------------------------------------|---------------------------------|------------------------|-------------------------|-------------------------------------------------------------------|----------------------|-------------------------------------|---------------------------------|
| Weight-for-age z-score (WAZ)                      | 5029 (4)                        | -                      | -                       | 0.05 (-0.02, 0.13)                                                | 0.173                | 0.00                                | Moderate                        |
| Underweight                                       | 5029 (4)                        | 114                    | 132                     | 0.85 (0.73, 0.99)<br>-22.1 (-41.8, -2.5)                          | 0.041<br>0.027       | 0.41<br>0.37                        | Moderate                        |
| Length-for-age z-score (LAZ)                      | 5032 (4)                        | -                      | -                       | 0.06 (-0.01, 0.13)                                                | 0.080                | 0.02                                | Moderate                        |
| Stunted                                           | 5032 (4)                        | 198                    | 219                     | 0.90 (0.80, 1.02)<br>-17.4 (-43.3, 8.5)                           | 0.102<br>0.187       | 0.00<br>0.00                        | Moderate                        |
| Weight-for-length z-score (WLZ)                   | 5028 (4)                        | -                      | -                       | 0.00 (-0.07, 0.07)                                                | 0.969                | 0.00                                | Moderate                        |
| Wasted                                            | 5028 (4)                        | 24                     | 32                      | 0.91 (0.66, 1.25)<br>-6.3 (-15.8, 3.1)                            | 0.558<br>0.191       | 0.39<br>0.36                        | Moderate                        |
| Head circumference-for-age z-score (HCZ)          | 5028 (4)                        | -                      | -                       | 0.01 (-0.05, 0.07)                                                | 0.679                | 0.00                                | Moderate                        |
| Low HCZ                                           | 5028 (4)                        | 110                    | 125                     | 0.90 (0.80, 1.02)<br>-13.2 (-31.9, 5.4)                           | 0.098<br>0.164       | 0.00<br>0.00                        | Moderate                        |
| MUAC-for-age z-score (MUACZ)                      | 4600 (3)                        | -                      | -                       | 0.00 (-0.07, 0.08)                                                | 0.949                | 0.00                                | Moderate                        |
| Low MUAC [MUACZ < -2 SD or MUAC < 125 mm]         | 4600 (3)                        | 68                     | 64                      | 1.00 (0.78, 1.29)<br>-0.1 (-17.9, 17.7)                           | 0.970<br>0.993       | 0.00<br>0.00                        | Moderate                        |
| Acute malnutrition [WLZ < -2 SD or MUAC < 125 mm] | 4595 (3)                        | 80                     | 82                      | 1.00 (0.79, 1.25)<br>-0.7 (-19.4, 17.9)                           | 0.970<br>0.938       | 0.00<br>0.00                        | Moderate                        |

<sup>1</sup>GRADE, Grading of Recommendations Assessment, Development and Evaluation; HCZ, head circumference-for-age z-score; IFA, iron and folic acid supplement; LAZ, length-for-age z-score; MD, mean difference; MUAC, mid-upper arm circumference; MUACZ, mid-upper arm circumference-for-age z-score; PR, prevalence ratio; SOC, standard of care; SQ-LNS, small-quantity lipid-based nutrient supplement; WAZ, weight-for-age z-score; WLZ, weight-for-length z-score<sup>2</sup>For continuous outcomes, values are MDs: LNS – IFA/SOC (95% CIs). For binary outcomes, values are PRs: LNS compared with IFA/SOC (95% CIs). Difference in events per 1000 was calculated using the prevalence difference (95% CI) and multiplying by 1000.

<sup>3</sup>The P value column corresponds to the pooled main effect 2-sided superiority testing of the intervention effect estimate and 95% CI presented in the preceding column. *I*<sup>2</sup> describes the percentage of variability in effect estimates that may be due to heterogeneity rather than chance. Roughly, 0.3 – 0.6 may be considered moderate heterogeneity.

**Table 4. Main effects of maternal SQ-LNS vs IFA/SOC on adverse outcomes<sup>1</sup>**

| Adverse outcomes                                      | Number of participants (trials) | SQ-LNS events per 1000 | IFA/SOC events per 1000 | RR and difference in events per 1000 (95% CI) <sup>2</sup> | P value <sup>3</sup> | Heterogeneity <i>I</i> <sup>2</sup> | Quality of the evidence (GRADE) |
|-------------------------------------------------------|---------------------------------|------------------------|-------------------------|------------------------------------------------------------|----------------------|-------------------------------------|---------------------------------|
| Cesarian-Section                                      | 5693 (4)                        | 167                    | 156                     | 1.04 (0.90, 1.19)<br>18.6 (-3.6, 40.9)                     | 0.595<br>0.101       | 0.42<br>0.01                        | Moderate                        |
| Miscarriage                                           | 6102 (4)                        | 49                     | 59                      | 0.87 (0.70, 1.08)<br>0.7 (-7.1, 8.6)                       | 0.213<br>0.852       | 0.00<br>0.27                        | Moderate                        |
| Stillbirth                                            | 6102 (4)                        | 24                     | 18                      | 1.31 (0.90, 1.91)<br>7.1 (-1.7, 15.9)                      | 0.153<br>0.116       | 0.49<br>0.53                        | Moderate                        |
| Miscarriage or stillbirth                             | 6102 (4)                        | 75                     | 77                      | 0.98 (0.81, 1.19)<br>1.4 (-12.3, 15.1)                     | 0.870<br>0.844       | 0.39<br>0.40                        | Moderate                        |
| Early neonatal mortality                              | 5506 (4)                        | 14                     | 20                      | 0.74 (0.46, 1.19)<br>-4.8 (-13.2, 3.7)                     | 0.208<br>0.272       | 0.04<br>0.22                        | Moderate                        |
| Miscarriage or stillbirth or early neonatal mortality | 6102 (4)                        | 89                     | 97                      | 0.93 (0.77, 1.12)<br>-6.6 (-23.4, 10.3)                    | 0.452<br>0.444       | 0.00<br>0.00                        | Moderate                        |
| Neonatal mortality                                    | 5528 (4)                        | 21                     | 25                      | 0.83 (0.56, 1.24)<br>-2.9 (-12.3, 6.6)                     | 0.360<br>0.551       | 0.00<br>0.10                        | Moderate                        |
| Mortality 0-6 mo                                      | 5566 (4)                        | 30                     | 32                      | 0.95 (0.69, 1.30)<br>-0.6 (-11.0, 9.8)                     | 0.739<br>0.913       | 0.00<br>0.00                        | Moderate                        |

<sup>1</sup>GRADE, Grading of Recommendations Assessment, Development and Evaluation; IFA, iron and folic acid supplement; RR, relative risk; SOC, standard of care; SQ-LNS, small-quantity lipid-based nutrient supplement

<sup>2</sup>Values are RRs: LNS compared with IFA/SOC (95% CIs). Difference in events per 1000 was calculated using the prevalence difference (95% CI) and multiplying by 1000.

<sup>3</sup>The P value column corresponds to the pooled main effect 2-sided superiority testing of the intervention effect estimate and 95% CI presented in the preceding column. *I*<sup>2</sup> describes the percentage of variability in effect estimates that may be due to heterogeneity rather than chance. Roughly, 0.3 – 0.6 may be considered moderate heterogeneity.



**Table 5. Main effects of maternal SQ-LNS vs MMS on birth outcomes<sup>1</sup>**

| <b>Birth outcome</b>                                   | <b>Number of participants (trials)</b> | <b>SQ-LNS events per 1000</b> | <b>MMS events per 1000</b> | <b>MD or RR plus difference in events per 1000 (95% CI)<sup>2</sup></b> | <b>P value<sup>3</sup></b> | <b>Heterogeneity <i>I</i><sup>2</sup></b> | <b>Quality of the evidence (GRADE)</b> |
|--------------------------------------------------------|----------------------------------------|-------------------------------|----------------------------|-------------------------------------------------------------------------|----------------------------|-------------------------------------------|----------------------------------------|
| Birth weight (g)                                       | 1391 (2)                               | -                             | -                          | 27.8 (-19.1, 74.6)                                                      | 0.245                      | 0.00                                      | Low                                    |
| Weight-for-age z score (WAZ)                           | 1391 (2)                               | -                             | -                          | 0.06 (-0.05, 0.17)                                                      | 0.263                      | 0.00                                      | Low                                    |
| Weight-for-gestational age z-score (WGAZ)              | 1377 (2)                               | -                             | -                          | 0.06 (-0.05, 0.16)                                                      | 0.294                      | 0.00                                      | Low                                    |
| Low birth weight (LBW)                                 | 1391 (2)                               | 105                           | 119                        | 0.88 (0.66, 1.18)<br>-14.2 (-47.3, 18.8)                                | 0.397<br>0.399             | 0.00<br>0.00                              | Low                                    |
| Birth weight < 2 kg                                    | 1391 (2)                               | 19                            | 19                         | 1.07 (0.52, 2.23)<br>-1.1 (-15.1, 12.9)                                 | 0.850<br>0.877             | 0.00<br>0.00                              | Low                                    |
| Small-for-gestational age (SGA)                        | 1391 (2)                               | 214                           | 224                        | 0.96 (0.79, 1.17)<br>-9.3 (-52.7, 34.2)                                 | 0.717<br>0.677             | 0.00<br>0.00                              | Low                                    |
| Large-for-gestational age (LGA)                        | 1391 (2)                               | 32                            | 28                         | 1.16 (0.64, 2.10)<br>5.2 (-12.6, 23.1)                                  | 0.622<br>0.564             | 0.00<br>0.00                              | Low                                    |
| Birth length (cm)                                      | 1137 (2)                               | -                             | -                          | 0.16 (-0.09, 0.40)                                                      | 0.209                      | 0.00                                      | Low                                    |
| Length-for-age z score (LAZ)                           | 1137 (2)                               | -                             | -                          | 0.07 (-0.05, 0.20)                                                      | 0.247                      | 0.00                                      | Low                                    |
| Length-for-gestational age z-score (LGAZ)              | 1123 (2)                               | -                             | -                          | 0.08 (-0.04, 0.20)                                                      | 0.214                      | 0.00                                      | Low                                    |
| Newborn stunting                                       | 1137 (2)                               | 118                           | 110                        | 1.06 (0.77, 1.47)<br>5.5 (-31.3, 42.3)                                  | 0.710<br>0.770             | 0.00<br>0.00                              | Low                                    |
| Low LGAZ                                               | 1137 (2)                               | 109                           | 88                         | 1.22 (0.85, 1.74)<br>11.8 (-19.6, 43.2)                                 | 0.276<br>0.463             | 0.00<br>0.01                              | Low                                    |
| BMI-for-age z-score (BMIZ)                             | 1121 (2)                               | -                             | -                          | 0.01 (-0.12, 0.14)                                                      | 0.830                      | 0.00                                      | Low                                    |
| Low BMIZ                                               | 1121 (2)                               | 67                            | 68                         | 0.99 (0.64, 1.53)<br>-1.2 (-30.8, 28.5)                                 | 0.964<br>0.939             | 0.30<br>0.30                              | Low                                    |
| Head circumference (cm)                                | 1138 (2)                               | -                             | -                          | 0.14 (-0.02, 0.31)                                                      | 0.088                      | 0.08                                      | Low                                    |
| Head circumference-for-age z-score (HCZ)               | 1138 (2)                               | -                             | -                          | 0.11 (-0.02, 0.24)                                                      | 0.109                      | 0.00                                      | Low                                    |
| Head circumference-for-gestational age z-score (HCGAZ) | 1124 (2)                               | -                             | -                          | 0.11 (-0.01, 0.23)                                                      | 0.066                      | 0.00                                      | Low                                    |
| Low HCZ                                                | 1138 (2)                               | 56                            | 43                         | 1.27 (0.77, 2.10)<br>12.3 (-13.0, 37.6)                                 | 0.352<br>0.341             | 0.00<br>0.00                              | Low                                    |
| Low HCGAZ                                              | 1138 (2)                               | 16                            | 17                         | 0.85 (0.35, 2.05)<br>-1.6 (-16.6, 13.4)                                 | 0.711<br>0.831             | 0.00<br>0.00                              | Low                                    |
| Mid-upper arm circumference (MUAC) (cm)                | 1142 (2)                               | -                             | -                          | 0.08 (-0.02, 0.18)                                                      | 0.127                      | 0.00                                      | Low                                    |
| Duration of gestation (wk)                             | 1539 (2)                               | -                             | -                          | -0.04 (-0.27, 0.20)                                                     | 0.771                      | 0.00                                      | Low                                    |

|               |          |    |    |                                         |                |              |     |
|---------------|----------|----|----|-----------------------------------------|----------------|--------------|-----|
| Preterm birth | 1539 (2) | 99 | 79 | 1.21 (0.88, 1.66)<br>18.4 (-10.2, 47.0) | 0.244<br>0.206 | 0.00<br>0.00 | Low |
|---------------|----------|----|----|-----------------------------------------|----------------|--------------|-----|

<sup>1</sup>BMIZ, BMI-for-age z-score; GRADE, Grading of Recommendations Assessment, Development and Evaluation; HCGAZ, head circumference-for-gestational age z-score; HCZ, head circumference-for-age z-score; LAZ, length-for-age z-score; LBW, low birth weight; LGA, large-for-gestational age; LGAZ, length-for-gestational age z-score; MD, mean difference; MMS, multiple micronutrient supplements; MUAC, mid-upper arm circumference; RR, relative risk; SGA, small-for-gestational age; SQ-LNS, small-quantity lipid-based nutrient supplement; WAZ, weight-for-age z-score; WGAZ, weight-for-gestational age z-score

<sup>2</sup>For continuous outcomes, values are MDs: LNS – MMS (95% CIs). For binary outcomes, values are RRs: LNS compared with MMS (95% CIs). Difference in events per 1000 was calculated using the prevalence difference (95% CI) and multiplying by 1000.

<sup>3</sup>The P value column corresponds to the pooled main effect 2-sided superiority testing of the intervention effect estimate and 95% CI presented in the preceding column.  $I^2$  describes the percentage of variability in effect estimates that may be due to heterogeneity rather than chance. Roughly, 0.3 – 0.6 may be considered moderate heterogeneity.

**Table 6. Main effects of maternal SQ-LNS vs MMS on infant anthropometric outcomes at 6 mo of age<sup>1</sup>**

| Infant anthropometric outcomes at 6 mo            | Number of participants (trials) | SQ-LNS events per 1000 | MMS events per 1000 | MD or PR plus difference in events per 1000 (95% CI) <sup>2</sup> | P value <sup>3</sup> | Heterogeneity <i>I</i> <sup>2</sup> | Quality of the evidence (GRADE) |
|---------------------------------------------------|---------------------------------|------------------------|---------------------|-------------------------------------------------------------------|----------------------|-------------------------------------|---------------------------------|
| Weight-for-age z-score (WAZ)                      | 1292 (2)                        | -                      | -                   | -0.01 (-0.14, 0.11)                                               | 0.827                | 0.00                                | Low                             |
| Underweight                                       | 1292 (2)                        | 85                     | 75                  | 1.13 (0.78, 1.64)<br>9.5 (-20.2, 39.2)                            | 0.510<br>0.531       | 0.00<br>0.00                        | Low                             |
| Length-for-age z-score (LAZ)                      | 1289 (2)                        | -                      | -                   | 0.02 (-0.10, 0.13)                                                | 0.792                | 0.00                                | Low                             |
| Stunted                                           | 1289 (2)                        | 166                    | 155                 | 1.05 (0.83, 1.34)<br>13.7 (-25.0, 52.5)                           | 0.673<br>0.487       | 0.00<br>0.00                        | Low                             |
| Weight-for-length z-score (WLZ)                   | 1288 (2)                        | -                      | -                   | -0.04 (-0.16, 0.09)                                               | 0.551                | 0.00                                | Low                             |
| Wasted                                            | 1288 (2)                        | 24                     | 23                  | 0.97 (0.48, 1.97)<br>0.2 (-16.4, 16.9)                            | 0.943<br>0.977       | 0.00<br>0.00                        | Low                             |
| Head circumference-for-age z-score (HCZ)          | 1293 (2)                        | -                      | -                   | -0.03 (-0.13, 0.08)                                               | 0.636                | 0.00                                | Low                             |
| Low HCZ                                           | 1293 (2)                        | 63                     | 81                  | 0.77 (0.52, 1.15)<br>-18.0 (-46.2, 10.2)                          | 0.203<br>0.211       | 0.00<br>0.00                        | Low                             |
| MUAC-for-age z-score (MUACZ)                      | 1293 (2)                        | -                      | -                   | -0.02 (-0.14, 0.10)                                               | 0.727                | 0.00                                | Low                             |
| Low MUACZ [MUACZ < -2 SD or MUAC < 125 mm]        | 1293 (2)                        | 66                     | 74                  | 0.92 (0.62, 1.36)<br>-6.8 (-34.6, 21.1)                           | 0.672<br>0.633       | 0.00<br>0.00                        | Low                             |
| Acute malnutrition [WLZ < -2 SD or MUAC < 125 mm] | 1288 (2)                        | 75                     | 77                  | 0.98 (0.67, 1.43)<br>-1.9 (-31.0, 27.2)                           | 0.918<br>0.899       | 0.00<br>0.00                        | Low                             |

<sup>1</sup>GRADE, Grading of Recommendations Assessment, Development and Evaluation; HCZ, head circumference-for-age z-score; LAZ, length-for-age z-score; MD, mean difference; MUAC, mid-upper arm circumference; MMS, multiple micronutrient supplements; MUACZ, mid-upper arm circumference-for-age z-score; PR, prevalence ratio; SQ-LNS, small-quantity lipid-based nutrient supplement; WAZ, weight-for-age z-score; WLZ, weight-for-length z-score

<sup>2</sup>For continuous outcomes, values are MDs: LNS – MMS (95% CIs). For binary outcomes, values are PRs: LNS compared with MMS (95% CIs). Difference in events per 1000 was calculated using the prevalence difference (95% CI) and multiplying by 1000.

<sup>3</sup>The P value column corresponds to the pooled main effect 2-sided superiority testing of the intervention effect estimate and 95% CI presented in the preceding column. *I*<sup>2</sup> describes the percentage of variability in effect estimates that may be due to heterogeneity rather than chance. Roughly, 0.3 – 0.6 may be considered moderate heterogeneity.

**Table 7. Main effects of maternal SQ-LNS vs MMS on adverse outcomes<sup>1</sup>**

| Adverse outcomes                                      | Number of participants (trials) | SQ-LNS events per 1000 | MMS events per 1000 | RR and difference in events per 1000 (95% CI) <sup>2</sup> | P value <sup>3</sup> | Heterogeneity <i>I</i> <sup>2</sup> | Quality of the evidence (GRADE) |
|-------------------------------------------------------|---------------------------------|------------------------|---------------------|------------------------------------------------------------|----------------------|-------------------------------------|---------------------------------|
| Cesarian-Section                                      | 1491 (2)                        | 129                    | 103                 | 1.25 (0.94, 1.66)<br>27.0 (-2.1, 56.2)                     | 0.125<br>0.069       | 0.00<br>0.00                        | Low                             |
| Miscarriage                                           | 1566 (2)                        | 16                     | 16                  | 1.00 (0.47, 2.13)<br>-0.1 (-11.3, 11.2)                    | 0.994<br>0.991       | 0.00<br>0.00                        | Low                             |
| Stillbirth                                            | 1566 (2)                        | 21                     | 11                  | 1.57 (0.61, 4.03)<br>9.9 (-2.9, 22.7)                      | 0.344<br>0.129       | 0.85<br>0.87                        | Low                             |
| Miscarriage or stillbirth                             | 1566 (2)                        | 39                     | 28                  | 1.33 (0.76, 2.34)<br>14.7 (-2.9, 32.2)                     | 0.320<br>0.102       | 0.79<br>0.73                        | Low                             |
| Early neonatal mortality                              | 1470 (2)                        | 19                     | 17                  | 0.96 (0.44, 2.09)<br>4.0 (-9.1, 17.2)                      | 0.924<br>0.550       | 0.61<br>0.59                        | Low                             |
| Miscarriage or stillbirth or early neonatal mortality | 1566 (2)                        | 57                     | 46                  | 1.24 (0.81, 1.91)<br>11.3 (-10.7, 33.3)                    | 0.321<br>0.313       | 0.00<br>0.00                        | Low                             |
| Neonatal mortality                                    | 1473 (2)                        | 23                     | 19                  | 1.05 (0.52, 2.10)<br>4.5 (-9.9, 19.0)                      | 0.896<br>0.537       | 0.47<br>0.38                        | Low                             |
| Mortality 0-6 mo                                      | 1483 (2)                        | 30                     | 28                  | 1.00 (0.56, 1.78)<br>4.6 (-11.7, 20.9)                     | 0.988<br>0.584       | 0.43<br>0.33                        | Low                             |

<sup>1</sup>GRADE, Grading of Recommendations Assessment, Development and Evaluation; MMS, multiple micronutrient supplement; RR, relative risk; SQ-LNS, small-quantity lipid-based nutrient supplement

<sup>2</sup>Values are RRs: LNS compared with MMS (95% CIs). Difference in events per 1000 was calculated using the prevalence difference (95% CI) and multiplying by 1000.

<sup>3</sup>The P value column corresponds to the pooled main effect 2-sided superiority testing of the intervention effect estimate and 95% CI presented in the preceding column. *I*<sup>2</sup> describes the percentage of variability in effect estimates that may be due to heterogeneity rather than chance. Roughly, 0.3 – 0.6 may be considered moderate heterogeneity.

## Figure Legends

Figure 1: Study flow diagram. IFA, iron and folic acid supplements; IPD, individual participant data; MMS, multiple micronutrient supplements; RCT, randomized controlled trial; SOC, standard of care; SQ-LNS, small-quantity lipid-based nutrient supplements.

Figures 2A-F: Forest plots of effect of SQ-LNS vs IFA/SOC on birth weight, LBW, newborn LAZ, newborn HCZ, newborn BMIZ and duration of gestation. BMIZ, body mass index z-score; HCZ, head circumference-for-age z-score; IFA, iron and folic acid; LAZ, length-for-age z-score; LNS, lipid-based nutrient supplements; LBW, low birthweight; MD, mean difference; RR, relative risk; SOC, standard of care; SQ-LNS, small-quantity lipid-based nutrient supplements. Individual study estimates were generated from log-binomial regression for binary outcomes and linear regression for continuous outcomes controlling for baseline measure when available and using robust standard errors for cluster-randomized trials. Pooled estimates were generated using inverse-variance weighting with both fixed and random effects.

Figures 3A-J: Pooled effects of SQ-LNS vs IFA/SOC on birth outcomes, stratified by selected effect modifiers. LNS, lipid-based nutrient supplements; P-for-interaction, p-value for the interaction indicating the difference in effects of SQ-LNS between the two levels of the effect modifier; PR, prevalence ratio; SQ-LNS, small-quantity lipid-based nutrient supplements.

Individual study estimates (not shown) were generated from log-binomial regression for binary outcomes and linear regression for continuous outcomes controlling for baseline measure when available and using robust standard errors for cluster-randomized trials. Pooled estimates (shown here) were generated using inverse-variance weighting with fixed effects.

Figures 4A,B: Pooled effects of SQ-LNS vs IFA/SOC on anthropometric outcomes at 6 mo of age, stratified by infant sex. LNS, lipid-based nutrient supplements; P-for-interaction, p-value for the interaction indicating the difference in effects of SQ-LNS between the two levels of the effect modifier; PR, prevalence ratio; SQ-LNS, small-quantity lipid-based nutrient supplements. Individual study estimates (not shown) were generated from log-binomial regression for binary outcomes and linear regression for continuous outcomes controlling for baseline measure when available and using robust standard errors for cluster-randomized trials. Pooled estimates (shown here) were generated using inverse-variance weighting with fixed effects.

Figures 5A-C: Forest plots of effect of SQ-LNS vs MMS on birth weight, newborn LAZ, and newborn HCZ. HCZ, head circumference-for-age z-score; LAZ, length-for-age z-score; LNS, lipid-based nutrient supplements; MD, mean difference; MMS, multiple micronutrient supplements; SQ-LNS, small-quantity lipid-based nutrient supplements. Individual study estimates were generated from log-binomial regression for binary outcomes and linear regression for continuous outcomes controlling for baseline measure when available and using robust standard errors for cluster-randomized trials. Pooled estimates were generated using inverse-variance weighting with both fixed and random effects.

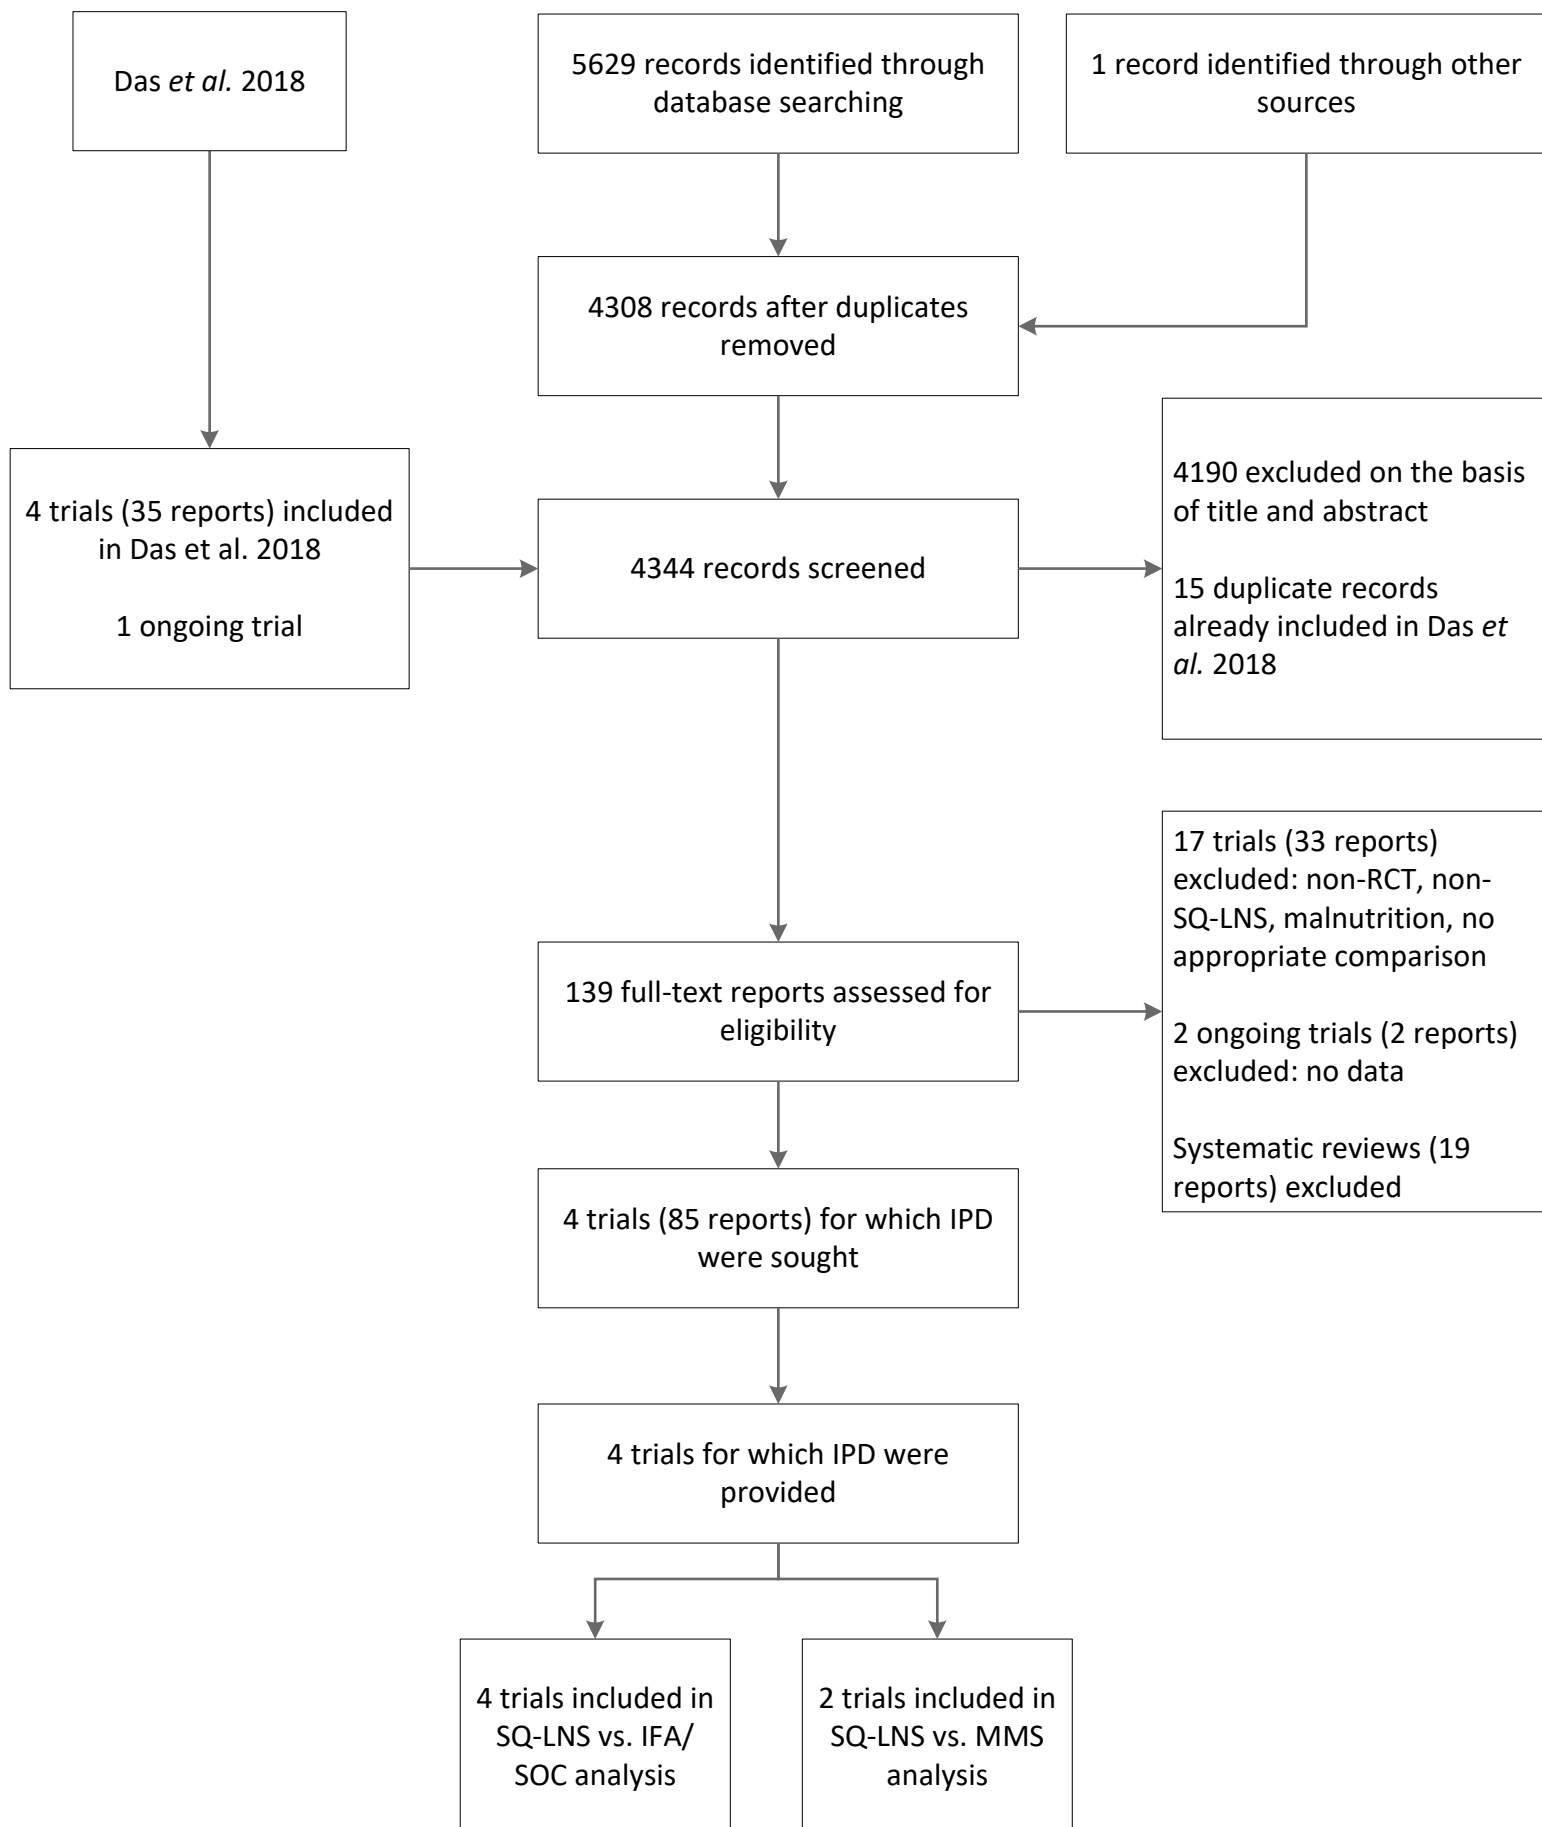

A)

## Birth weight

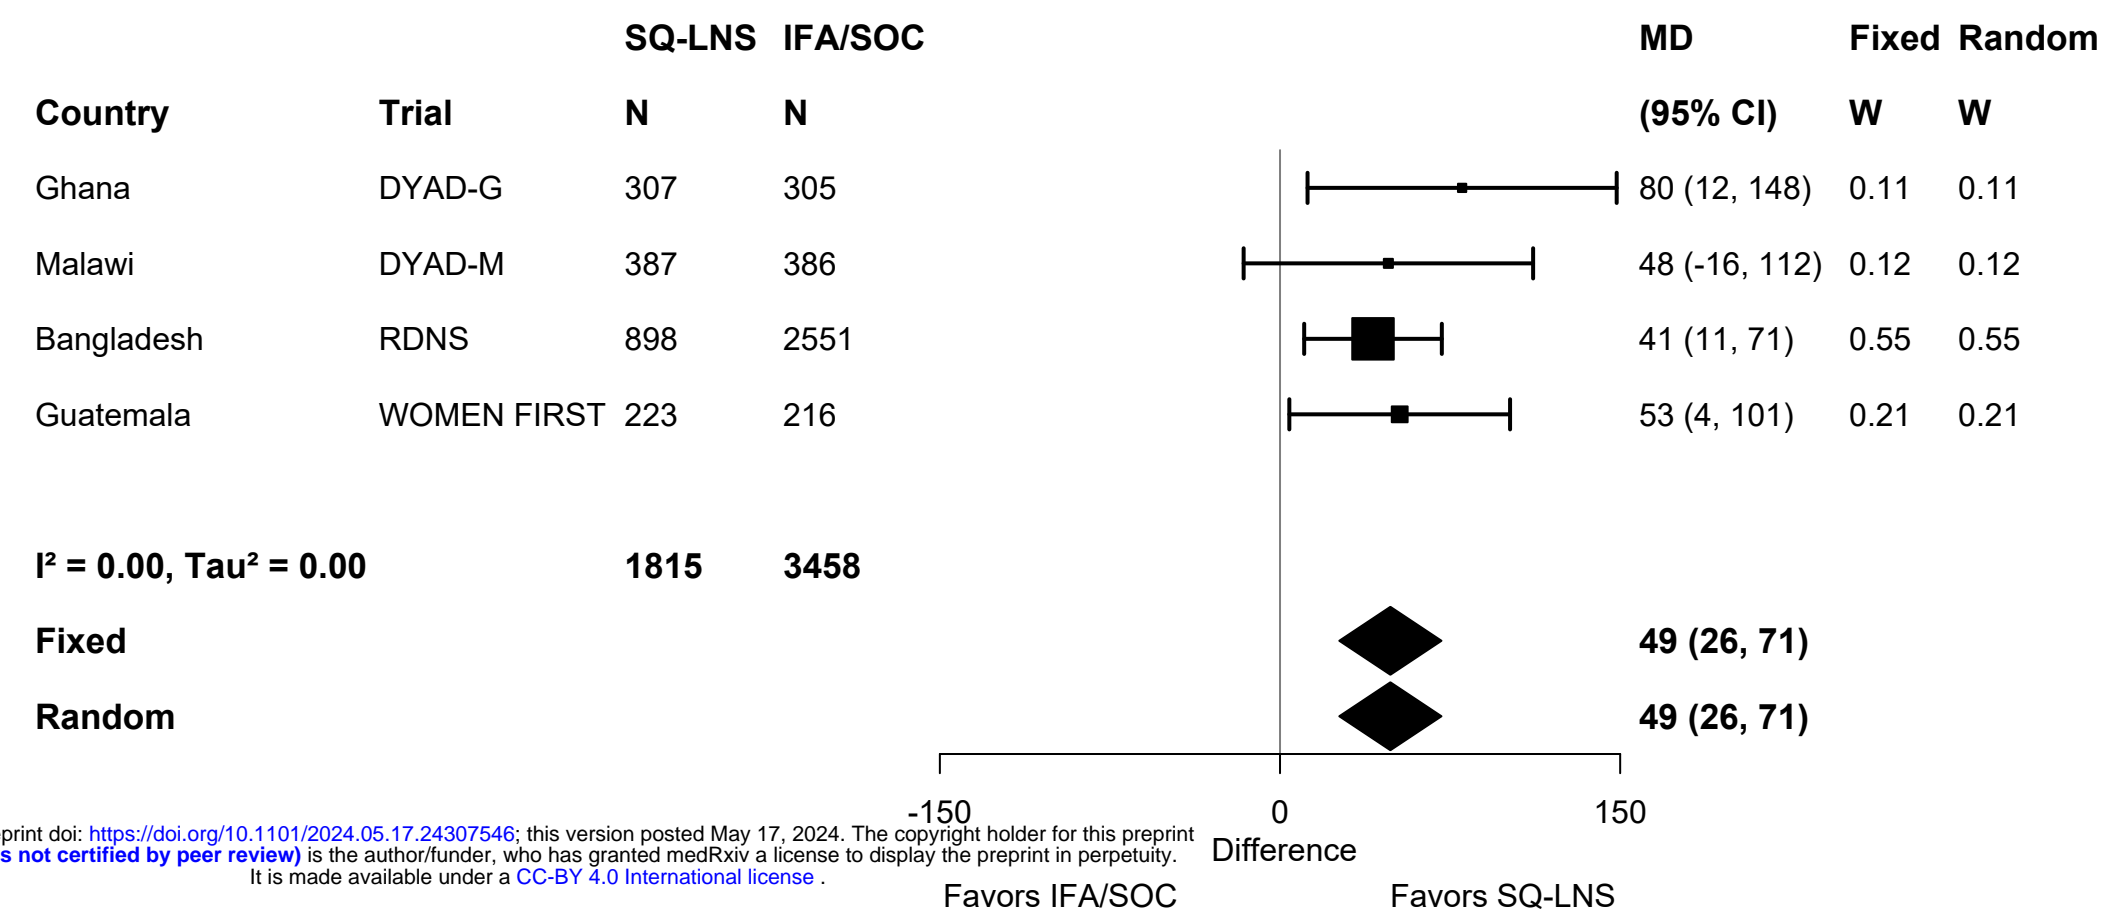

medRxiv preprint doi: <https://doi.org/10.1101/2024.05.17.24307546>; this version posted May 17, 2024. The copyright holder for this preprint (which was not certified by peer review) is the author/funder, who has granted medRxiv a license to display the preprint in perpetuity. It is made available under a [CC-BY 4.0 International license](https://creativecommons.org/licenses/by/4.0/).

B)

## Low birth weight

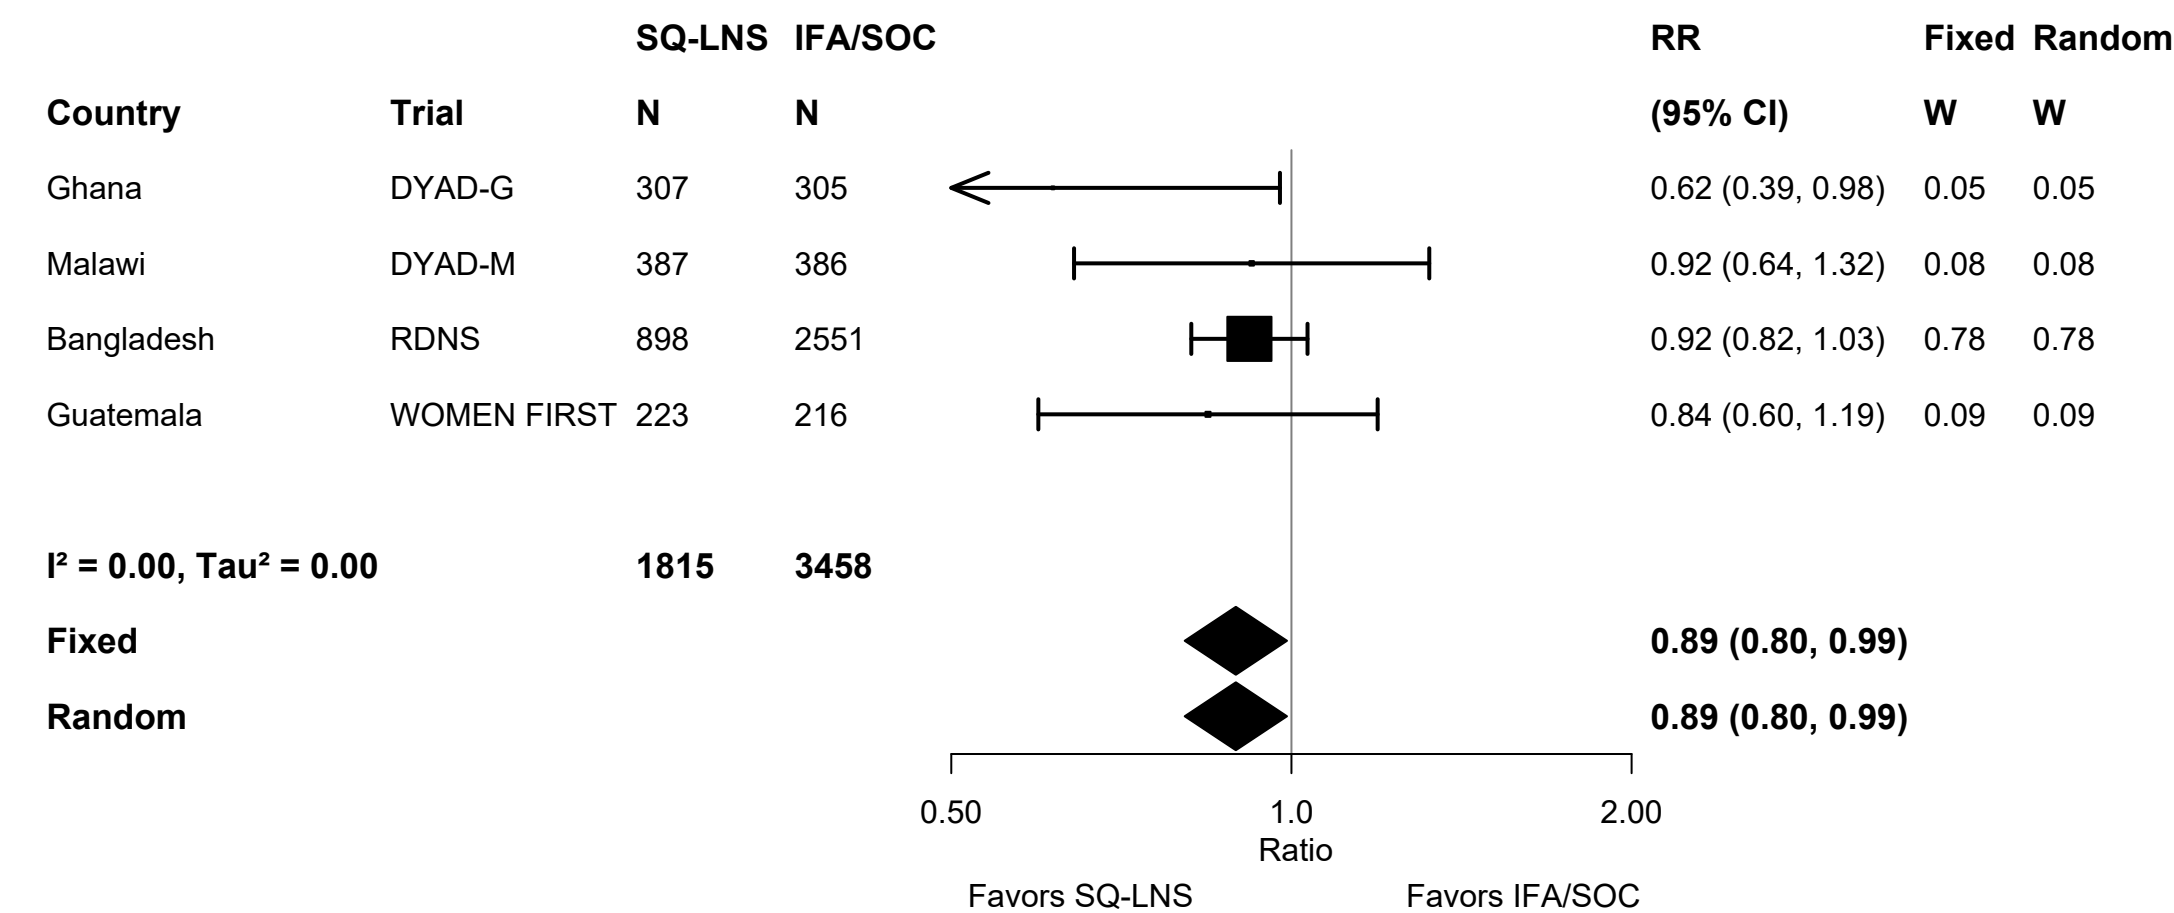

C)

## Newborn LAZ

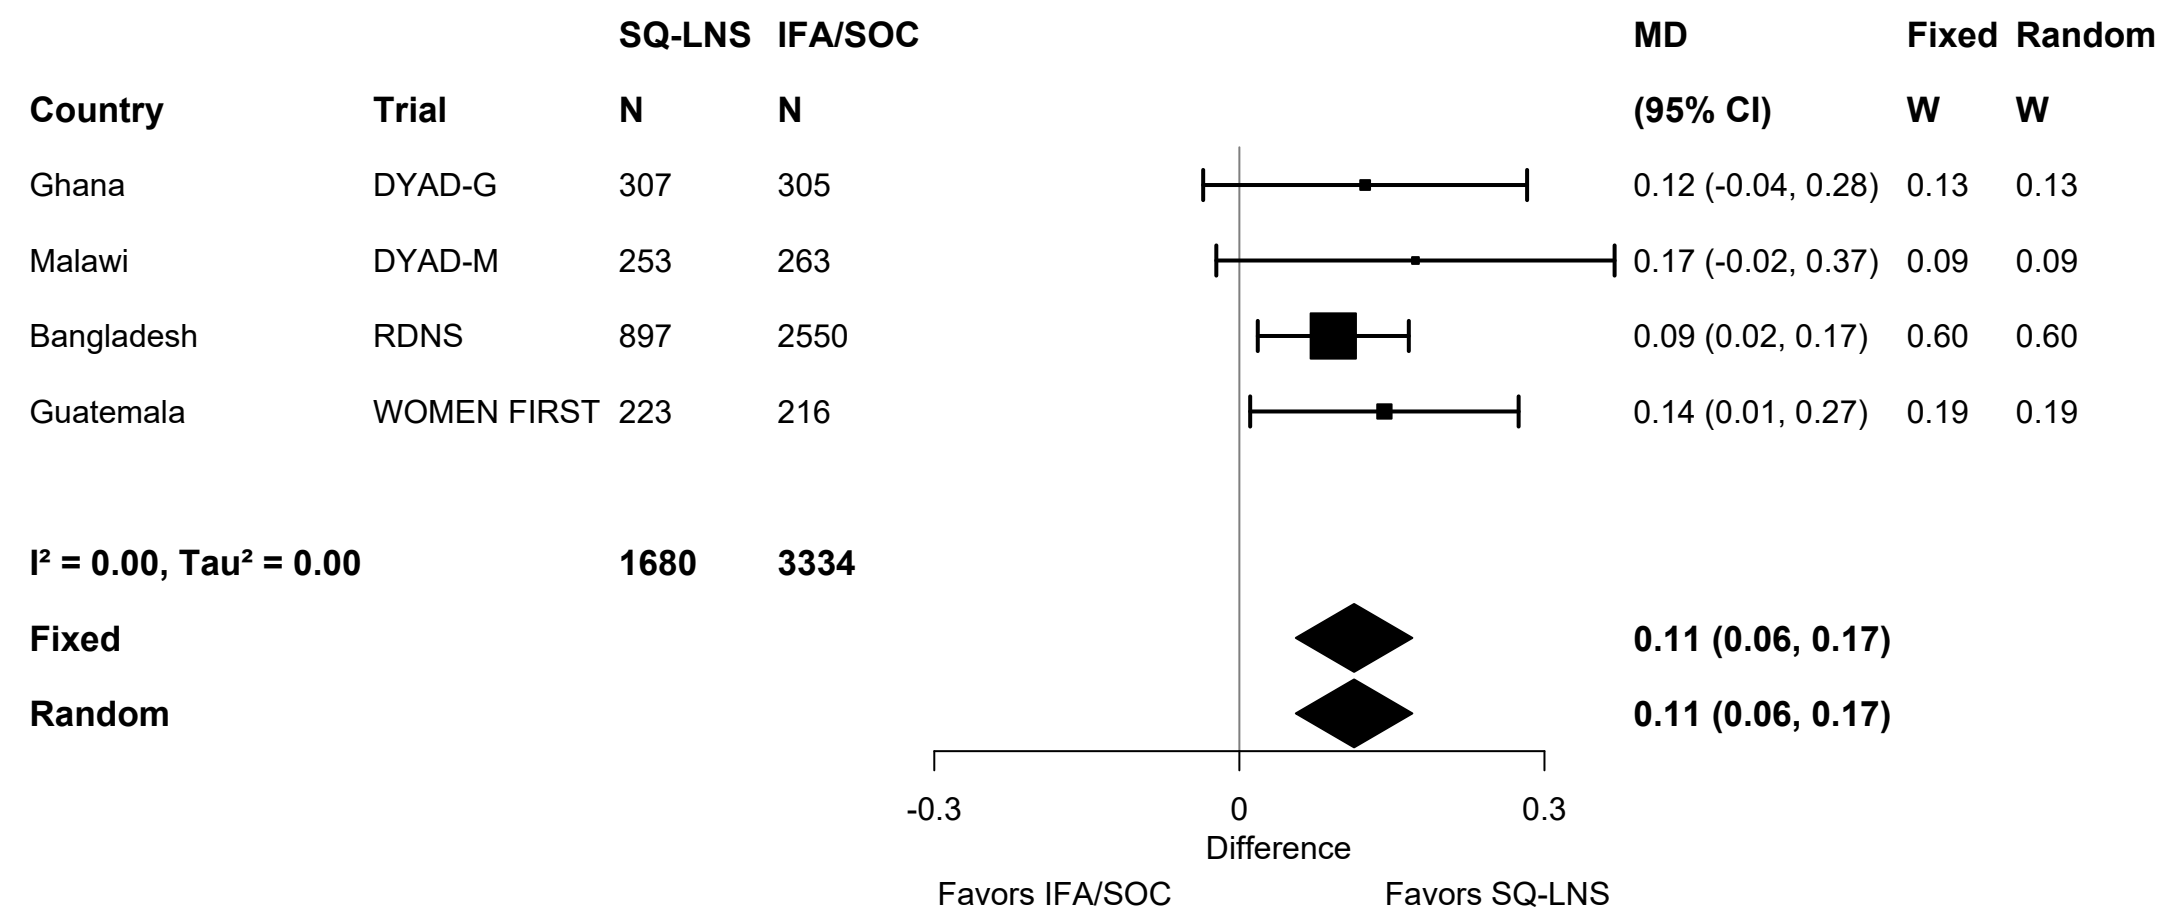

D)

## Newborn HCZ

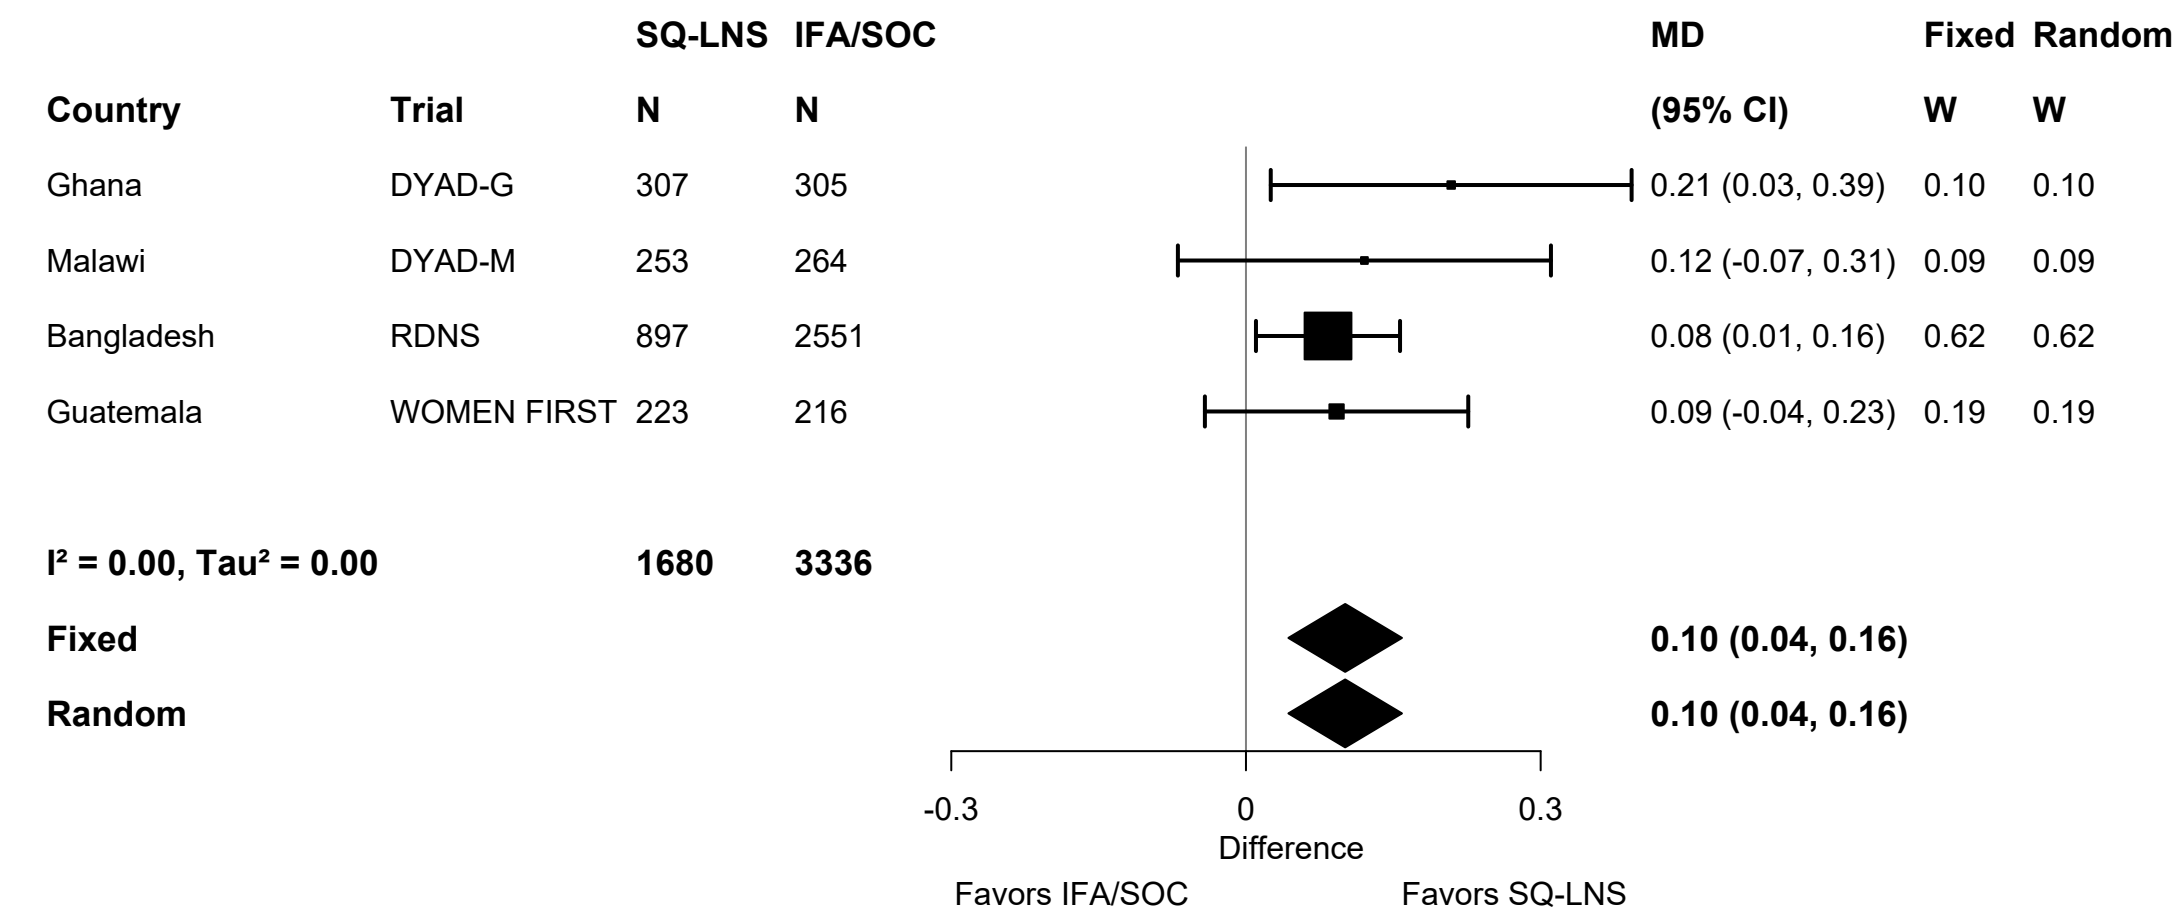

E)

## Newborn BMIZ

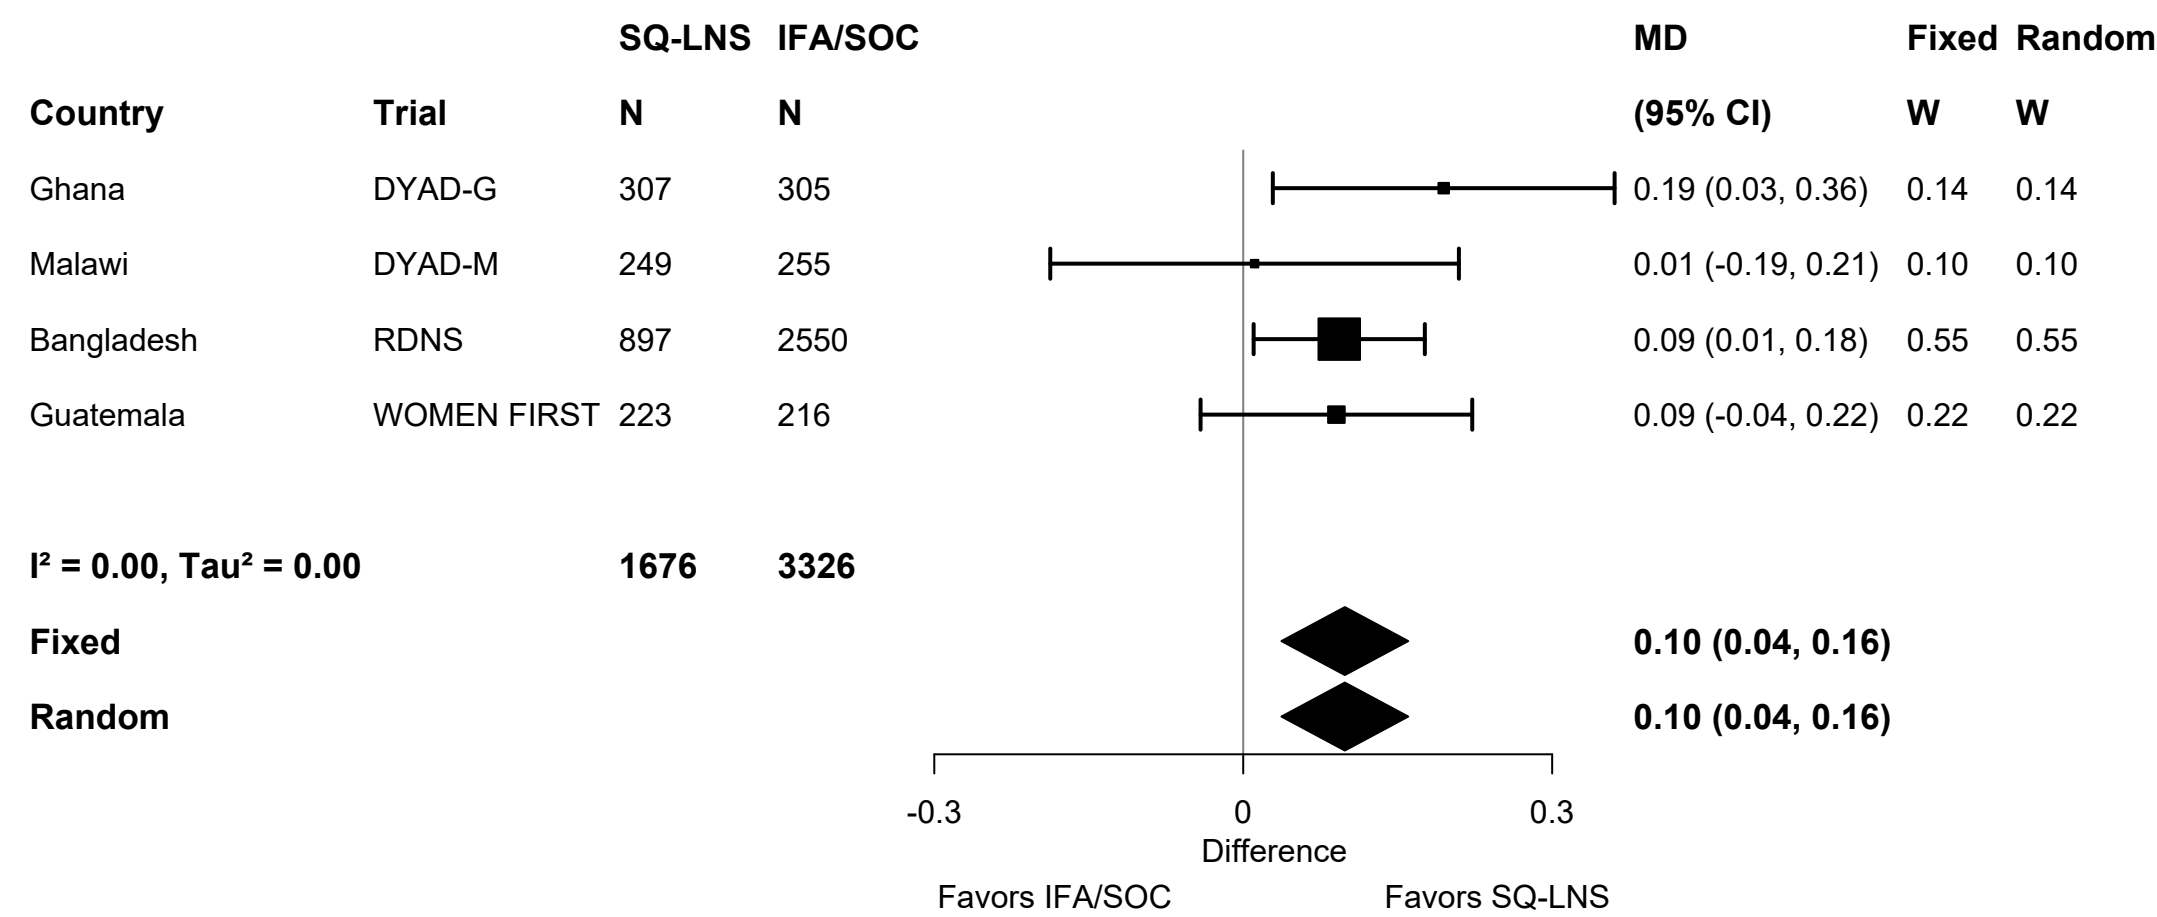

F)

## Pregnancy duration (weeks)

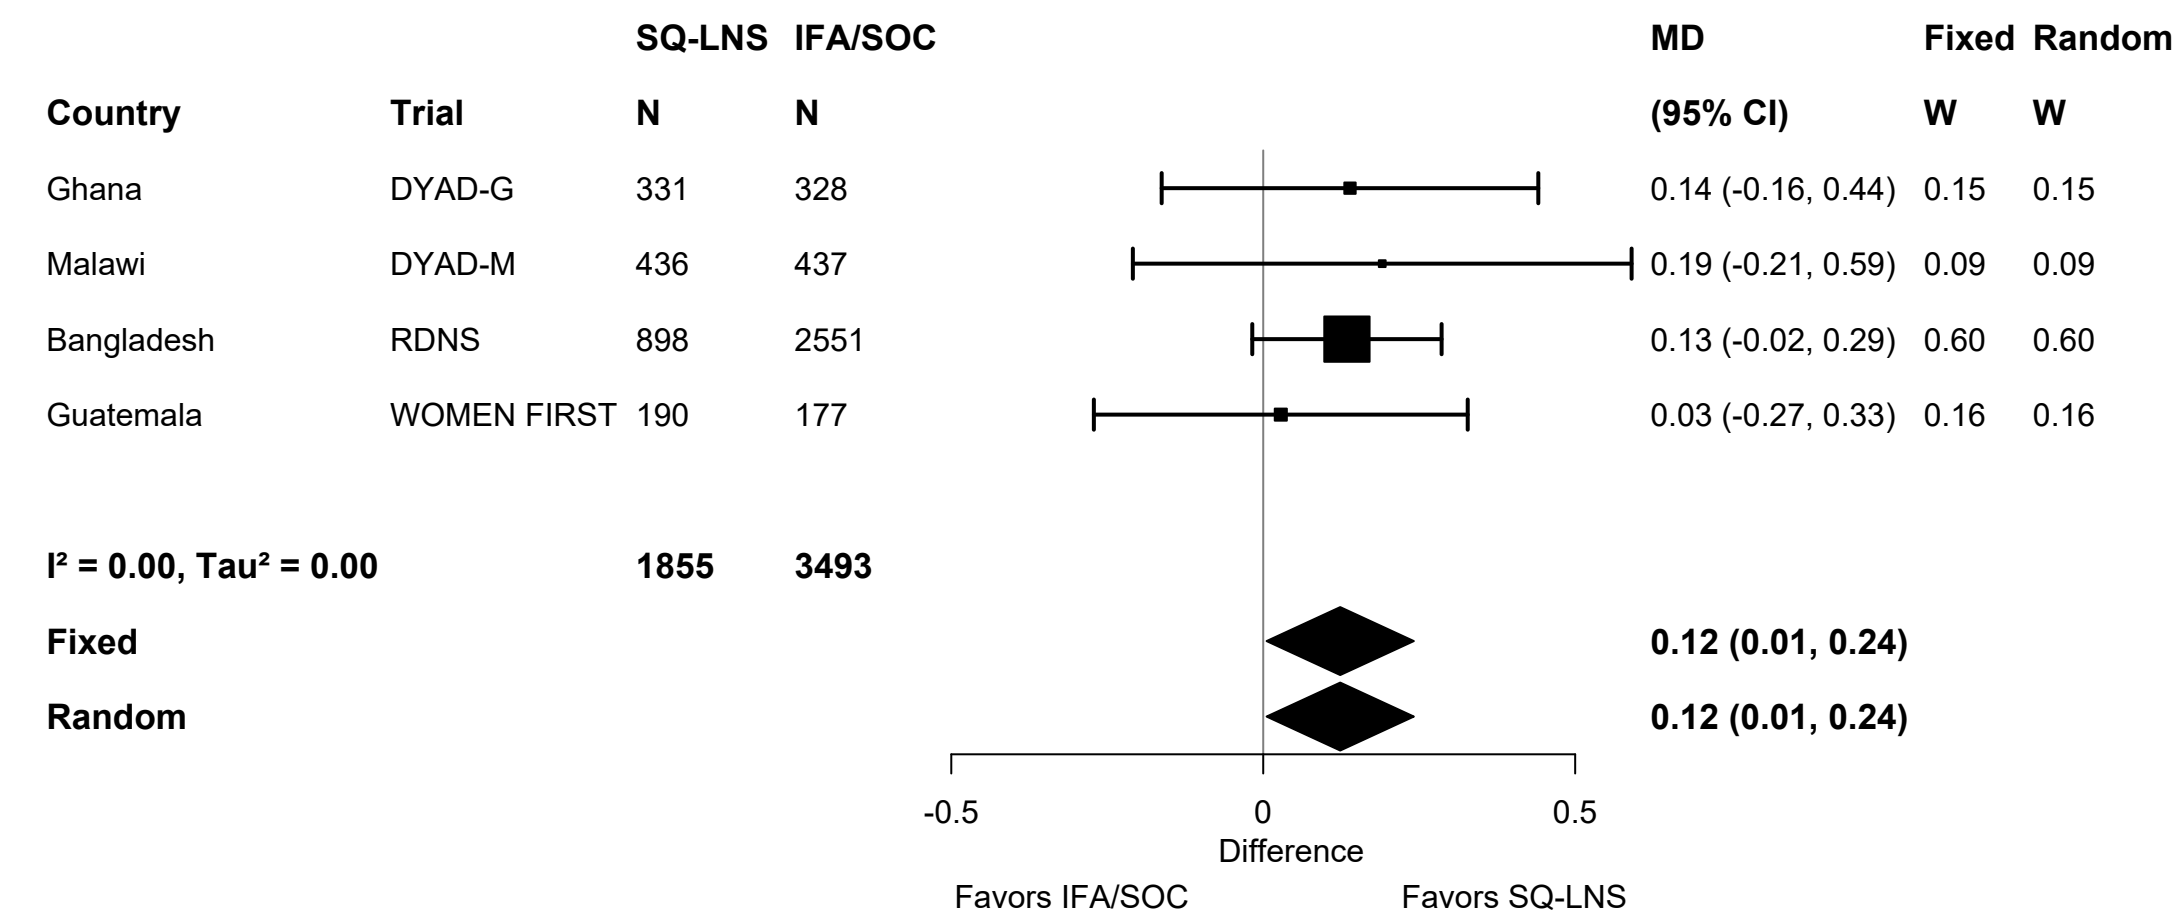



### Birth outcomes stratified by selected effect modifiers, SQ-LNS vs IFA/SOC

#### A) Sex

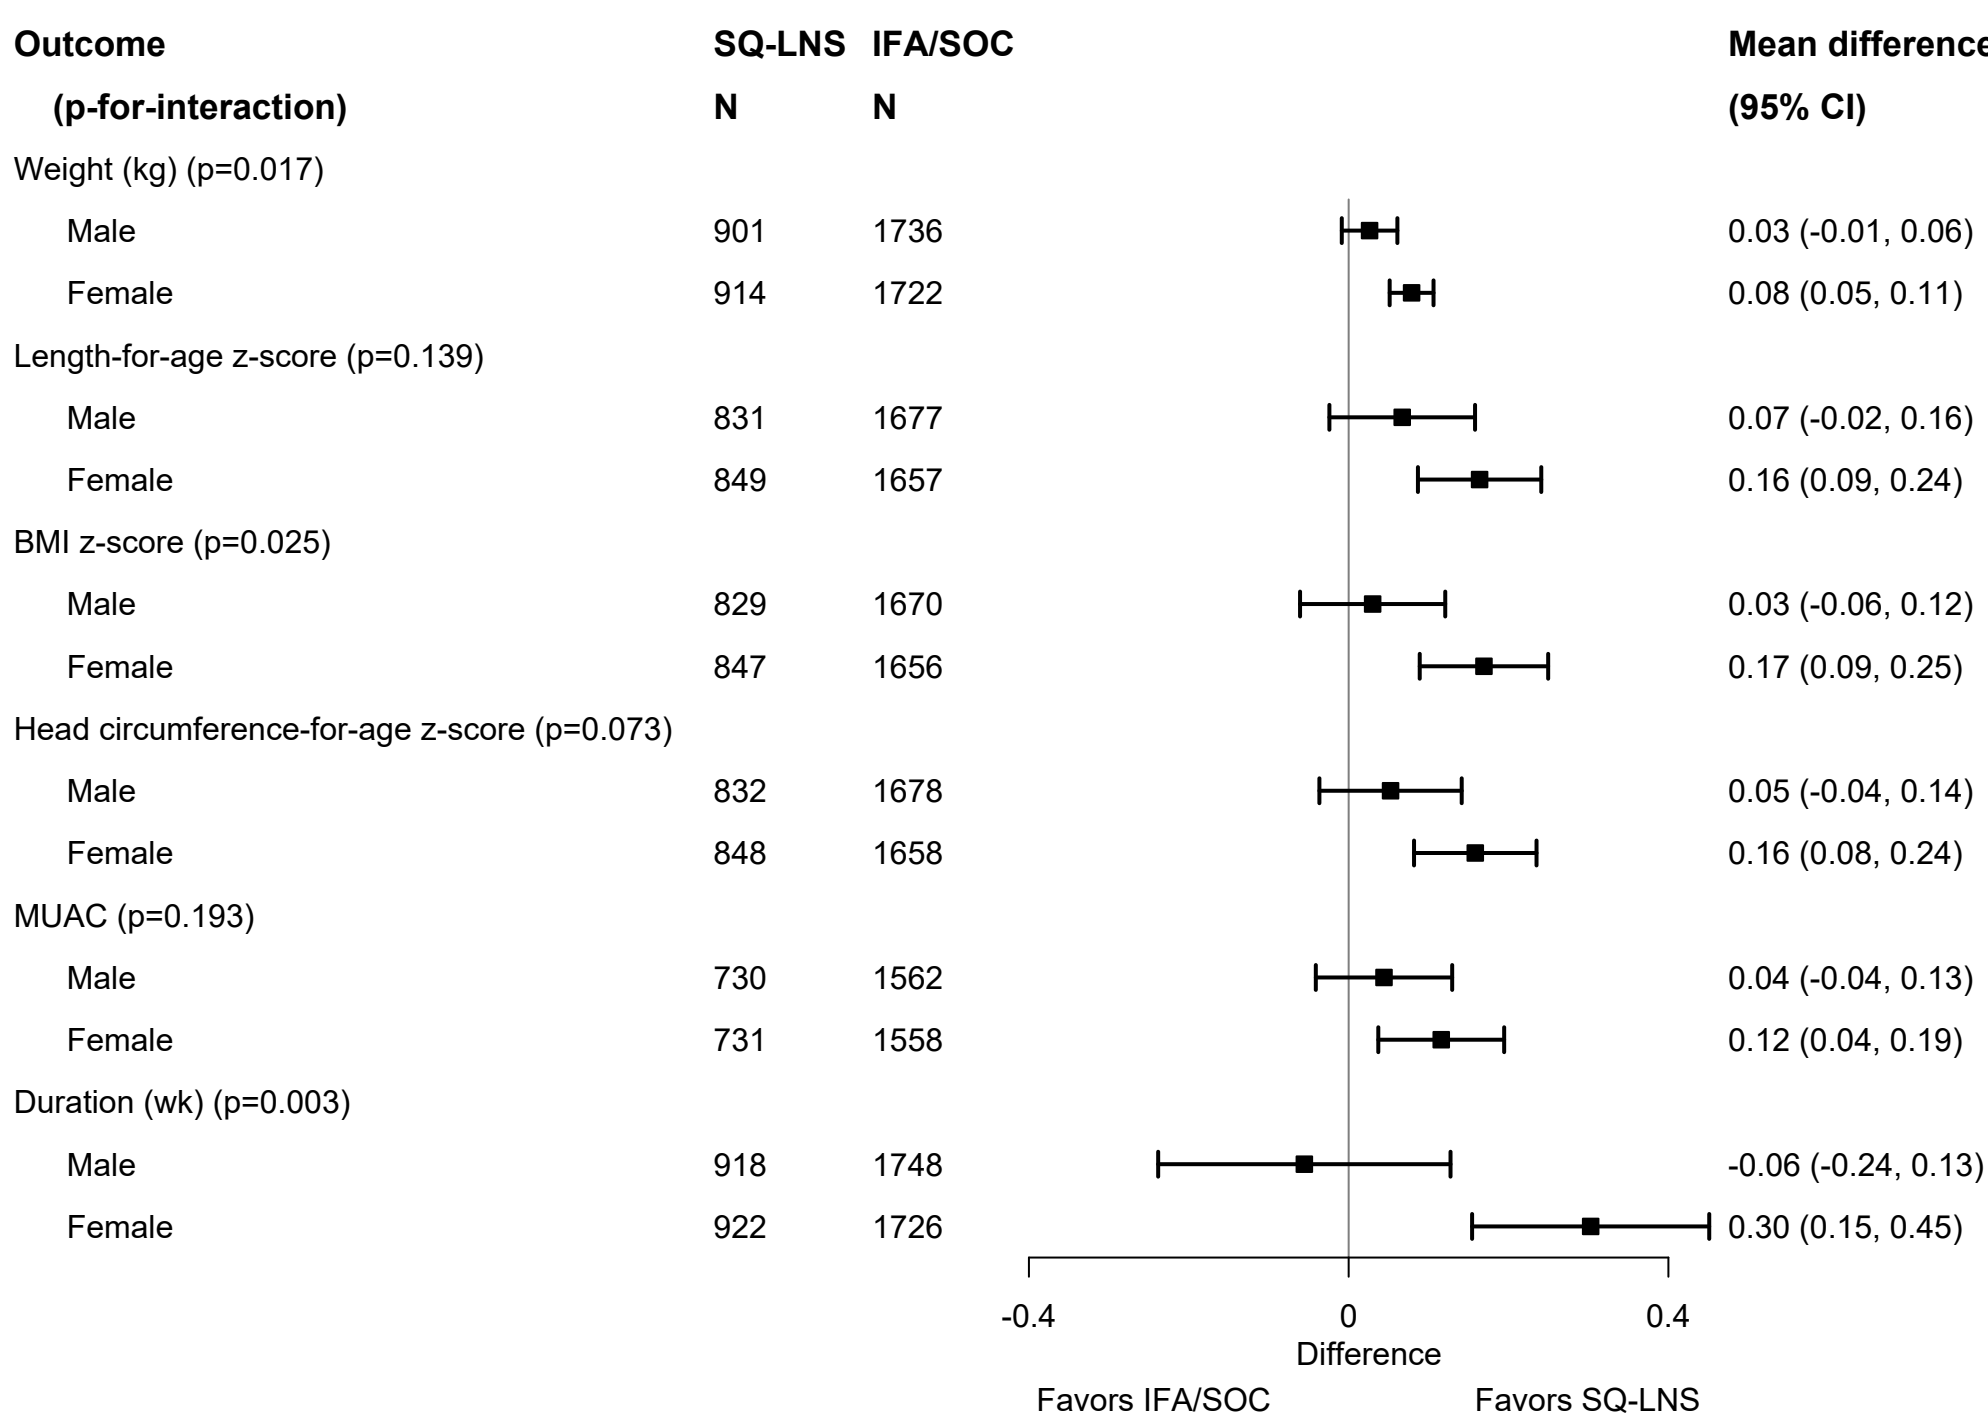

#### B) Sex

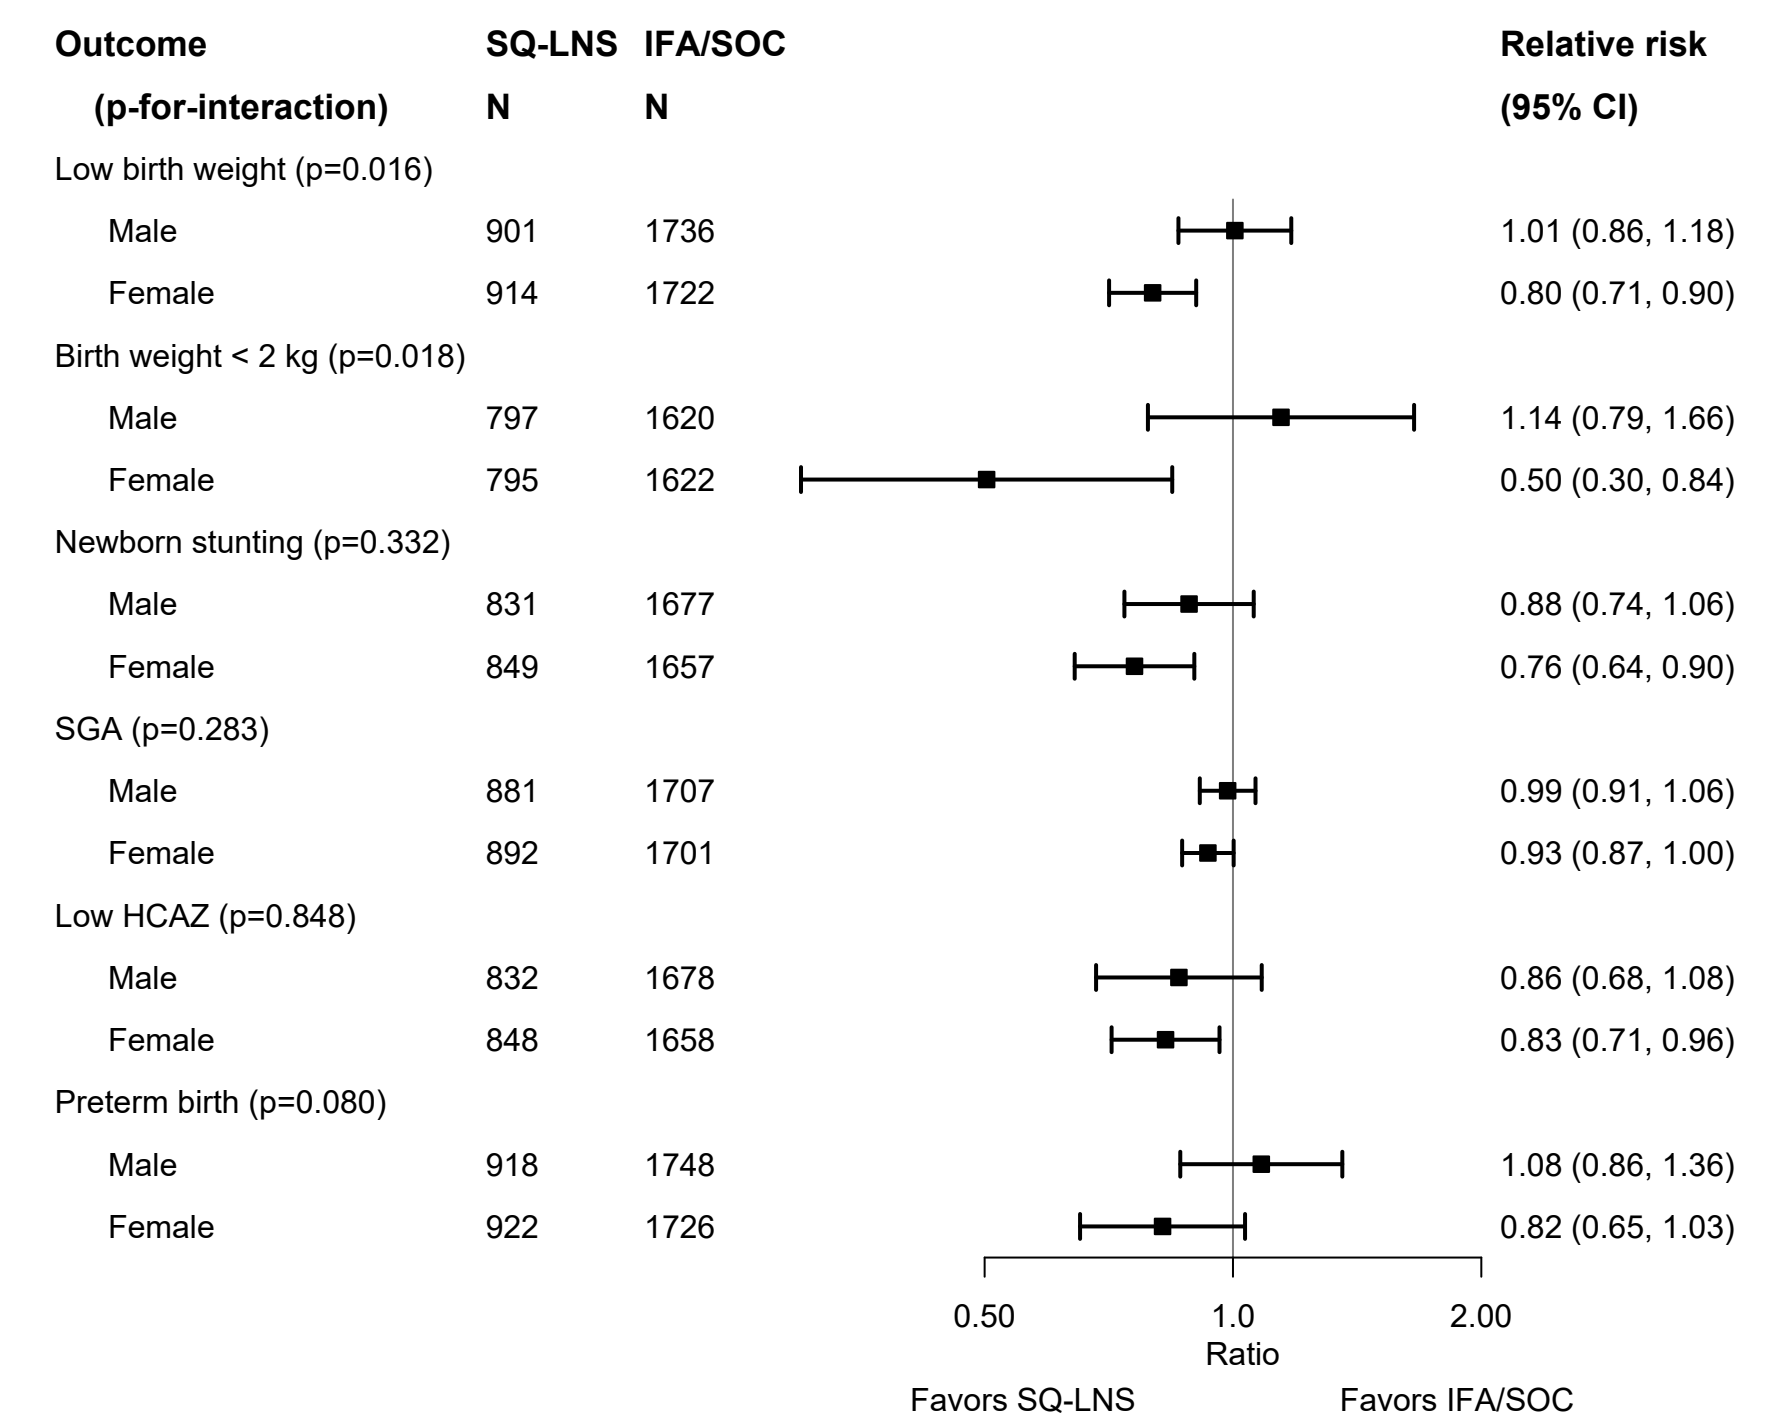

#### C) Maternal BMI

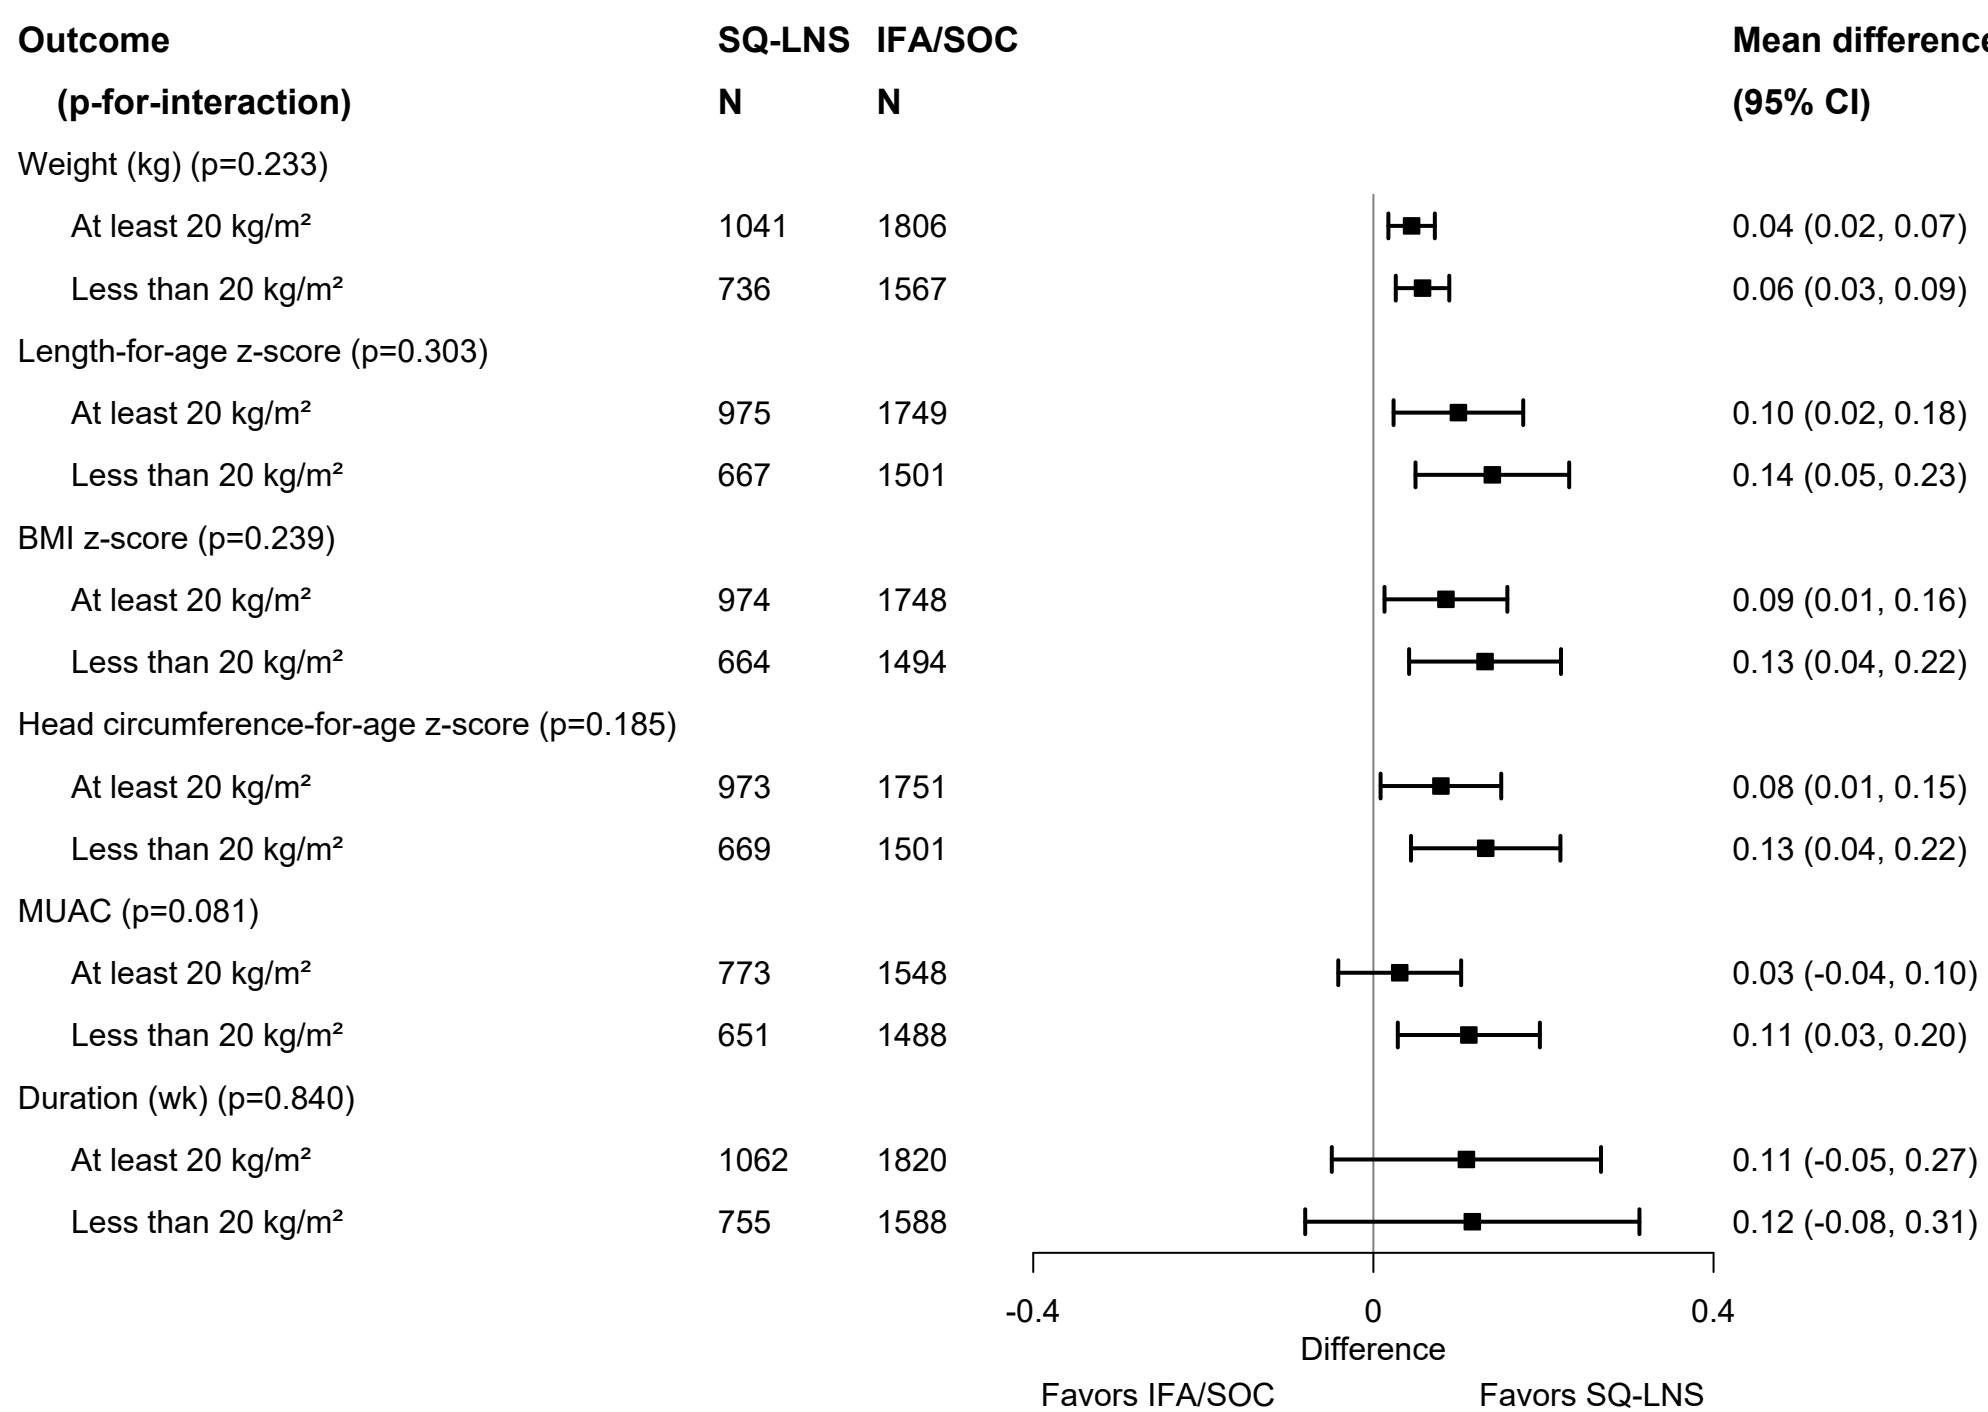

#### D) Maternal BMI

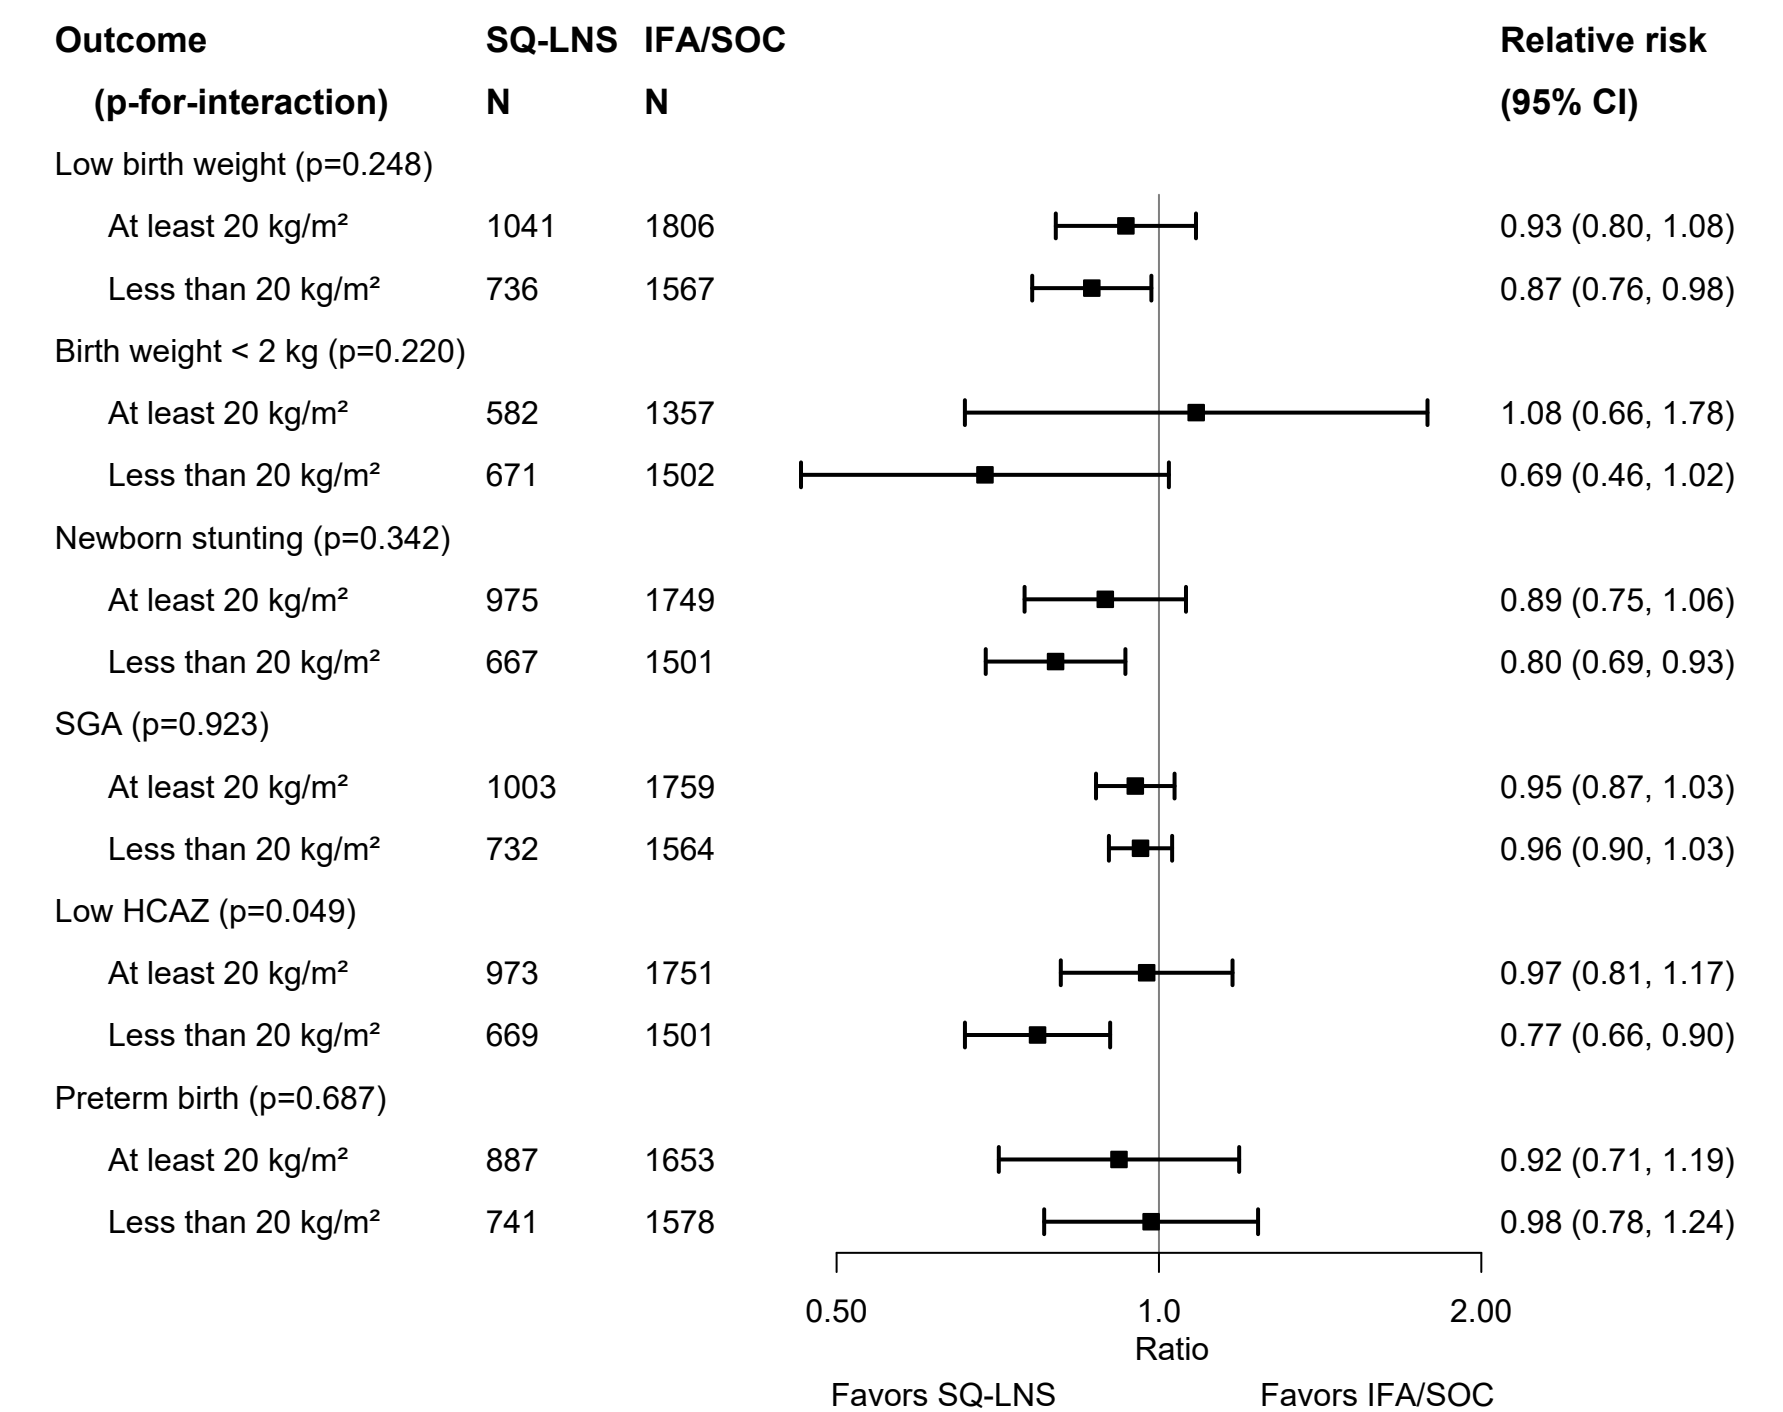

#### E) Maternal age

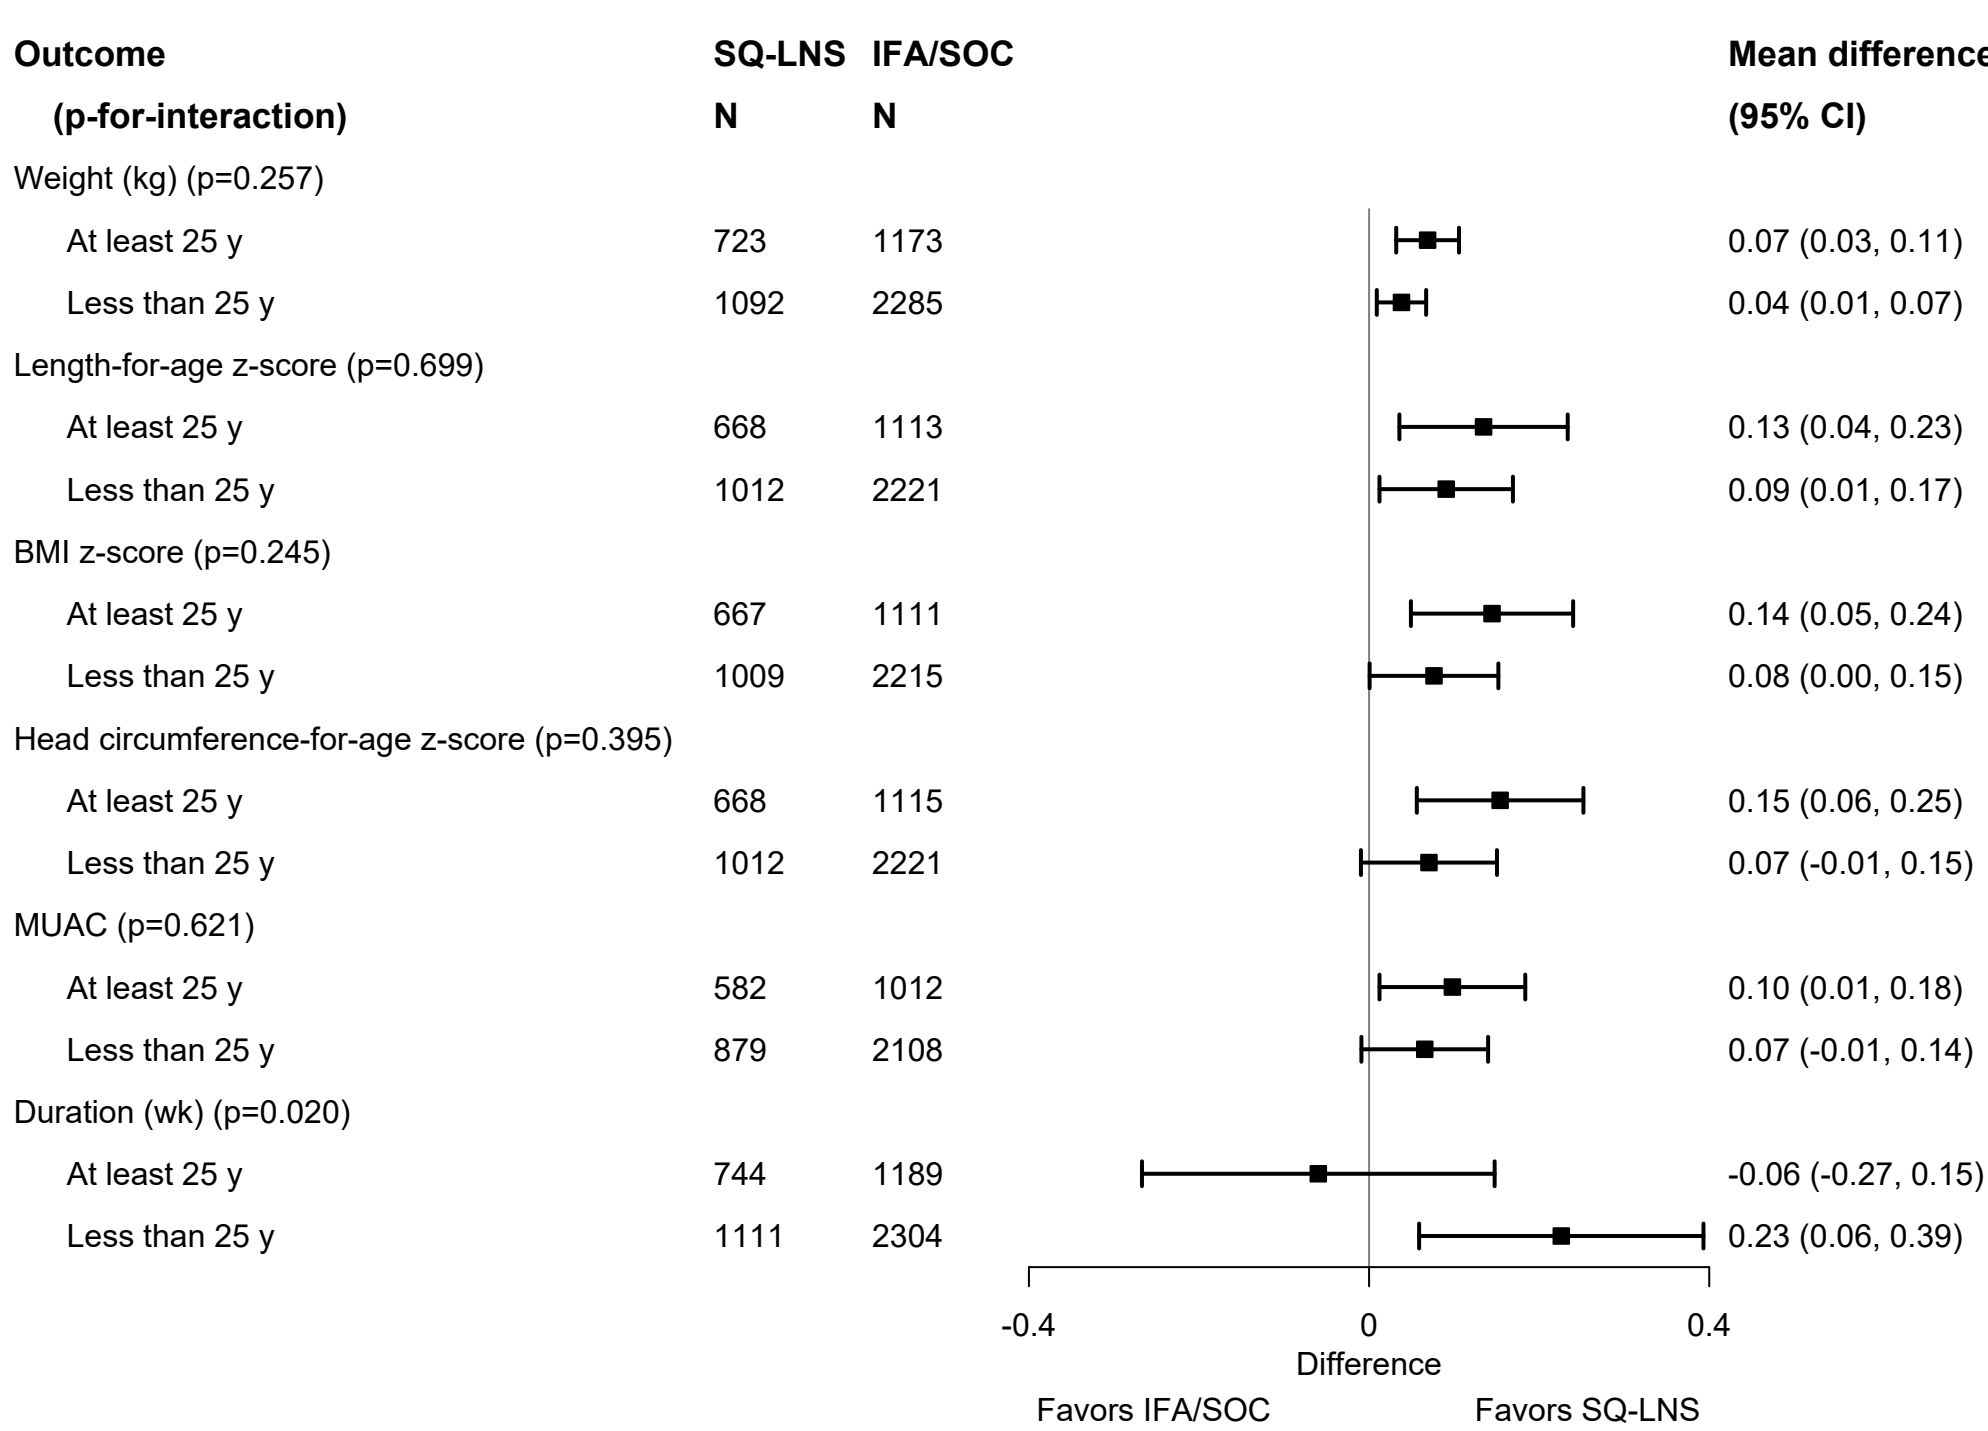

#### F) Maternal age

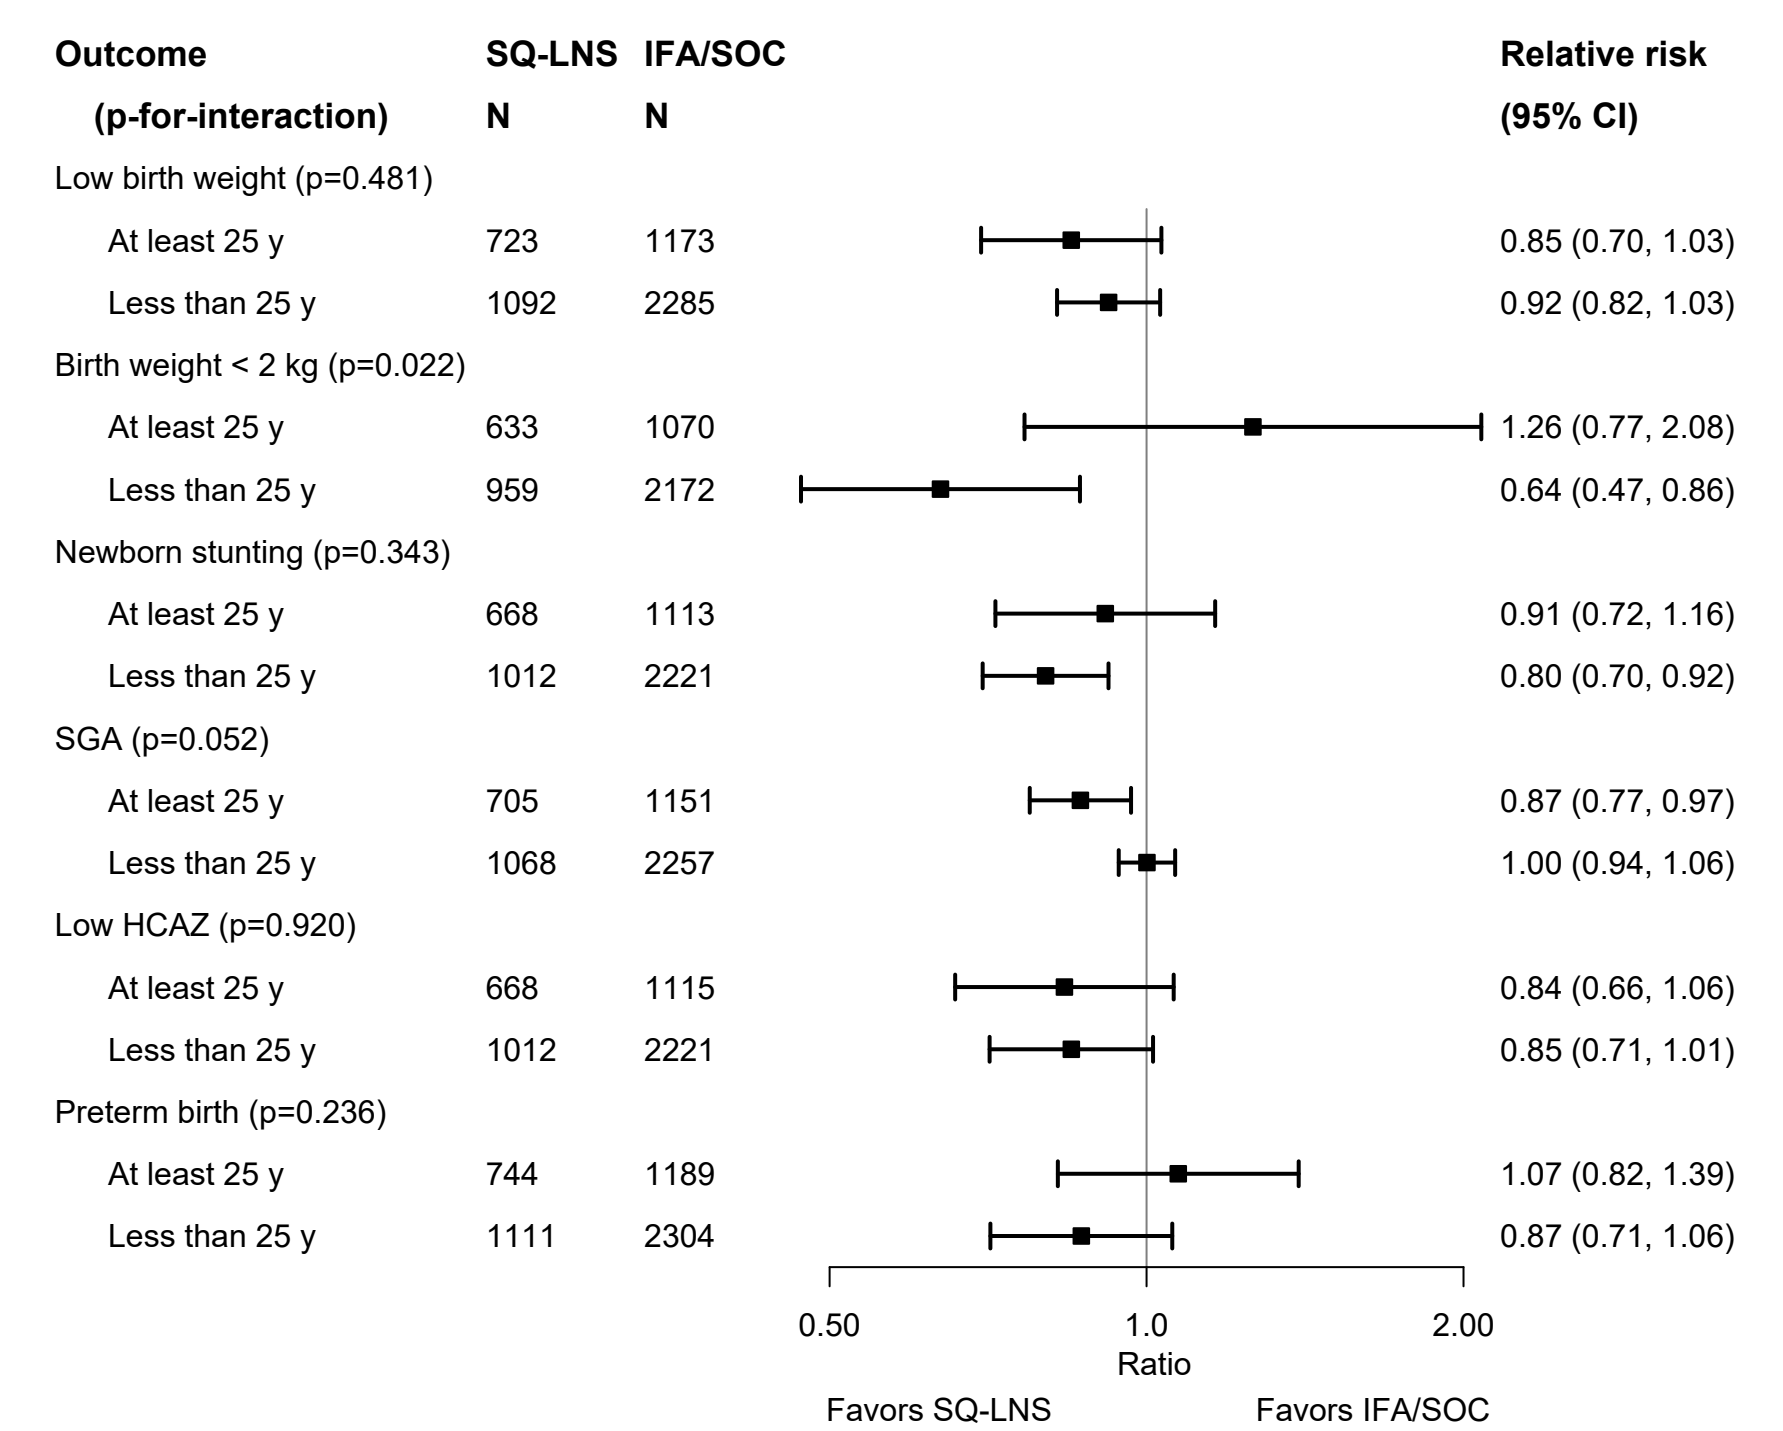

#### G) Maternal inflammation

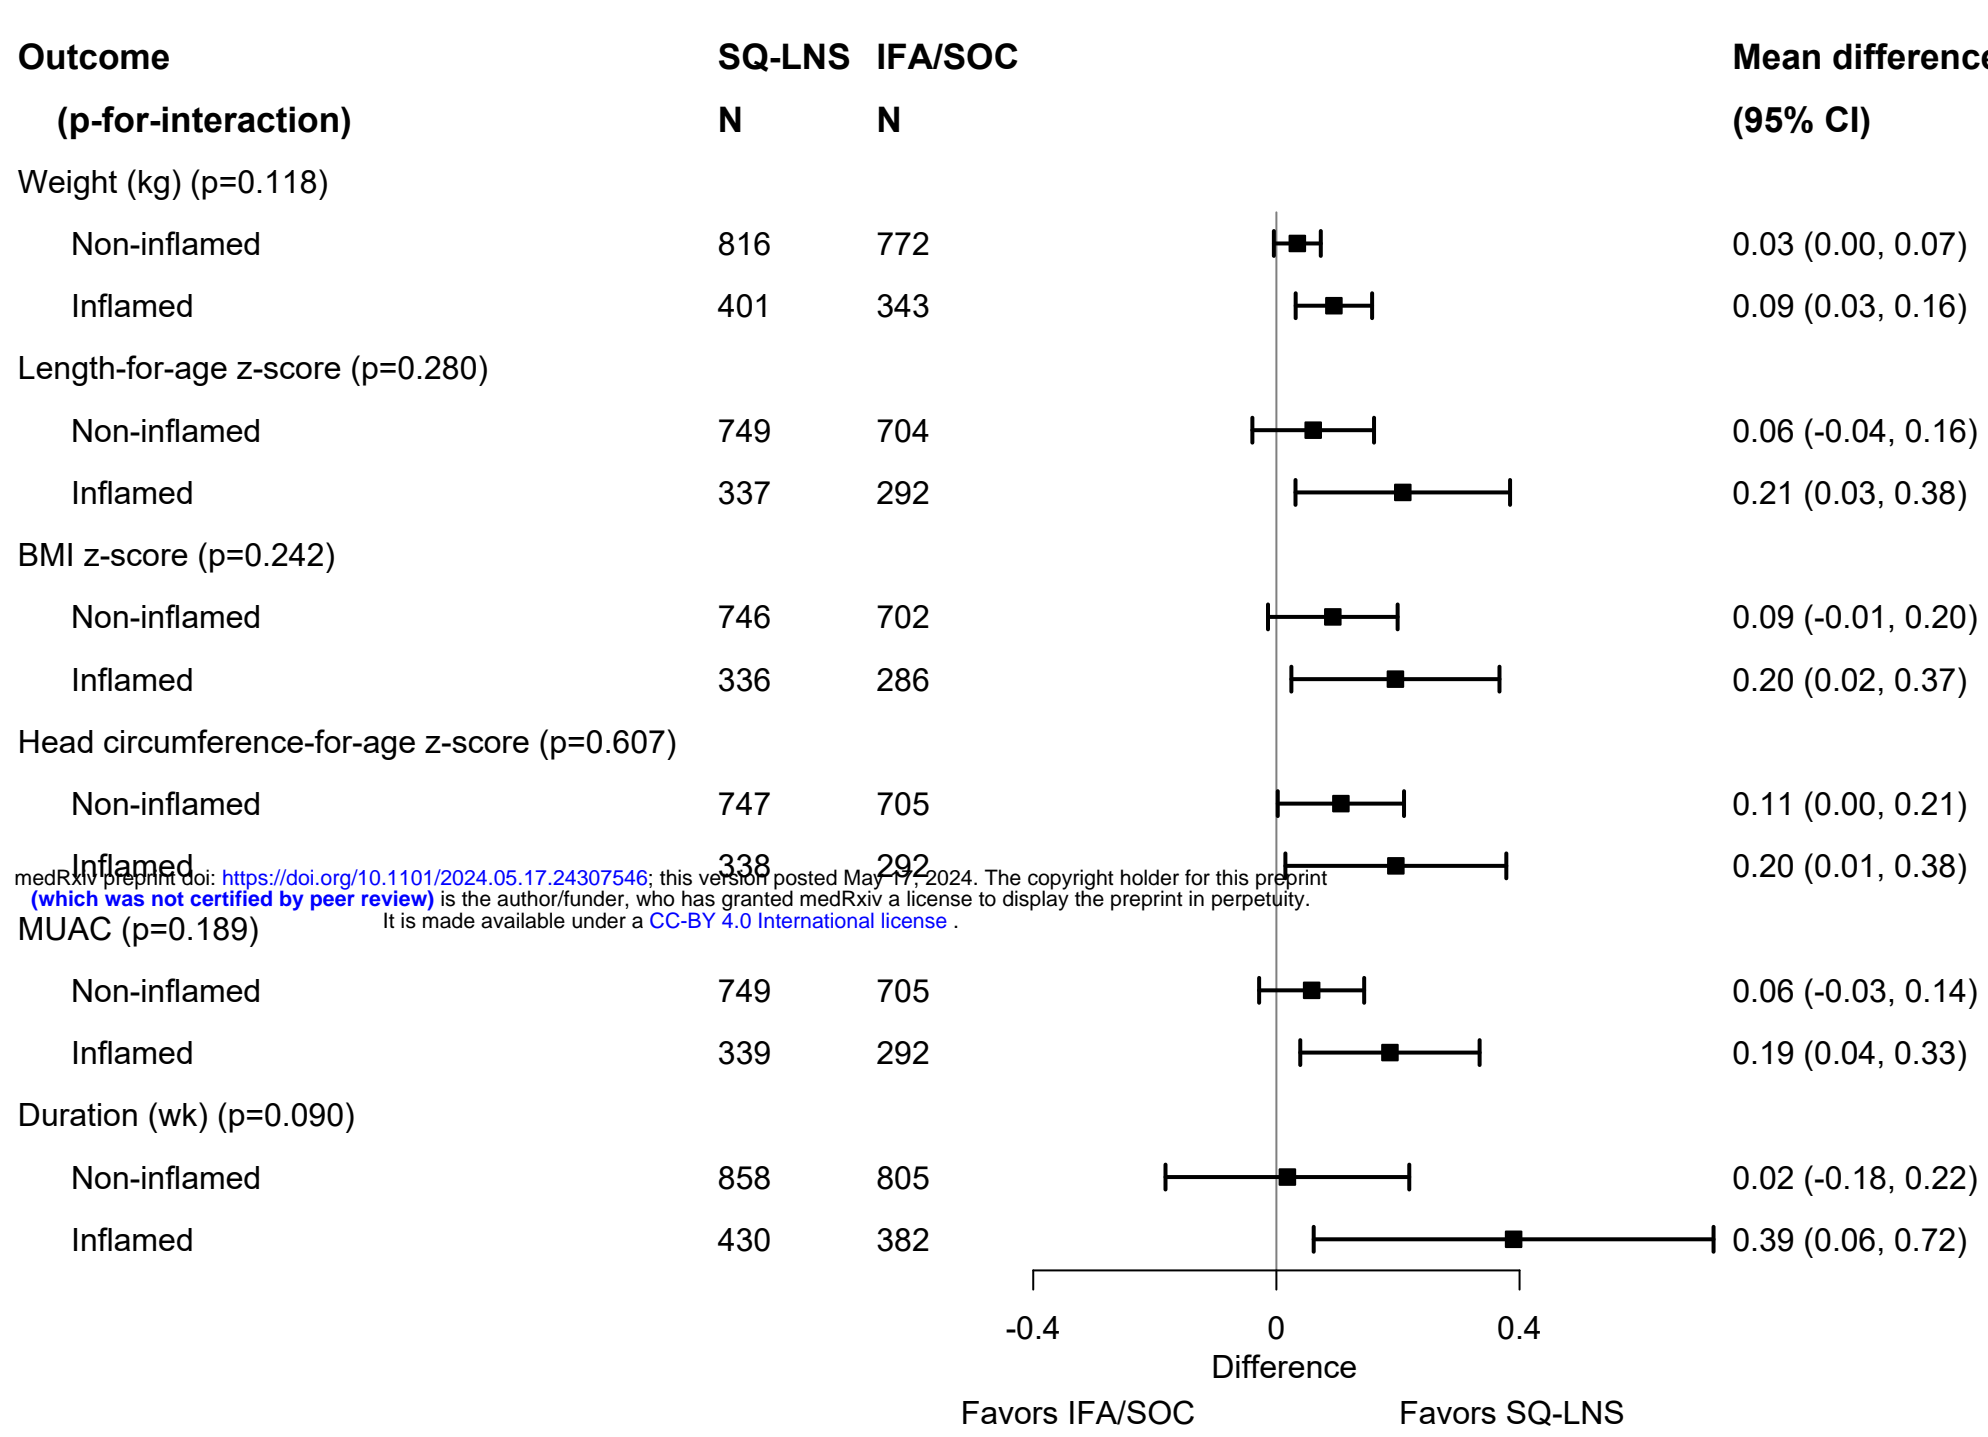

#### H) Maternal inflammation

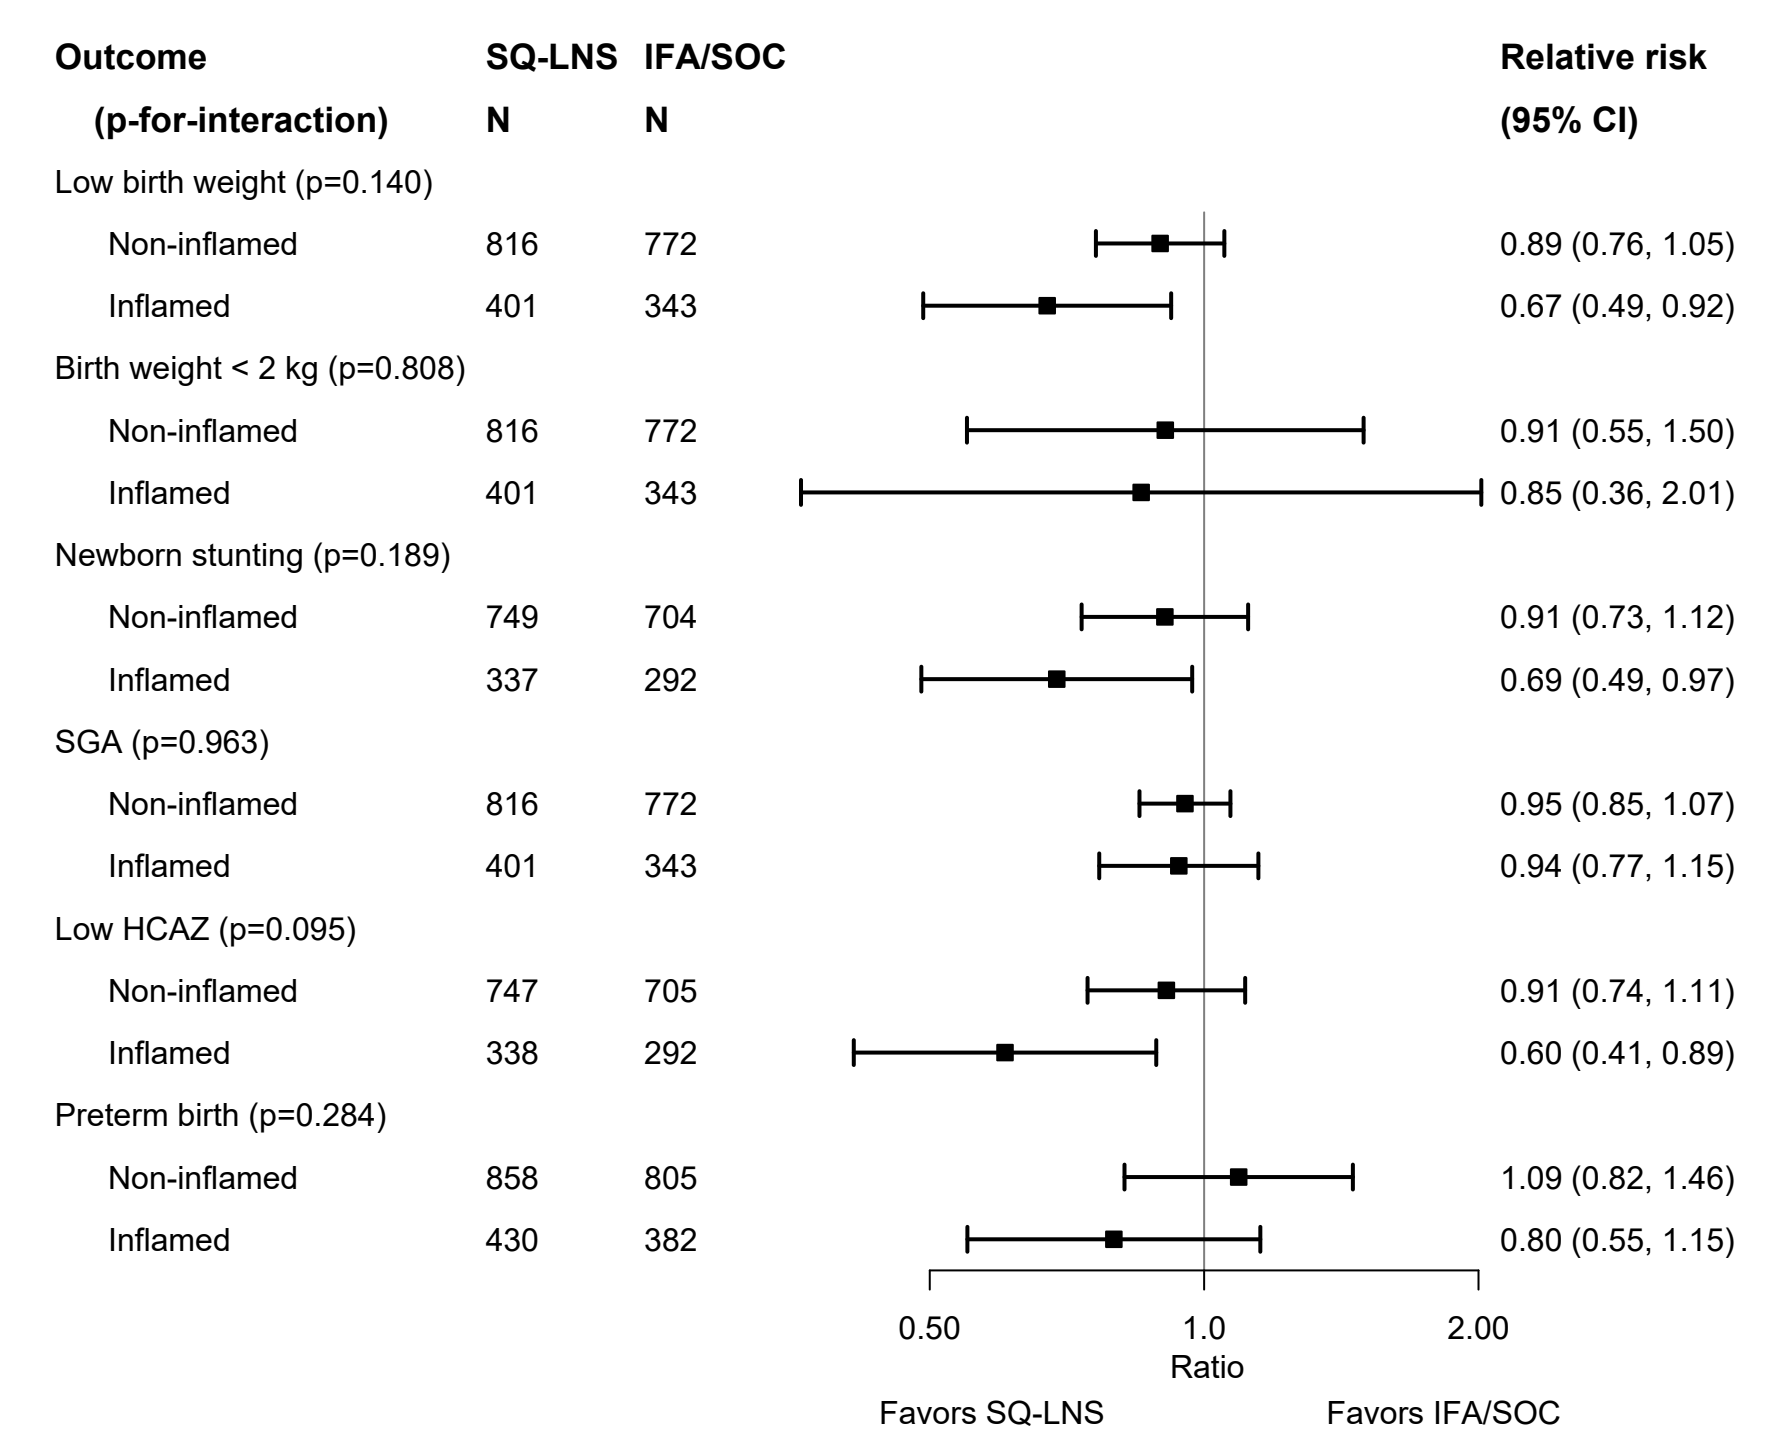

#### I) Food insecurity

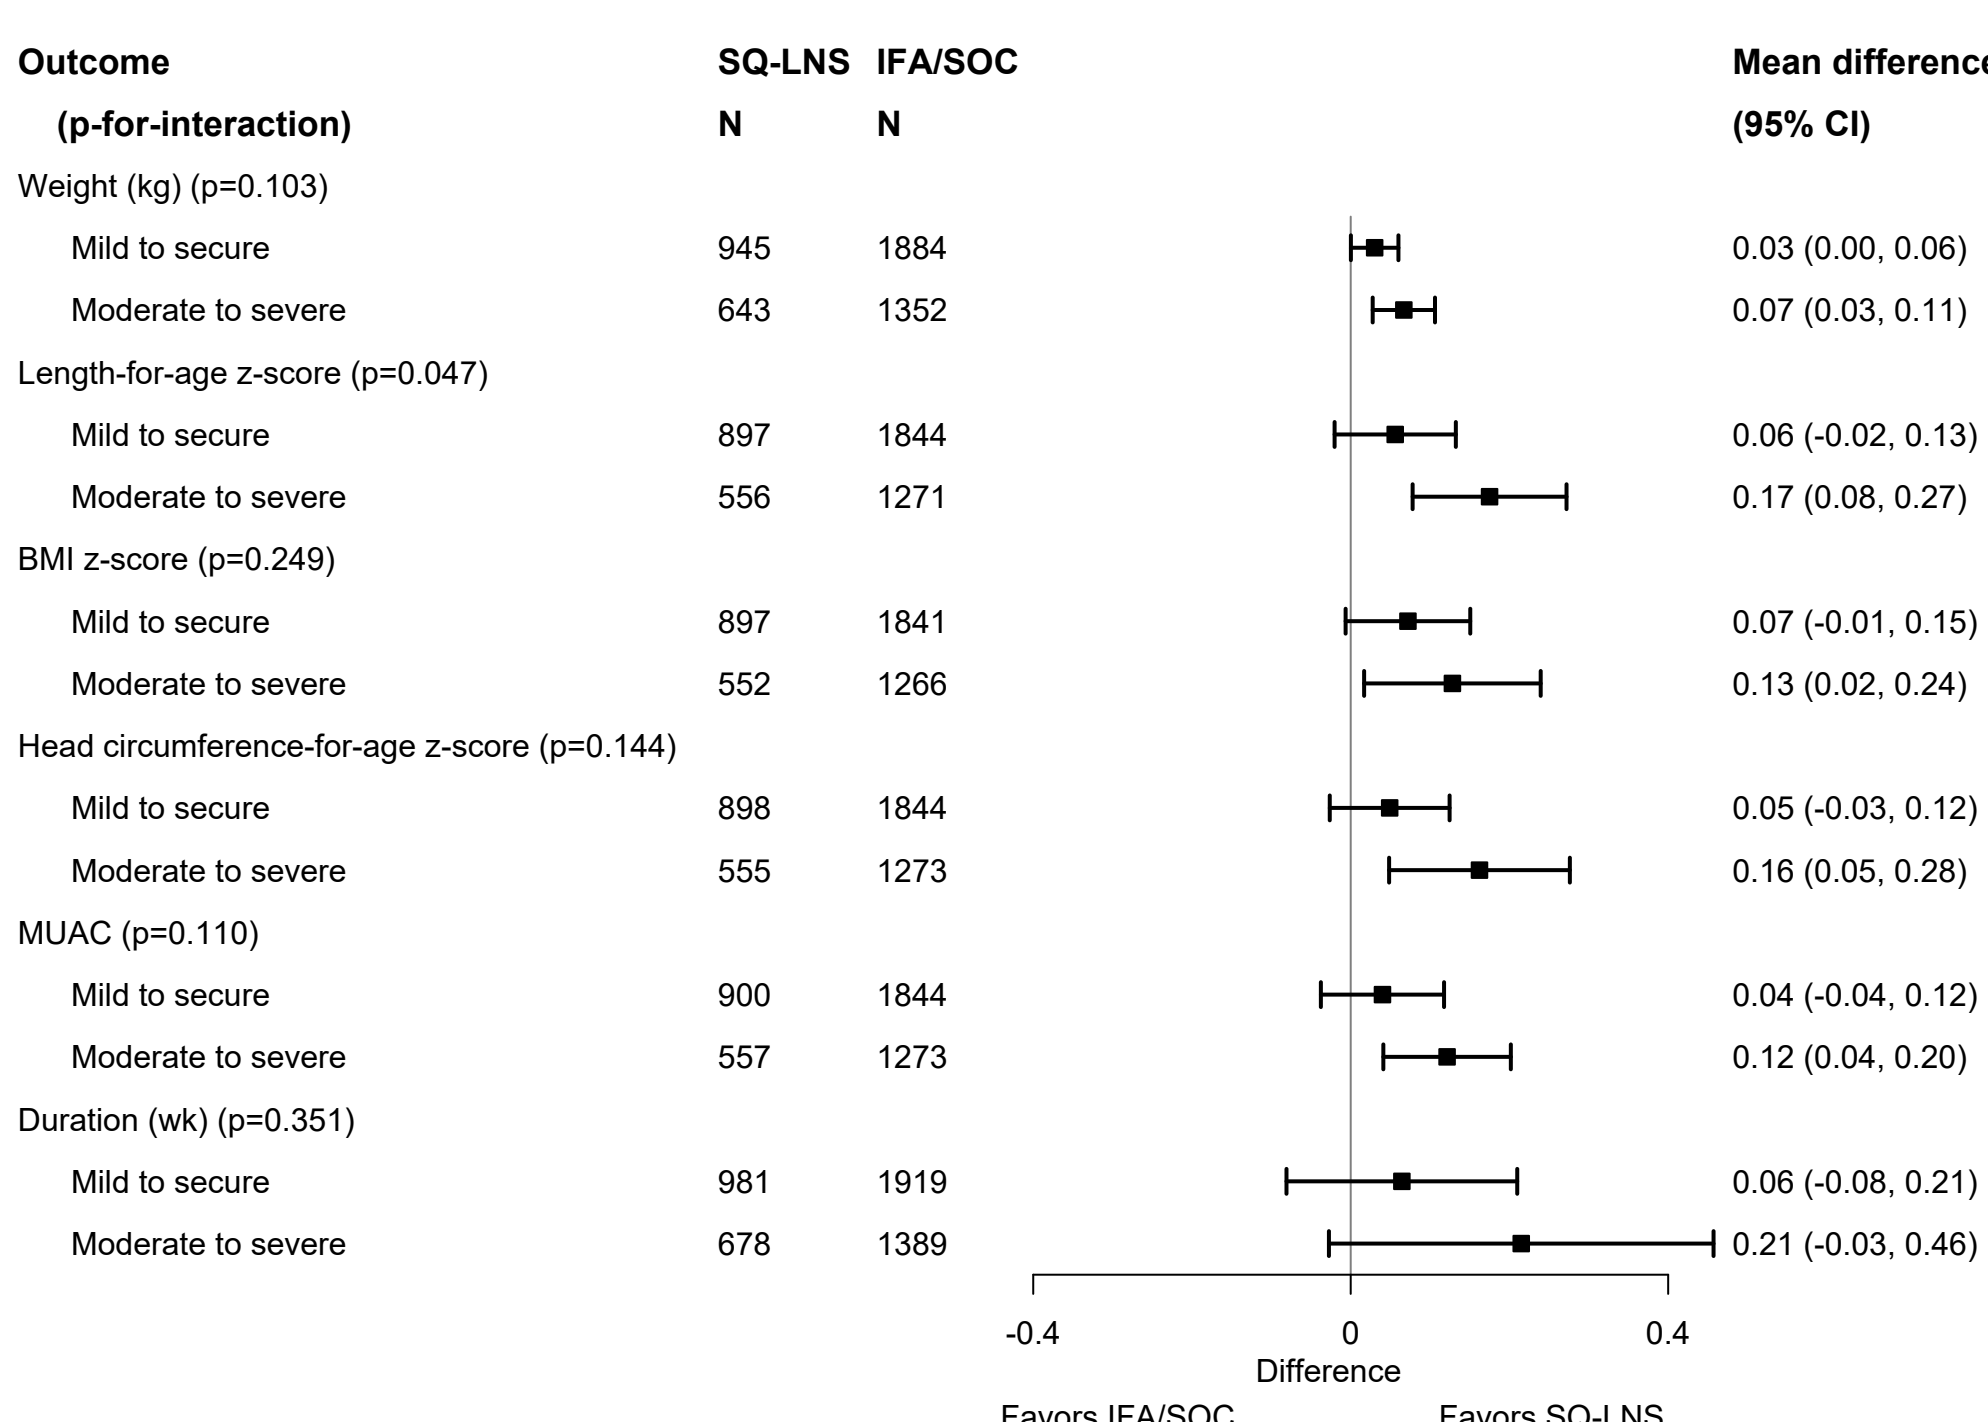

#### J) Food insecurity

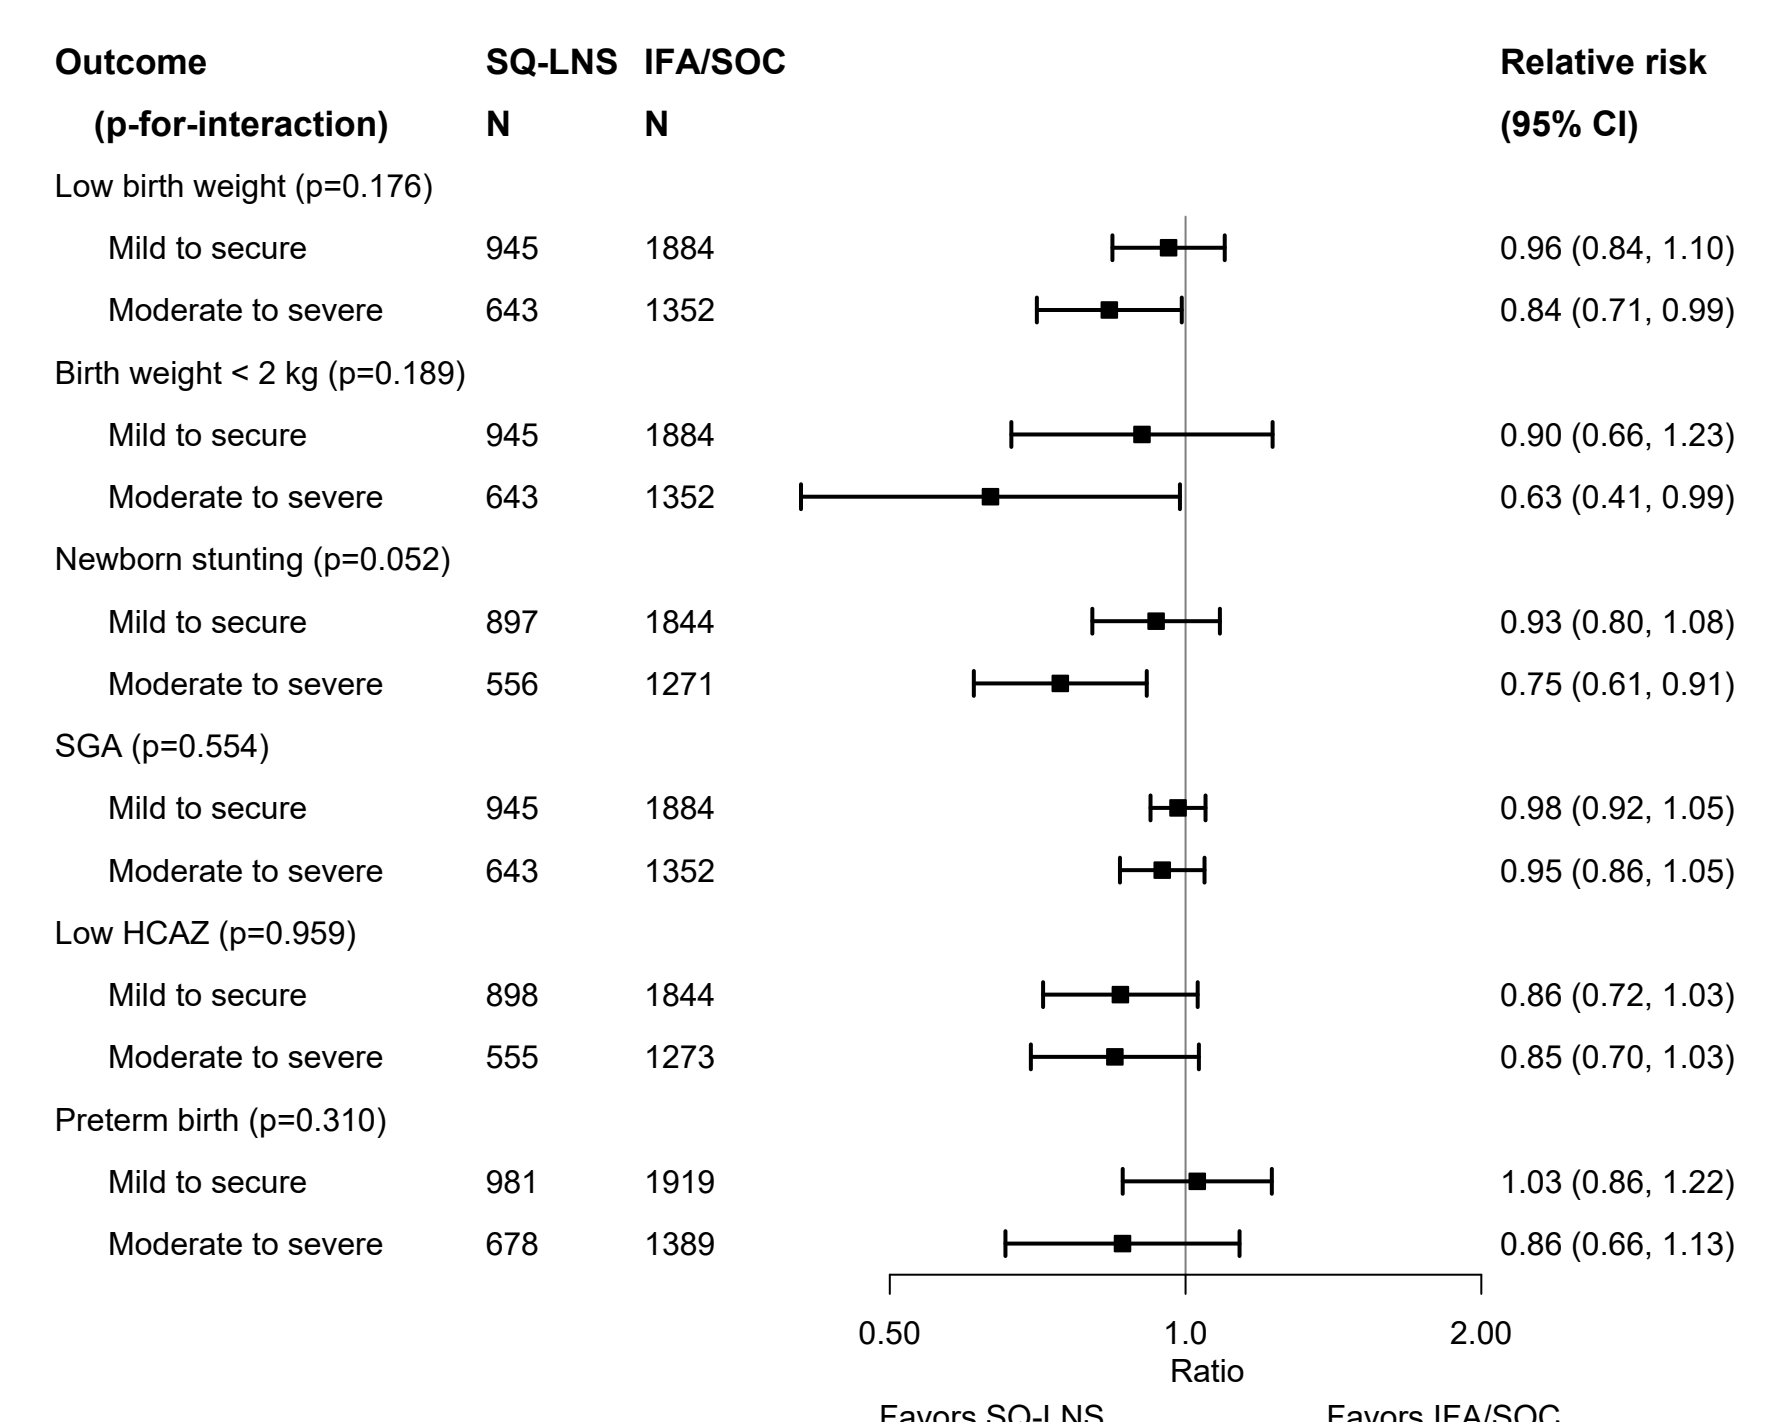

# Anthropometric outcomes at 6 mo stratified by infant sex, SQ-LNS vs IFA/SOC

A)

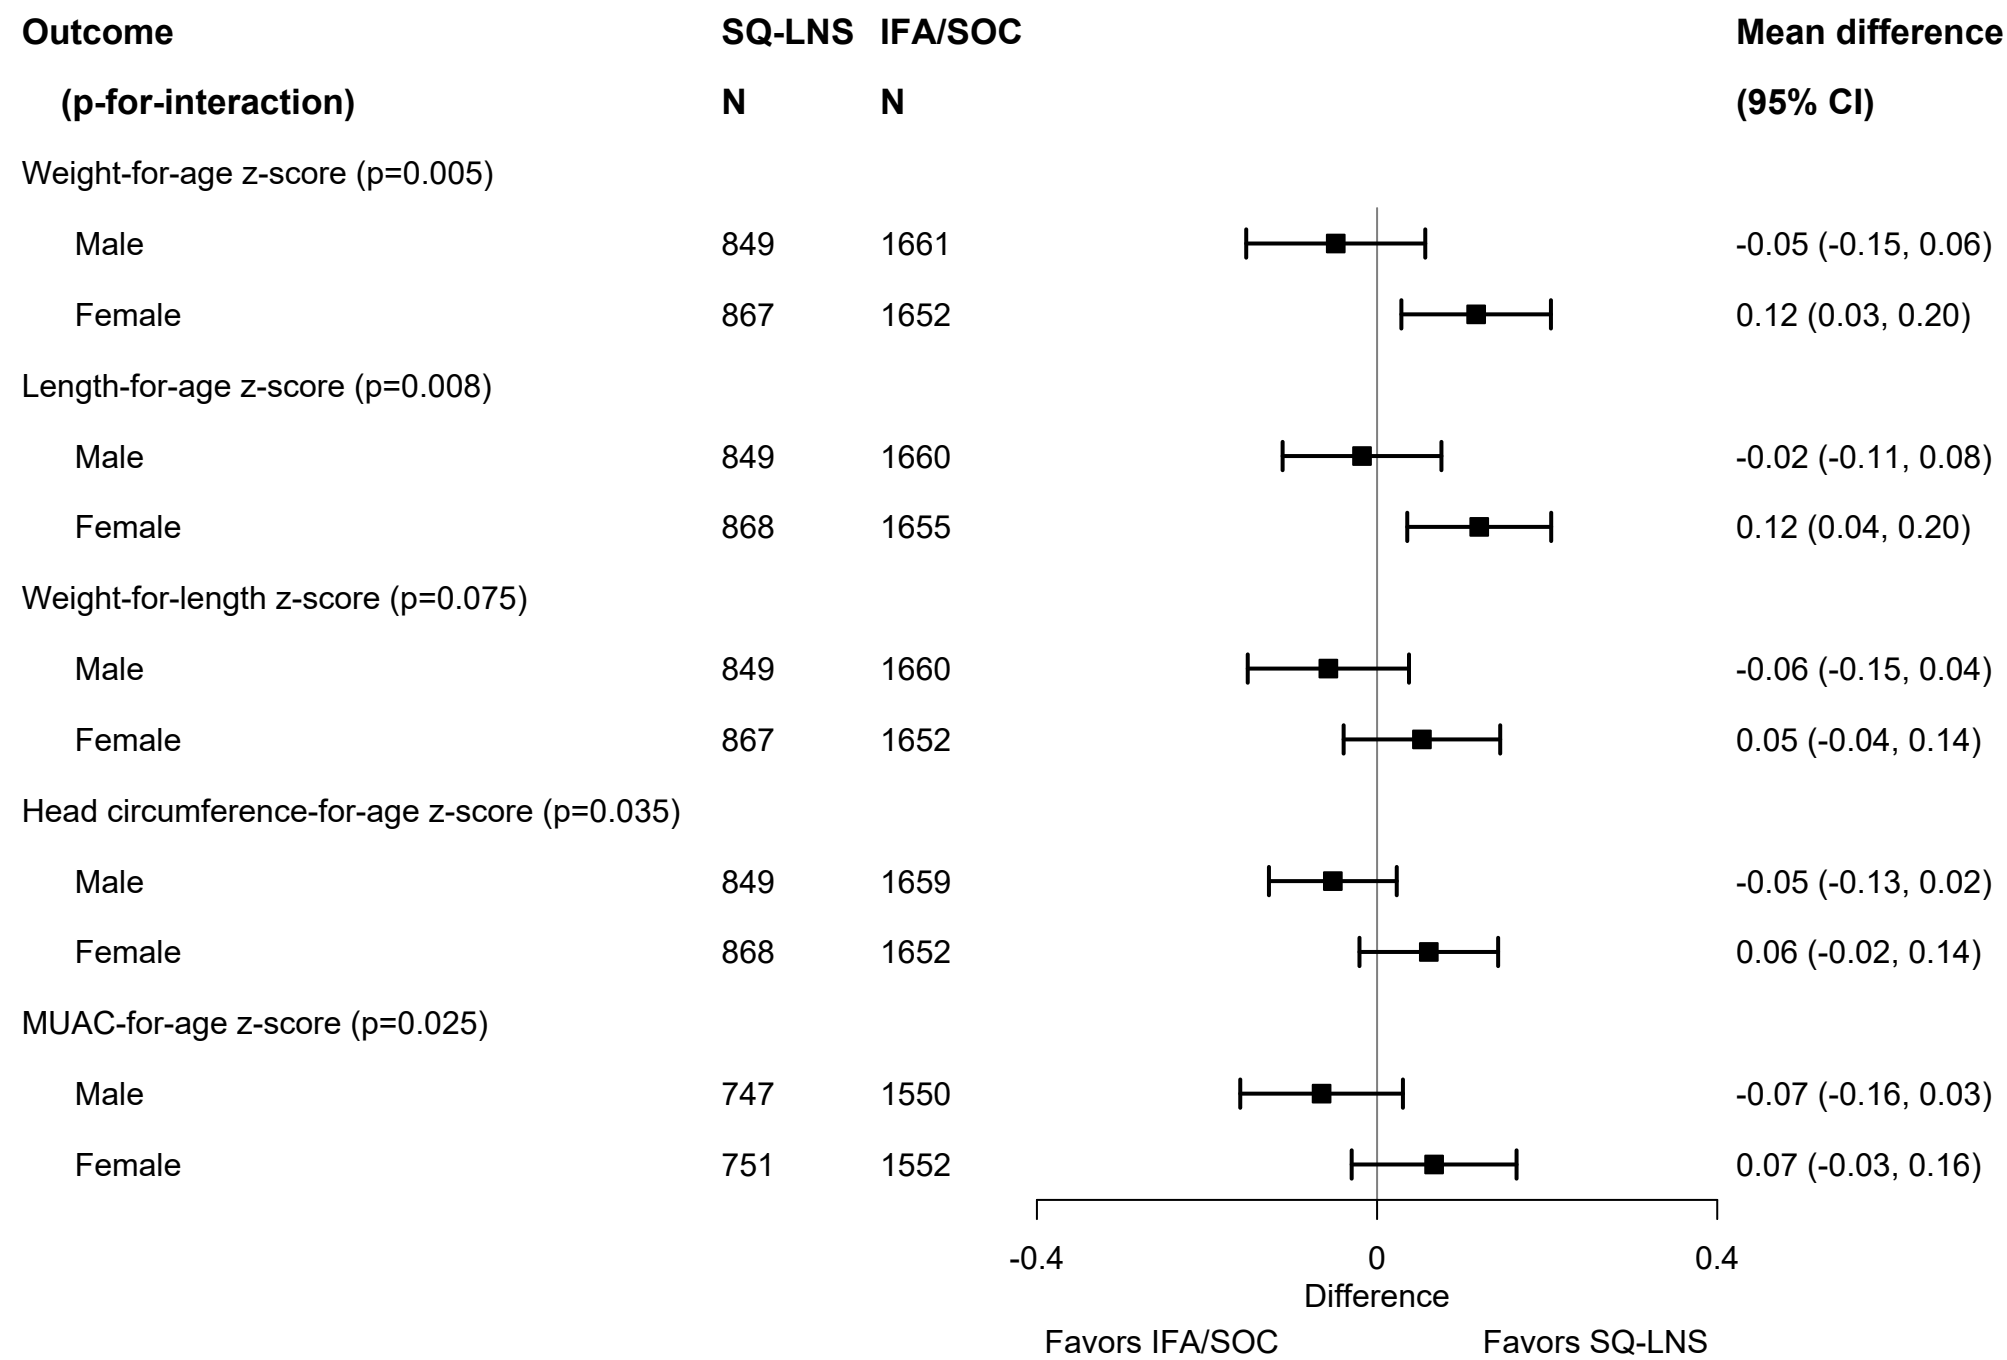

B)

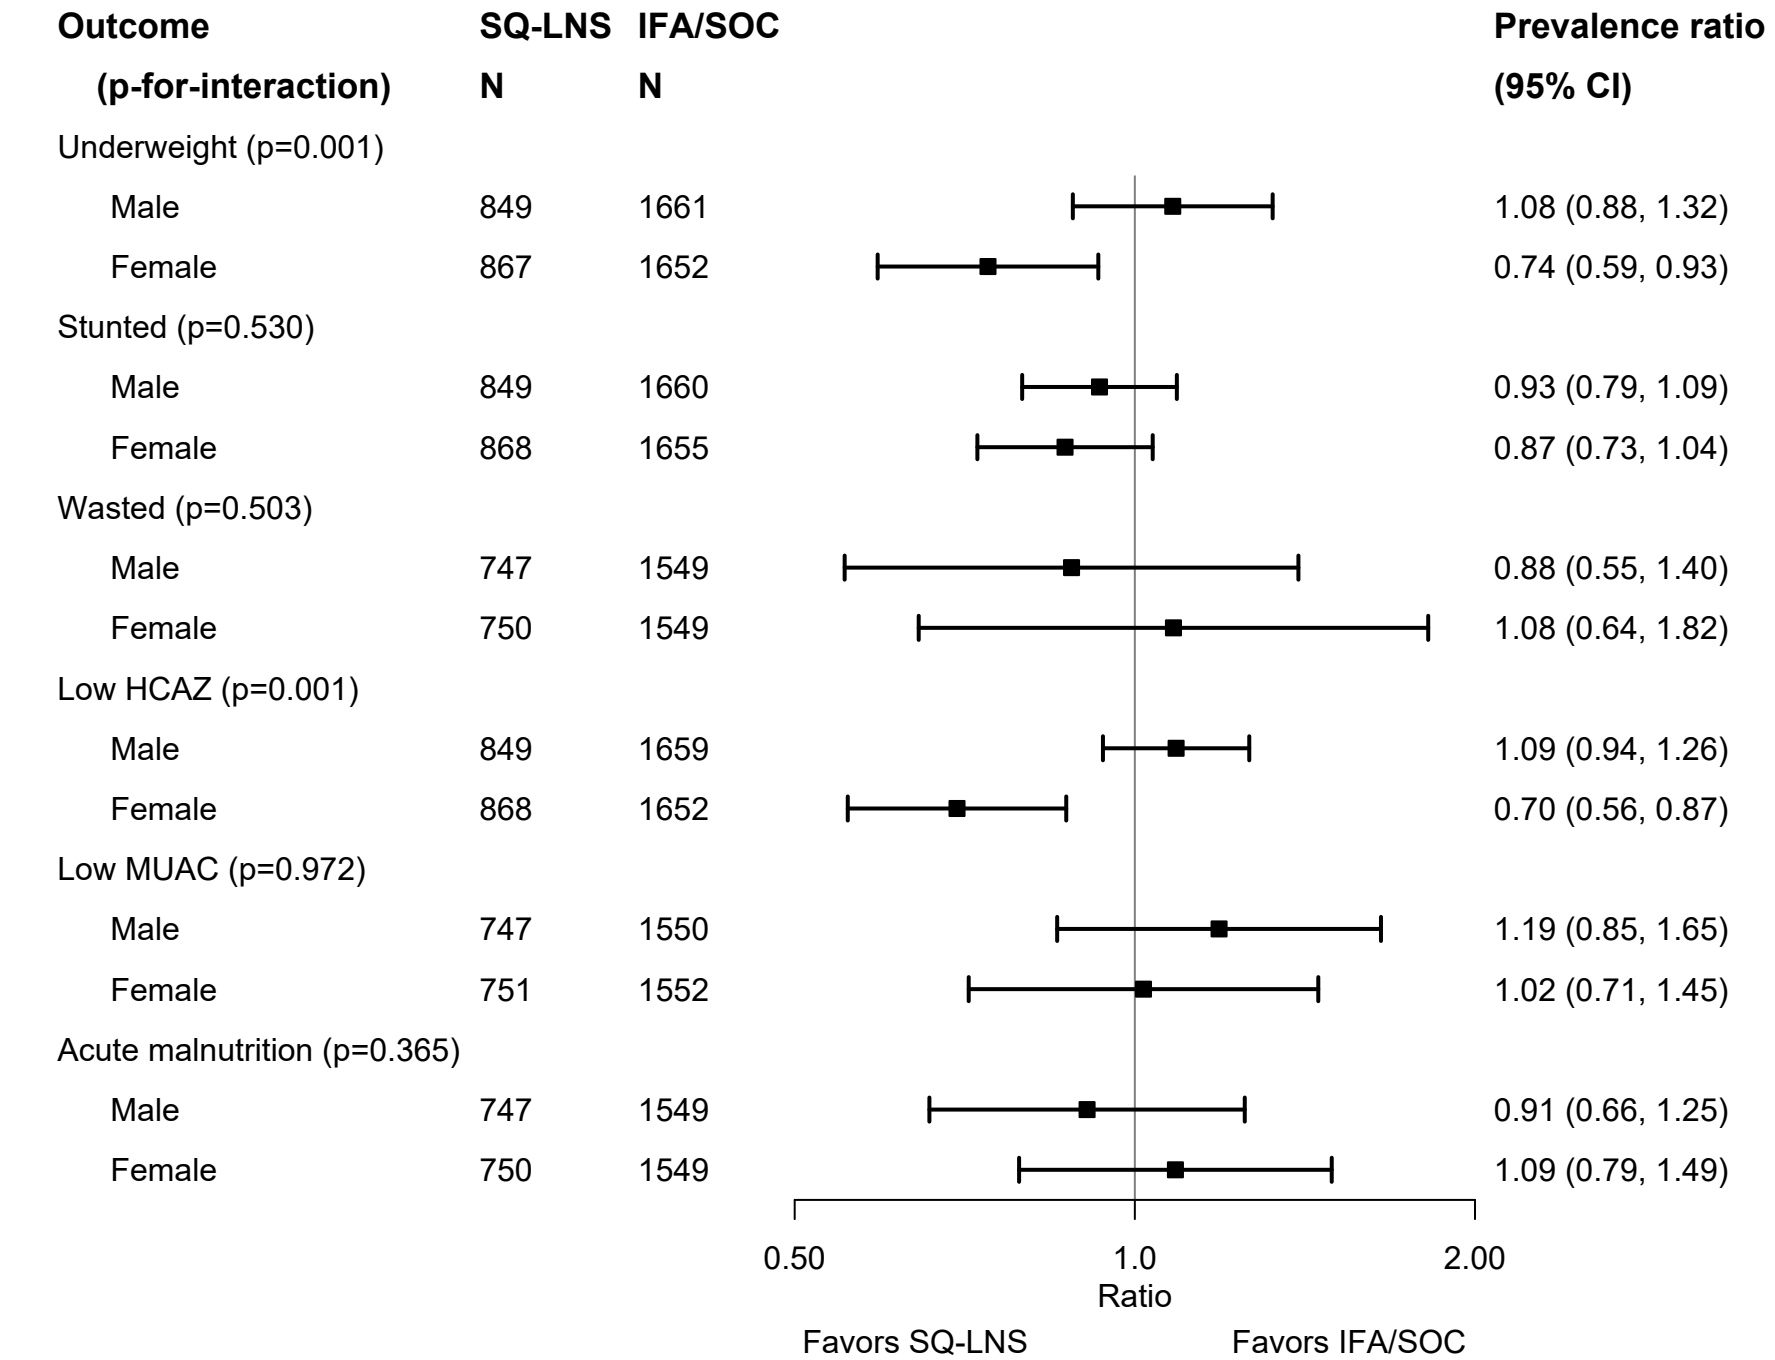

A)

## Birth weight

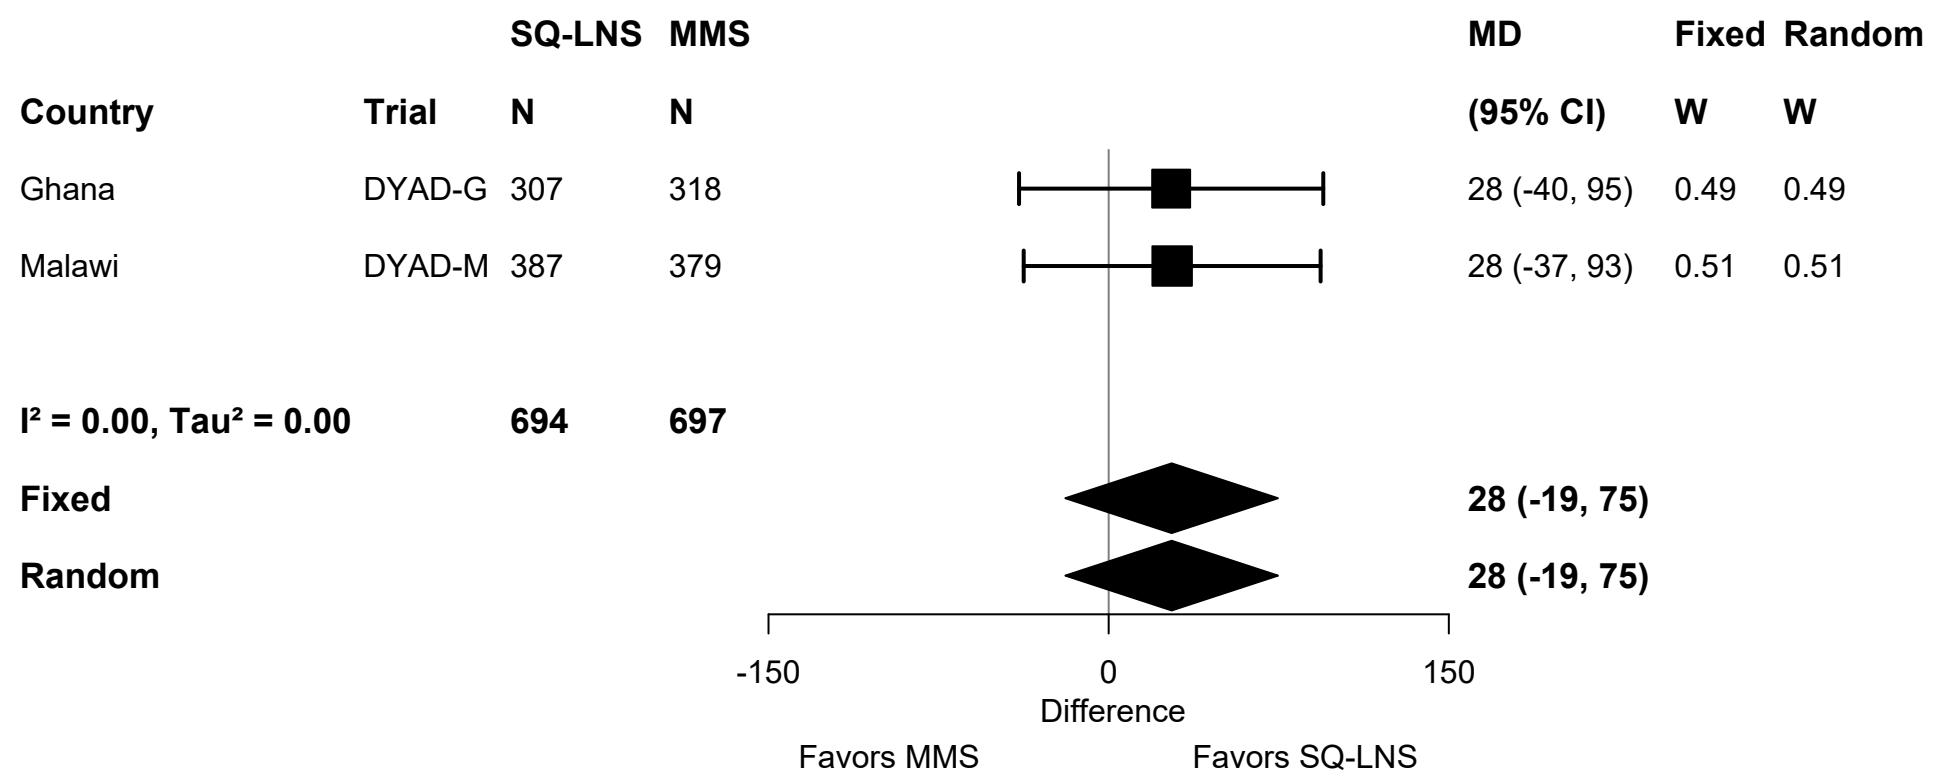

medRxiv preprint doi: <https://doi.org/10.1101/2024.05.17.24307546>; this version posted May 17, 2024. The copyright holder for this preprint (which was not certified by peer review) is the author/funder, who has granted medRxiv a license to display the preprint in perpetuity. It is made available under a [CC-BY 4.0 International license](https://creativecommons.org/licenses/by/4.0/).

B)

## Newborn LAZ

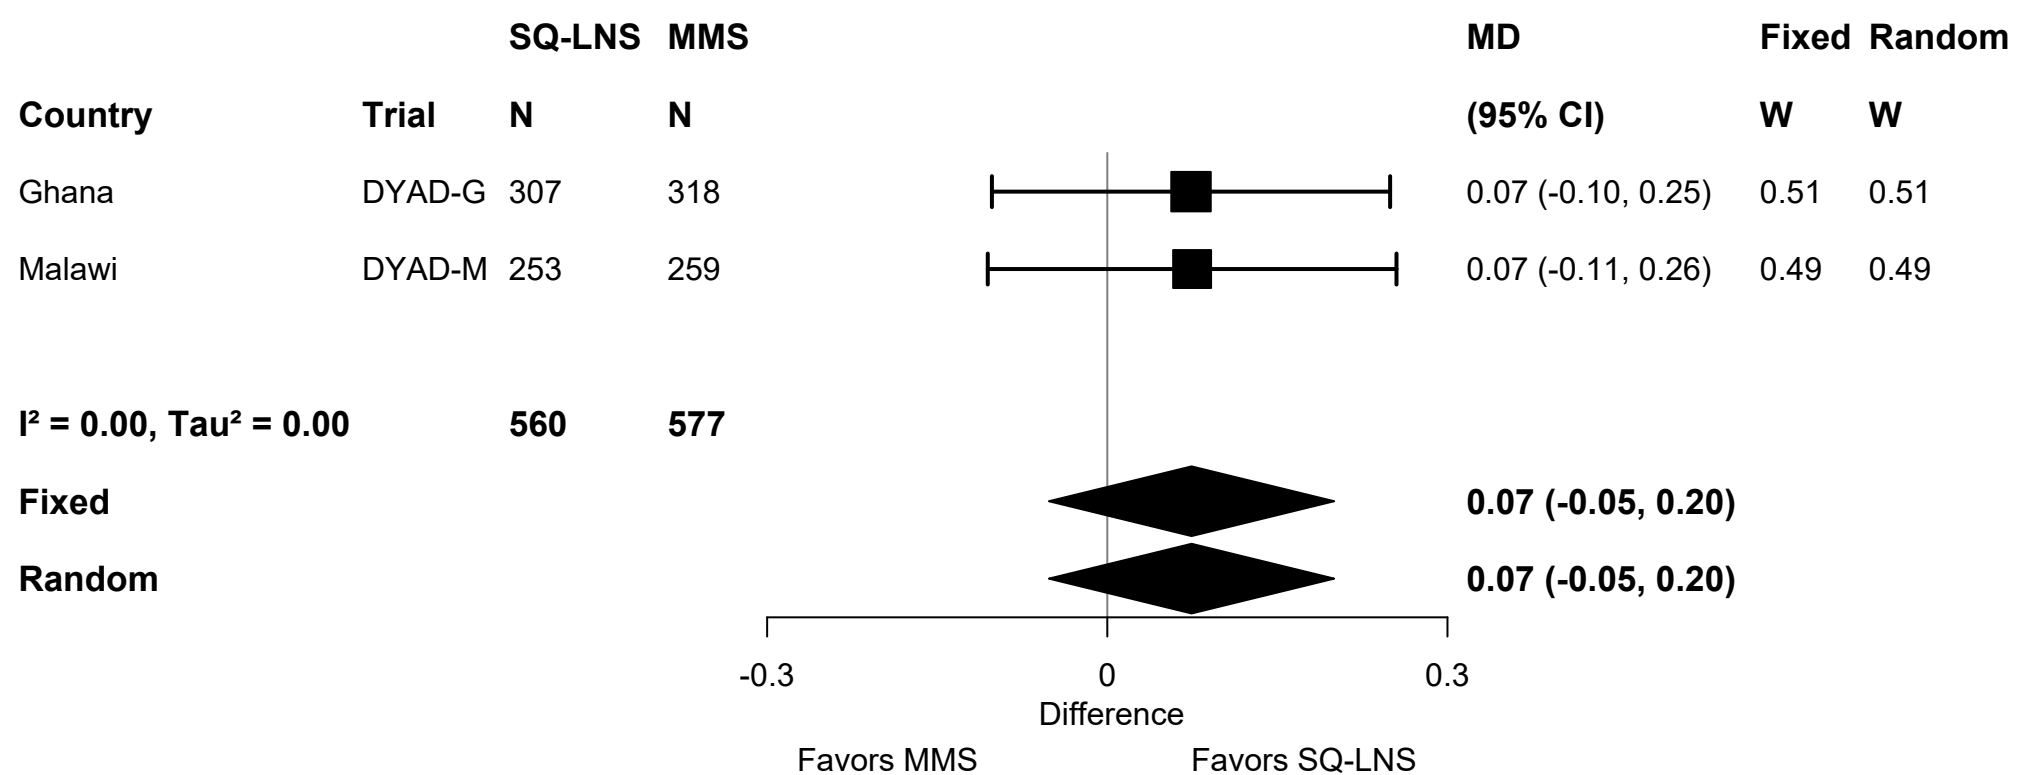

C)

## Newborn HCZ

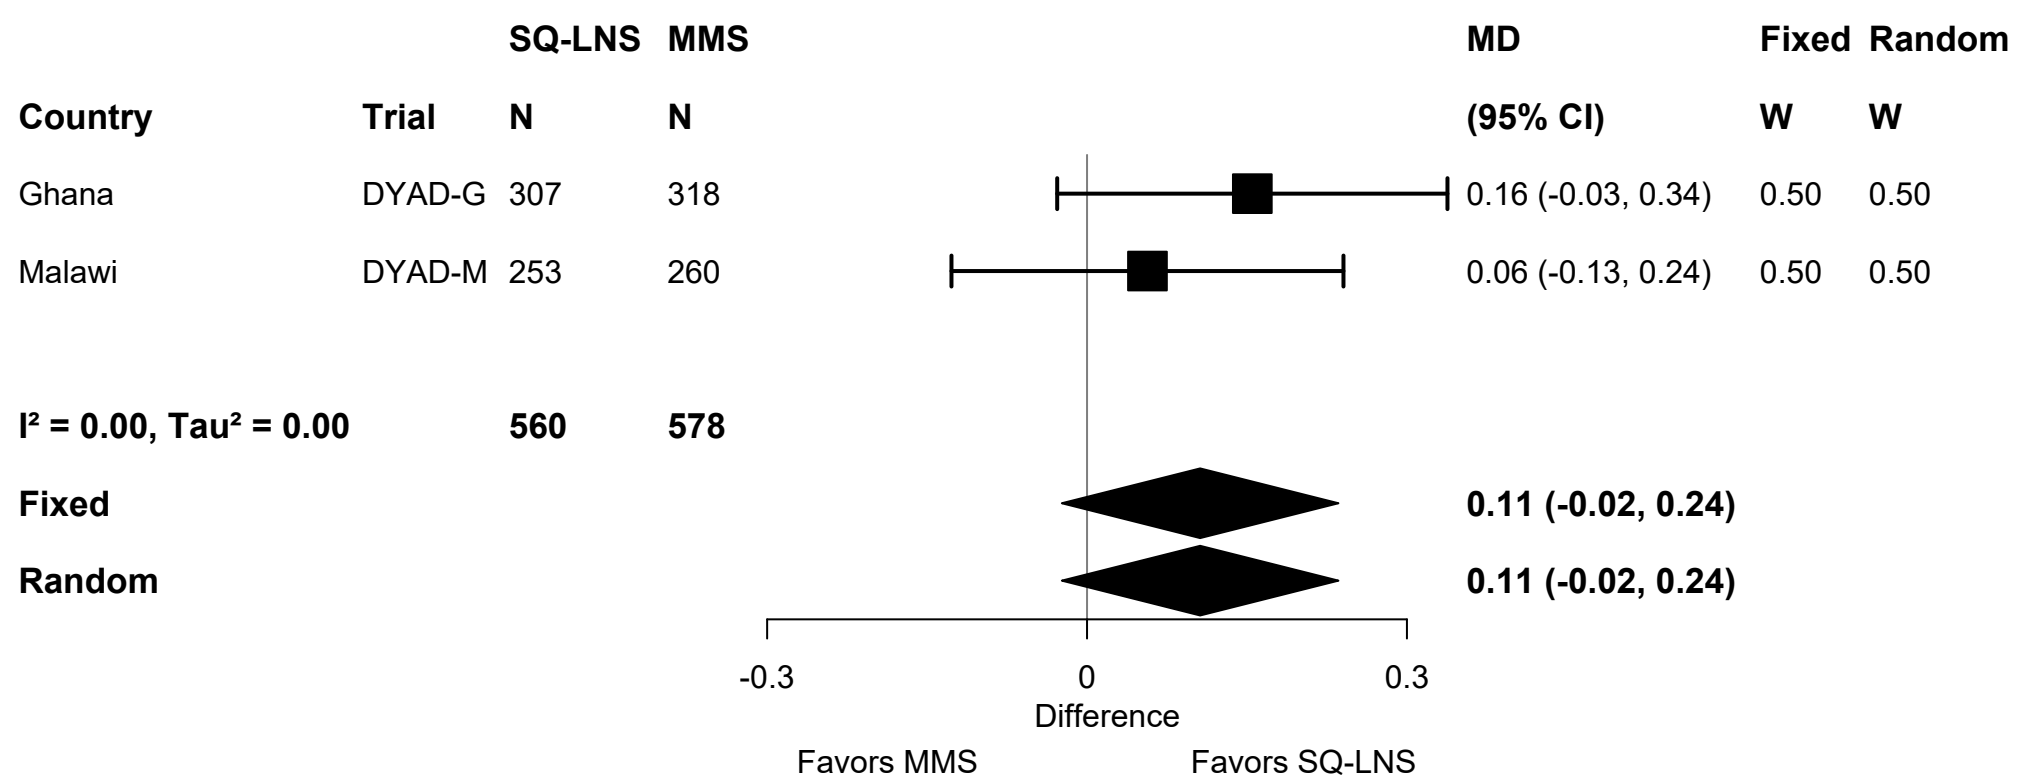

Source: https://medrxiv.org/content/10.1101/2024.05.17.24307546.full.pdf
